# Supplementary material for: P40 and P90 from Mpn142 are Targets of Multiple Processing Events on the Surface of Mycoplasma pneumoniae
Source: MDPI journal article supplement (doi:10.3390/proteomes3040512), 2015-12-16
Supplement: s1 [file s1]

## Supplementary Materials

**Table S1.** Predicted 2D PAGE locations of Mpn142 fragments against the observed 2D PAGE locations.

| Fragment # | Predicted Mass (kDa) | Predicted pI | Observed Mass (kDa) | Observed pI                                                    |
|------------|----------------------|--------------|---------------------|----------------------------------------------------------------|
| 1          | 30.59                | 8.86         | 35<br>37–50 *       | >7, <6, 6.9, 7.8, 8.5–8.7<br>4.7, 6.0, 6.6, 8.0, 8.5, 9.5, 9.7 |
| 2          | 83.57                | 5.29         | 80<br>80 *          | 4.9, <6, 6.2, 6.5<br>4.6–5.1                                   |
| 3          | 36.30                | 9.28         | 38–40               | 6.5, 6.8, 7.0, 7.5                                             |
| 4          | 35.57                | 4.83         | Not identified      | Not identified                                                 |
| 5          | 48.01                | 6.94         | Not identified      | Not identified                                                 |
| 6          | 16.60                | 9.22         | Not identified      | Not identified                                                 |
| 7          | 12.68                | 6.80         | Not identified      | Not identified                                                 |
| 8          | 21.16                | 9.73         | Not identified      | Not identified                                                 |
| 9          | 57.05                | 7.82         | 60                  | 4.9–5.0                                                        |
| 10         | 62.42                | 4.77         | 60                  | 4.9–5.0                                                        |
| 11         | 16.37                | 9.87         | 14                  | >7                                                             |
| 12         | 25.60                | 9.38         | Not identified      | Not identified                                                 |
| 13         | 36.67                | 4.91         | Not identified      | Not identified                                                 |
| 14         | 9.24                 | 4.55         | Not identified      | Not identified                                                 |
| 15         | 53.02                | 7.91         | Not identified      | Not identified                                                 |

Predicted mass and pI was calculated by ProtParam. \* indicates that the fragment was identified 2D gels of surface biotinylated proteins. # indicates number.

**Table S2.** Blast analysis of Mpn142 fragments.

| Fragment# | Homology (UniProt Accession #: Name) | Organism                     | Identity (%) |
|-----------|--------------------------------------|------------------------------|--------------|
| 1         | D5FY38: Adhesin                      | <i>Mycoplasma genitalium</i> | 40.4         |
| 2         | D5FY44: Adhesin                      | <i>Mycoplasma genitalium</i> | 58.0         |
| 3         | D5FY38: Adhesin                      | <i>Mycoplasma genitalium</i> | 39.0         |
| 4         | D5FY44: Adhesin                      | <i>Mycoplasma genitalium</i> | 58.0         |
| 5         | E9JMQ6: Adhesin                      | <i>Mycoplasma genitalium</i> | 67.6         |
| 6         | D5FY38: Adhesin                      | <i>Mycoplasma genitalium</i> | 56.1         |
| 7         | E9JMP4: Adhesin                      | <i>Mycoplasma genitalium</i> | 59.5         |
| 8         | E9JMQ6: Adhesin                      | <i>Mycoplasma genitalium</i> | 74.8         |
| 9         | E9JMQ6: Adhesin                      | <i>Mycoplasma genitalium</i> | 66.5         |
| 10        | D5FY44: Adhesin                      | <i>Mycoplasma genitalium</i> | 59.9         |
| 11        | E9JMQ6: Adhesin                      | <i>Mycoplasma genitalium</i> | 75.3         |
| 12        | E9JMQ6: Adhesin                      | <i>Mycoplasma genitalium</i> | 71.4         |
| 13        | E9JMP1: Adhesin                      | <i>Mycoplasma genitalium</i> | 62.5         |
| 14        | E9JMQ0: Adhesin                      | <i>Mycoplasma genitalium</i> | 65.4         |
| 15        | E9JMQ6: Adhesin                      | <i>Mycoplasma genitalium</i> | 66.0         |

Proteins listed were the top Blast non-*M. pneumoniae* hits. # indicates number.
