# Supplementary material for: P40 and P90 from Mpn142 are Targets of Multiple Processing Events on the Surface of Mycoplasma pneumoniae
Source: Proteomes. 2015 Dec 16;3(4):512–37. doi: 10.3390/proteomes3040512 (PMC5217387; doi:10.3390/proteomes3040512)
Supplement: Supplementary File 1 [file proteomes-03-00512-s001.zip › proteomes-03-00512-Supplementary File.xlsx]

## Sheet: Whole cell lysate
Found in gel mass range 75-100 kDa
Peak list data path	MPNslice4.mgf
Peak list format	Mascot generic
Search type	MIS
Mascot version	2.2.07
Database	LudwigNR
Fasta file	LudwigNR_Q211_generic_forward.fasta
Total sequences	12931687
Total residues	4483500103
Sequences after taxonomy filter	12931687
Number of queries	1341
Variable modifications	--------------------------------------------------------
Identifier	Name	Delta	Neutral loss(es)
1	Deamidated (N)	0.984009
2	Oxidation (M)	15.9949	63.9983	0
3	Propionamide (C)	71.0371
Search Parameters	--------------------------------------------------------
Taxonomy filter	All entries
Enzyme	semiTrypsin
Maximum Missed Cleavages	3
Fixed modifications
Quantitation method	None
Variable modifications	Deamidated (N),Oxidation (M),Propionamide (C)
Peptide Mass Tolerance	100
Peptide Mass Tolerance Units	ppm
Fragment Mass Tolerance	0.2
Fragment Mass Tolerance Units	Da
Mass values	Monoisotopic
Instrument type	ESI-QUAD-TOF
Isotope error mode	0
Format parameters	--------------------------------------------------------
Significance threshold	0.05
Max. number of hits	0
Use MudPIT protein scoring	0
Ions score cut-off	0
Include same-set proteins	0
Include sub-set proteins	0
Include unassigned	0
Require bold red	1
Use homology threshold	0
Group protein families	0
Protein hits	--------------------------------------------------------
prot_hit_num	prot_acc	prot_desc	prot_score	prot_mass	prot_matches	prot_matches_sig	prot_sequences	prot_sequences_sig	pep_query	pep_rank	pep_isbold	pep_isunique	pep_exp_mz	pep_exp_mr	pep_exp_z	pep_calc_mr	pep_delta	pep_miss	pep_score	pep_expect	pep_res_before	pep_seq	pep_res_after	pep_var_mod	pep_var_mod_pos	pep_summed_mod_pos	pep_scan_title
9	Q50341	sp|Q50341|Mgp-operon protein 3 Tax_Id=2104 [Mycoplasma pneumoniae]	1139	130378	27	1	25	1	53	1	1	1	424.194	846.374	2	846.398	-0.0248	0	35.94	130	T	PAFDNQR	A				sample=1 period=1 cycle=5044 experiment=4
9	Q50341	sp|Q50341|Mgp-operon protein 3 Tax_Id=2104 [Mycoplasma pneumoniae]	1139	130378	27	1	25	1	55	6	1	1	849.471	848.464	1	848.476	-0.0119	0	43.71	24	L	LNFGTGLK	A				sample=1 period=1 cycle=5439 experiment=2
9	Q50341	sp|Q50341|Mgp-operon protein 3 Tax_Id=2104 [Mycoplasma pneumoniae]	1139	130378	27	1	25	1	73	3	1	1	456.281	910.548	2	910.56	-0.0117	0	30.06	230	A	VTVVAGPLR	A				sample=1 period=1 cycle=5079 experiment=4
9	Q50341	sp|Q50341|Mgp-operon protein 3 Tax_Id=2104 [Mycoplasma pneumoniae]	1139	130378	27	1	25	1	122	2	1	1	501.809	1001.6	2	1001.61	-0.0094	0	41.17	38	K	IITQTSVIK	K				sample=1 period=1 cycle=5009 experiment=2
9	Q50341	sp|Q50341|Mgp-operon protein 3 Tax_Id=2104 [Mycoplasma pneumoniae]	1139	130378	27	1	25	1	176	1	1	1	532.244	1062.47	2	1062.5	-0.0257	0	41.5	41	K	TELNWGTDK	Q				sample=1 period=1 cycle=5065 experiment=4
9	Q50341	sp|Q50341|Mgp-operon protein 3 Tax_Id=2104 [Mycoplasma pneumoniae]	1139	130378	27	1	25	1	197	1	1	1	547.332	1092.65	2	1092.63	0.0195	1	52.1	2.3	R	KGYAVITVSR	T				sample=1 period=1 cycle=5054 experiment=2
9	Q50341	sp|Q50341|Mgp-operon protein 3 Tax_Id=2104 [Mycoplasma pneumoniae]	1139	130378	27	1	25	1	199	7	1	1	548.263	1094.51	2	1094.51	-0.0041	0	33.31	270	K	FTPAFDNQR	A				sample=1 period=1 cycle=5044 experiment=2
9	Q50341	sp|Q50341|Mgp-operon protein 3 Tax_Id=2104 [Mycoplasma pneumoniae]	1139	130378	27	1	25	1	303	6	1	1	605.339	1208.66	2	1208.62	0.0448	0	27.18	1100	K	QFVENQLGFK	D				sample=1 period=1 cycle=5159 experiment=2
9	Q50341	sp|Q50341|Mgp-operon protein 3 Tax_Id=2104 [Mycoplasma pneumoniae]	1139	130378	27	1	25	1	398	1	1	1	642.822	1283.63	2	1283.64	-0.0113	0	43.83	29	K	LQDSSFVDVFK	K				sample=1 period=1 cycle=5276 experiment=2
9	Q50341	sp|Q50341|Mgp-operon protein 3 Tax_Id=2104 [Mycoplasma pneumoniae]	1139	130378	27	1	25	1	487	1	1	0	677.372	1352.73	2	1352.72	0.0104	0	73.79	0.028	K	VDTLTTAVGSVYK	K				sample=1 period=1 cycle=5160 experiment=3
9	Q50341	sp|Q50341|Mgp-operon protein 3 Tax_Id=2104 [Mycoplasma pneumoniae]	1139	130378	27	1	25	1	531	1	1	1	694.799	1387.58	2	1387.62	-0.0324	0	52.2	3.1	Y	YYSANFPEAGNR	R				sample=1 period=1 cycle=5055 experiment=2
9	Q50341	sp|Q50341|Mgp-operon protein 3 Tax_Id=2104 [Mycoplasma pneumoniae]	1139	130378	27	1	25	1	557	4	1	1	706.862	1411.71	2	1411.73	-0.025	1	40.63	65	K	LQDSSFVDVFKK	V				sample=1 period=1 cycle=5225 experiment=2
9	Q50341	sp|Q50341|Mgp-operon protein 3 Tax_Id=2104 [Mycoplasma pneumoniae]	1139	130378	27	1	25	1	559	1	1	1	706.892	1411.77	2	1411.78	-0.0122	0	30.3	630	K	IAGIPLNIDFPSR	I				sample=1 period=1 cycle=5335 experiment=2
9	Q50341	sp|Q50341|Mgp-operon protein 3 Tax_Id=2104 [Mycoplasma pneumoniae]	1139	130378	27	1	25	1	619	1	1	1	727.403	1452.79	2	1452.82	-0.0295	0	40.63	60	R	GHKPNYSAVLLVR	G				sample=1 period=1 cycle=5157 experiment=2
9	Q50341	sp|Q50341|Mgp-operon protein 3 Tax_Id=2104 [Mycoplasma pneumoniae]	1139	130378	27	1	25	1	648	1	1	0	741.414	1480.81	2	1480.81	0.0004	1	68.25	0.1	K	KVDTLTTAVGSVYK	K				sample=1 period=1 cycle=5134 experiment=2
9	Q50341	sp|Q50341|Mgp-operon protein 3 Tax_Id=2104 [Mycoplasma pneumoniae]	1139	130378	27	1	25	1	704	1	1	1	766.39	1530.77	2	1530.78	-0.0172	0	69.56	0.094	V	PIYNEGIVDIWGR	V				sample=1 period=1 cycle=5462 experiment=4
9	Q50341	sp|Q50341|Mgp-operon protein 3 Tax_Id=2104 [Mycoplasma pneumoniae]	1139	130378	27	1	25	1	826	1	1	1	825.367	1648.72	2	1648.73	-0.0054	0	58.3	1.1	K	IEYLDGNFYGEDSK	I				sample=1 period=1 cycle=5176 experiment=2
9	Q50341	sp|Q50341|Mgp-operon protein 3 Tax_Id=2104 [Mycoplasma pneumoniae]	1139	130378	27	1	25	1	956	1	1	1	910.99	1819.97	2	1819.96	0.0094	0	67.72	0.15	R	TDQLLVYGIVNESELK	S				sample=1 period=1 cycle=5331 experiment=2
9	Q50341	sp|Q50341|Mgp-operon protein 3 Tax_Id=2104 [Mycoplasma pneumoniae]	1139	130378	27	1	25	1	969	1	1	1	918.466	1834.92	2	1834.89	0.0216	1	38.34	140	R	LNFNPDTDKLLDSTDK	N				sample=1 period=1 cycle=5188 experiment=2
9	Q50341	sp|Q50341|Mgp-operon protein 3 Tax_Id=2104 [Mycoplasma pneumoniae]	1139	130378	27	1	25	1	1001	1	1	1	943.97	1885.93	2	1885.93	-0.0057	0	64.91	0.31	F	SYTPFGSAESAVDLTTLK	D				sample=1 period=1 cycle=5301 experiment=3
9	Q50341	sp|Q50341|Mgp-operon protein 3 Tax_Id=2104 [Mycoplasma pneumoniae]	1139	130378	27	1	25	1	1019	1	1	1	960.046	1918.08	2	1918.12	-0.0383	0	27.63	1400	K	APVKPAAPTAPRPPVQPPK	K				sample=1 period=1 cycle=4985 experiment=2
9	Q50341	sp|Q50341|Mgp-operon protein 3 Tax_Id=2104 [Mycoplasma pneumoniae]	1139	130378	27	1	25	1	1029	1	1	1	976.453	1950.89	2	1950.92	-0.0265	1	42.5	51	K	NTNGLFEKDDQLSENVK	R	Deamidated (N)	0.00100000000000000.0		sample=1 period=1 cycle=5120 experiment=3
9	Q50341	sp|Q50341|Mgp-operon protein 3 Tax_Id=2104 [Mycoplasma pneumoniae]	1139	130378	27	1	25	1	1074	1	1	1	1015.54	2029.07	2	2029.03	0.0412	0	30.53	840	R	DNGLVPIYNEGIVDIWGR	V				sample=1 period=1 cycle=5424 experiment=2
9	Q50341	sp|Q50341|Mgp-operon protein 3 Tax_Id=2104 [Mycoplasma pneumoniae]	1139	130378	27	1	25	1	1075	1	1	1	1016.03	2030.05	2	2030.01	0.035	0	41.94	63	R	DNGLVPIYNEGIVDIWGR	V	Deamidated (N)	0.010000000000000000.0		sample=1 period=1 cycle=5432 experiment=2
9	Q50341	sp|Q50341|Mgp-operon protein 3 Tax_Id=2104 [Mycoplasma pneumoniae]	1139	130378	27	1	25	1	1230	1	1	1	828.75	2483.23	3	2483.25	-0.0268	0	48.18	17	K	ISTLESQATDGFANSLLNFGTGLK	A				sample=1 period=1 cycle=5437 experiment=4
9	Q50341	sp|Q50341|Mgp-operon protein 3 Tax_Id=2104 [Mycoplasma pneumoniae]	1139	130378	27	1	25	1	1231	1	1	1	829.077	2484.21	3	2484.24	-0.0293	0	52.34	6.5	K	ISTLESQATDGFANSLLNFGTGLK	A	Deamidated (N)	0.000000000000000001000000.0		sample=1 period=1 cycle=5385 experiment=2
9	Q50341	sp|Q50341|Mgp-operon protein 3 Tax_Id=2104 [Mycoplasma pneumoniae]	1139	130378	27	1	25	1	1266	1	1	1	887.749	2660.23	3	2660.29	-0.0607	0	70.71	0.095	K	NSEPISFSYTPFGSAESAVDLTTLK	D				sample=1 period=1 cycle=5399 experiment=2
Found in gel mass range 50-75 kDa
Peak list data path	MPN5.mgf
Peak list format	Mascot generic
Search type	MIS
Mascot version	2.3.02
Database	LudwigNR
Fasta file	LudwigNR_Q411_generic_forward.fasta
Total sequences	15321871
Total residues	5325977554
Sequences after taxonomy filter	15321871
Number of queries	2178
Variable modifications	--------------------------------------------------------
Identifier	Name	Delta	Neutral loss(es)
1	Deamidated (NQ)	0.984016
2	Oxidation (M)	15.9949	0	63.9983
3	Propionamide (C)	71.0371
Search Parameters	--------------------------------------------------------
Taxonomy filter	All entries
Enzyme	semiTrypsin
Maximum Missed Cleavages	3
Fixed modifications
Quantitation method	None
Variable modifications	Deamidated (NQ),Oxidation (M),Propionamide (C)
Peptide Mass Tolerance	100
Peptide Mass Tolerance Units	ppm
Fragment Mass Tolerance	0.2
Fragment Mass Tolerance Units	Da
Mass values	Monoisotopic
Instrument type	ESI-QUAD-TOF
Isotope error mode	0
Format parameters	--------------------------------------------------------
Significance threshold	0.05
Max. number of hits	0
Use MudPIT protein scoring	0
Ions score cut-off	0
Include same-set proteins	0
Include sub-set proteins	0
Include unassigned	0
Require bold red	1
Use homology threshold	0
Group protein families	0
Protein hits	--------------------------------------------------------
prot_hit_num	prot_acc	prot_desc	prot_score	prot_mass	prot_matches	prot_matches_sig	prot_sequences	prot_sequences_sig	pep_query	pep_rank	pep_isbold	pep_isunique	pep_exp_mz	pep_exp_mr	pep_exp_z	pep_calc_mr	pep_delta	pep_miss	pep_score	pep_expect	pep_res_before	pep_seq	pep_res_after	pep_var_mod	pep_var_mod_pos	pep_summed_mod_pos	pep_scan_title
79	Q50341	sp|Q50341|Mgp-operon protein 3 Tax_Id=272634 [Mycoplasma pneumoniae]	173	130378	3	1	3	1	589	3	1	1	548.256	1094.5	2	1094.51	-0.0176	0	28.42	1200	K	FTPAFDNQR	A				MPN5.7749.7749.2
79	Q50341	sp|Q50341|Mgp-operon protein 3 Tax_Id=272634 [Mycoplasma pneumoniae]	173	130378	3	1	3	1	936	1	1	1	645.857	1289.7	2	1289.67	0.0261	0	106.08	2.7e-05	R	VDFAANSVLQAR	N				MPN5.8588.8588.2
79	Q50341	sp|Q50341|Mgp-operon protein 3 Tax_Id=272634 [Mycoplasma pneumoniae]	173	130378	3	1	3	1	1138	1	1	1	706.884	1411.75	2	1411.78	-0.0296	0	45.7	29	K	IAGIPLNIDFPSR	I				MPN5.7390.7390.2
Found in gel mass range 15-20 kDa
Peak list data path	MPN9.mgf
Peak list format	Mascot generic
Search type	MIS
Mascot version	2.3.02
Database	LudwigNR
Fasta file	LudwigNR_Q411_generic_forward.fasta
Total sequences	15321871
Total residues	5325977554
Sequences after taxonomy filter	15321871
Number of queries	894
Variable modifications	--------------------------------------------------------
Identifier	Name	Delta	Neutral loss(es)
1	Deamidated (NQ)	0.984016
2	Oxidation (M)	15.9949	0	63.9983
3	Propionamide (C)	71.0371
Search Parameters	--------------------------------------------------------
Taxonomy filter	All entries
Enzyme	semiTrypsin
Maximum Missed Cleavages	3
Fixed modifications
Quantitation method	None
Variable modifications	Deamidated (NQ),Oxidation (M),Propionamide (C)
Peptide Mass Tolerance	100
Peptide Mass Tolerance Units	ppm
Fragment Mass Tolerance	0.2
Fragment Mass Tolerance Units	Da
Mass values	Monoisotopic
Instrument type	ESI-QUAD-TOF
Isotope error mode	0
Format parameters	--------------------------------------------------------
Significance threshold	0.05
Max. number of hits	0
Use MudPIT protein scoring	0
Ions score cut-off	0
Include same-set proteins	0
Include sub-set proteins	0
Include unassigned	0
Require bold red	1
Use homology threshold	0
Group protein families	0
Protein hits	--------------------------------------------------------
prot_hit_num	prot_acc	prot_desc	prot_score	prot_mass	prot_matches	prot_matches_sig	prot_sequences	prot_sequences_sig	pep_query	pep_rank	pep_isbold	pep_isunique	pep_exp_mz	pep_exp_mr	pep_exp_z	pep_calc_mr	pep_delta	pep_miss	pep_score	pep_expect	pep_res_before	pep_seq	pep_res_after	pep_var_mod	pep_var_mod_pos	pep_summed_mod_pos	pep_scan_title
21	Q50341	sp|Q50341|Mgp-operon protein 3 Tax_Id=272634 [Mycoplasma pneumoniae]	104	130378	2	1	2	1	585	1	1	1	645.828	1289.64	2	1289.67	-0.0316	0	74.12	0.046	R	VDFAANSVLQAR	N				MPN9.8522.8522.2
21	Q50341	sp|Q50341|Mgp-operon protein 3 Tax_Id=272634 [Mycoplasma pneumoniae]	104	130378	2	1	2	1	697	1	1	1	706.884	1411.75	2	1411.78	-0.0296	0	35.19	330	K	IAGIPLNIDFPSR	I				MPN9.8698.8698.2
Found in gel mass range 10-15 kDa
Peak list data path	MPN10.mgf
Peak list format	Mascot generic
Search type	MIS
Mascot version	2.3.02
Database	LudwigNR
Fasta file	LudwigNR_Q411_generic_forward.fasta
Total sequences	15321871
Total residues	5325977554
Sequences after taxonomy filter	15321871
Number of queries	1112
Variable modifications	--------------------------------------------------------
Identifier	Name	Delta	Neutral loss(es)
1	Deamidated (NQ)	0.984016
2	Oxidation (M)	15.9949	0	63.9983
3	Propionamide (C)	71.0371
Search Parameters	--------------------------------------------------------
Taxonomy filter	All entries
Enzyme	semiTrypsin
Maximum Missed Cleavages	3
Fixed modifications
Quantitation method	None
Variable modifications	Deamidated (NQ),Oxidation (M),Propionamide (C)
Peptide Mass Tolerance	100
Peptide Mass Tolerance Units	ppm
Fragment Mass Tolerance	0.2
Fragment Mass Tolerance Units	Da
Mass values	Monoisotopic
Instrument type	ESI-QUAD-TOF
Isotope error mode	0
Format parameters	--------------------------------------------------------
Significance threshold	0.05
Max. number of hits	0
Use MudPIT protein scoring	0
Ions score cut-off	0
Include same-set proteins	0
Include sub-set proteins	0
Include unassigned	0
Require bold red	1
Use homology threshold	0
Group protein families	0
Protein hits	--------------------------------------------------------
prot_hit_num	prot_acc	prot_desc	prot_score	prot_mass	prot_matches	prot_matches_sig	prot_sequences	prot_sequences_sig	pep_query	pep_rank	pep_isbold	pep_isunique	pep_exp_mz	pep_exp_mr	pep_exp_z	pep_calc_mr	pep_delta	pep_miss	pep_score	pep_expect	pep_res_before	pep_seq	pep_res_after	pep_var_mod	pep_var_mod_pos	pep_summed_mod_pos	pep_scan_title
21	Q50341	sp|Q50341|Mgp-operon protein 3 Tax_Id=272634 [Mycoplasma pneumoniae]	233	130378	4	2	4	2	598	1	1	1	645.842	1289.67	2	1289.67	-0.0028	0	93.98	0.00047	R	VDFAANSVLQAR	N				MPN10.7878.7878.2
21	Q50341	sp|Q50341|Mgp-operon protein 3 Tax_Id=272634 [Mycoplasma pneumoniae]	233	130378	4	2	4	2	715	1	1	1	706.884	1411.75	2	1411.78	-0.0296	0	42.61	59	K	IAGIPLNIDFPSR	I				MPN10.8077.8077.2
21	Q50341	sp|Q50341|Mgp-operon protein 3 Tax_Id=272634 [Mycoplasma pneumoniae]	233	130378	4	2	4	2	922	7	1	1	910.962	1819.91	2	1819.96	-0.0475	0	31.36	1100	R	TDQLLVYGIVNESELK	S				MPN10.8815.8815.2
21	Q50341	sp|Q50341|Mgp-operon protein 3 Tax_Id=272634 [Mycoplasma pneumoniae]	233	130378	4	2	4	2	1057	1	1	1	828.756	2483.25	3	2483.25	-0.0085	0	75.53	0.053	K	ISTLESQATDGFANSLLNFGTGLK	A				MPN10.8189.8189.3
Found in gel mass range 0-10 kDa
Peak list data path	MPN11.mgf
Peak list format	Mascot generic
Search type	MIS
Mascot version	2.3.02
Database	LudwigNR
Fasta file	LudwigNR_Q411_generic_forward.fasta
Total sequences	15321871
Total residues	5325977554
Sequences after taxonomy filter	15321871
Number of queries	1499
Variable modifications	--------------------------------------------------------
Identifier	Name	Delta	Neutral loss(es)
1	Deamidated (NQ)	0.984016
2	Oxidation (M)	15.9949	0	63.9983
3	Propionamide (C)	71.0371
Search Parameters	--------------------------------------------------------
Taxonomy filter	All entries
Enzyme	semiTrypsin
Maximum Missed Cleavages	3
Fixed modifications
Quantitation method	None
Variable modifications	Deamidated (NQ),Oxidation (M),Propionamide (C)
Peptide Mass Tolerance	100
Peptide Mass Tolerance Units	ppm
Fragment Mass Tolerance	0.2
Fragment Mass Tolerance Units	Da
Mass values	Monoisotopic
Instrument type	ESI-QUAD-TOF
Isotope error mode	0
Format parameters	--------------------------------------------------------
Significance threshold	0.05
Max. number of hits	0
Use MudPIT protein scoring	0
Ions score cut-off	0
Include same-set proteins	0
Include sub-set proteins	0
Include unassigned	0
Require bold red	1
Use homology threshold	0
Group protein families	0
Protein hits	--------------------------------------------------------
prot_hit_num	prot_acc	prot_desc	prot_score	prot_mass	prot_matches	prot_matches_sig	prot_sequences	prot_sequences_sig	pep_query	pep_rank	pep_isbold	pep_isunique	pep_exp_mz	pep_exp_mr	pep_exp_z	pep_calc_mr	pep_delta	pep_miss	pep_score	pep_expect	pep_res_before	pep_seq	pep_res_after	pep_var_mod	pep_var_mod_pos	pep_summed_mod_pos	pep_scan_title
51	Q50341	sp|Q50341|Mgp-operon protein 3 Tax_Id=272634 [Mycoplasma pneumoniae]	158	130378	3	1	3	1	467	4	1	1	548.256	1094.5	2	1094.51	-0.0176	0	36.39	190	K	FTPAFDNQR	A				MPN11.8280.8280.2
51	Q50341	sp|Q50341|Mgp-operon protein 3 Tax_Id=272634 [Mycoplasma pneumoniae]	158	130378	3	1	3	1	724	1	1	1	645.842	1289.67	2	1289.67	-0.0028	0	82.46	0.0067	R	VDFAANSVLQAR	N				MPN11.7320.7320.2
51	Q50341	sp|Q50341|Mgp-operon protein 3 Tax_Id=272634 [Mycoplasma pneumoniae]	158	130378	3	1	3	1	884	1	1	1	706.884	1411.75	2	1411.78	-0.0296	0	45.96	27	K	IAGIPLNIDFPSR	I				MPN11.7536.7536.2
Found in gel mass range 50-75 kDa
Peak list data path	MPN16.mgf
Peak list format	Mascot generic
Search type	MIS
Mascot version	2.3.02
Database	LudwigNR
Fasta file	LudwigNR_Q411_generic_forward.fasta
Total sequences	15321871
Total residues	5325977554
Sequences after taxonomy filter	15321871
Number of queries	1350
Variable modifications	--------------------------------------------------------
Identifier	Name	Delta	Neutral loss(es)
1	Deamidated (NQ)	0.984016
2	Oxidation (M)	15.9949	0	63.9983
3	Propionamide (C)	71.0371
Search Parameters	--------------------------------------------------------
Taxonomy filter	All entries
Enzyme	semiTrypsin
Maximum Missed Cleavages	3
Fixed modifications
Quantitation method	None
Variable modifications	Deamidated (NQ),Oxidation (M),Propionamide (C)
Peptide Mass Tolerance	100
Peptide Mass Tolerance Units	ppm
Fragment Mass Tolerance	0.2
Fragment Mass Tolerance Units	Da
Mass values	Monoisotopic
Instrument type	ESI-QUAD-TOF
Isotope error mode	0
Format parameters	--------------------------------------------------------
Significance threshold	0.05
Max. number of hits	0
Use MudPIT protein scoring	0
Ions score cut-off	0
Include same-set proteins	0
Include sub-set proteins	0
Include unassigned	0
Require bold red	1
Use homology threshold	0
Group protein families	0
Protein hits	--------------------------------------------------------
prot_hit_num	prot_acc	prot_desc	prot_score	prot_mass	prot_matches	prot_matches_sig	prot_sequences	prot_sequences_sig	pep_query	pep_rank	pep_isbold	pep_isunique	pep_exp_mz	pep_exp_mr	pep_exp_z	pep_calc_mr	pep_delta	pep_miss	pep_score	pep_expect	pep_res_before	pep_seq	pep_res_after	pep_var_mod	pep_var_mod_pos	pep_summed_mod_pos	pep_scan_title
41	Q50341	sp|Q50341|Mgp-operon protein 3 Tax_Id=272634 [Mycoplasma pneumoniae]	152	130378	2	1	2	1	729	1	1	1	645.845	1289.68	2	1289.67	0.0028	0	87.5	0.0021	R	VDFAANSVLQAR	N				MPN16.6718.6718.2
41	Q50341	sp|Q50341|Mgp-operon protein 3 Tax_Id=272634 [Mycoplasma pneumoniae]	152	130378	2	1	2	1	1306	1	1	1	828.761	2483.26	3	2483.25	0.0076	0	70.34	0.17	K	ISTLESQATDGFANSLLNFGTGLK	A				MPN16.6487.6487.3
Found in gel mass range 37-50 kDa
Peak list data path	MPN17.mgf
Peak list format	Mascot generic
Search type	MIS
Mascot version	2.3.02
Database	LudwigNR
Fasta file	LudwigNR_Q411_generic_forward.fasta
Total sequences	15321871
Total residues	5325977554
Sequences after taxonomy filter	15321871
Number of queries	2609
Variable modifications	--------------------------------------------------------
Identifier	Name	Delta	Neutral loss(es)
1	Deamidated (NQ)	0.984016
2	Oxidation (M)	15.9949	0	63.9983
3	Propionamide (C)	71.0371
Search Parameters	--------------------------------------------------------
Taxonomy filter	All entries
Enzyme	semiTrypsin
Maximum Missed Cleavages	3
Fixed modifications
Quantitation method	None
Variable modifications	Deamidated (NQ),Oxidation (M),Propionamide (C)
Peptide Mass Tolerance	100
Peptide Mass Tolerance Units	ppm
Fragment Mass Tolerance	0.2
Fragment Mass Tolerance Units	Da
Mass values	Monoisotopic
Instrument type	ESI-QUAD-TOF
Isotope error mode	0
Format parameters	--------------------------------------------------------
Significance threshold	0.05
Max. number of hits	0
Use MudPIT protein scoring	0
Ions score cut-off	0
Include same-set proteins	0
Include sub-set proteins	0
Include unassigned	0
Require bold red	1
Use homology threshold	0
Group protein families	0
Protein hits	--------------------------------------------------------
prot_hit_num	prot_acc	prot_desc	prot_score	prot_mass	prot_matches	prot_matches_sig	prot_sequences	prot_sequences_sig	pep_query	pep_rank	pep_isbold	pep_isunique	pep_exp_mz	pep_exp_mr	pep_exp_z	pep_calc_mr	pep_delta	pep_miss	pep_score	pep_expect	pep_res_before	pep_seq	pep_res_after	pep_var_mod	pep_var_mod_pos	pep_summed_mod_pos	pep_scan_title
24	Q50341	sp|Q50341|Mgp-operon protein 3 Tax_Id=272634 [Mycoplasma pneumoniae]	640	130378	15	2	14	2	775	2	1	1	548.27	1094.53	2	1094.51	0.0119	0	33.82	370	K	FTPAFDNQR	A				MPN17.6503.6503.2
24	Q50341	sp|Q50341|Mgp-operon protein 3 Tax_Id=272634 [Mycoplasma pneumoniae]	640	130378	15	2	14	2	1054	1	1	1	621.843	1241.67	2	1241.66	0.0093	0	34.35	350	F	TTPLNGGLDVVR	A	Deamidated (NQ)	0.000010000000.0		MPN17.5709.5709.2
24	Q50341	sp|Q50341|Mgp-operon protein 3 Tax_Id=272634 [Mycoplasma pneumoniae]	640	130378	15	2	14	2	1155	1	1	1	645.86	1289.7	2	1289.67	0.0316	0	87.76	0.0018	R	VDFAANSVLQAR	N				MPN17.5756.5756.2
24	Q50341	sp|Q50341|Mgp-operon protein 3 Tax_Id=272634 [Mycoplasma pneumoniae]	640	130378	15	2	14	2	1381	1	1	1	706.902	1411.79	2	1411.78	0.0078	0	43.91	37	K	IAGIPLNIDFPSR	I				MPN17.6035.6035.2
24	Q50341	sp|Q50341|Mgp-operon protein 3 Tax_Id=272634 [Mycoplasma pneumoniae]	640	130378	15	2	14	2	1449	1	1	1	485.293	1452.86	3	1452.82	0.038	0	42.2	40	R	GHKPNYSAVLLVR	G				MPN17.6622.6622.3
24	Q50341	sp|Q50341|Mgp-operon protein 3 Tax_Id=272634 [Mycoplasma pneumoniae]	640	130378	15	2	14	2	1723	1	1	1	555.947	1664.82	3	1664.83	-0.0118	0	51.41	9.9	R	AAHLHPSYELVDWK	R				MPN17.5787.5787.3
24	Q50341	sp|Q50341|Mgp-operon protein 3 Tax_Id=272634 [Mycoplasma pneumoniae]	640	130378	15	2	14	2	1806	1	1	1	889.455	1776.9	2	1776.86	0.0382	0	51.36	11	K	LNESWPVYEPLDSTK	E				MPN17.7648.7648.2
24	Q50341	sp|Q50341|Mgp-operon protein 3 Tax_Id=272634 [Mycoplasma pneumoniae]	640	130378	15	2	14	2	1851	1	1	1	910.968	1819.92	2	1819.96	-0.0342	0	94.06	0.00059	R	TDQLLVYGIVNESELK	S				MPN17.6029.6029.2
24	Q50341	sp|Q50341|Mgp-operon protein 3 Tax_Id=272634 [Mycoplasma pneumoniae]	640	130378	15	2	14	2	2016	1	1	1	1015.52	2029.02	2	2029.03	-0.0037	0	36.63	350	R	DNGLVPIYNEGIVDIWGR	V				MPN17.7897.7897.2
24	Q50341	sp|Q50341|Mgp-operon protein 3 Tax_Id=272634 [Mycoplasma pneumoniae]	640	130378	15	2	14	2	2251	1	1	1	799.452	2395.33	3	2395.27	0.0583	0	41.05	120	K	TLQDLLVEQPVTPYTPNAGLAR	V				MPN17.6889.6889.3
24	Q50341	sp|Q50341|Mgp-operon protein 3 Tax_Id=272634 [Mycoplasma pneumoniae]	640	130378	15	2	14	2	2278	1	1	1	828.761	2483.26	3	2483.25	0.0076	0	61.73	1.3	K	ISTLESQATDGFANSLLNFGTGLK	A				MPN17.6201.6201.3
24	Q50341	sp|Q50341|Mgp-operon protein 3 Tax_Id=272634 [Mycoplasma pneumoniae]	640	130378	15	2	14	2	2425	1	1	1	943.529	2827.57	3	2827.53	0.0378	0	28.59	2400	K	AQGLTQPAYLIAGLDVVADHLVFAAFK	A				MPN17.6352.6352.3
24	Q50341	sp|Q50341|Mgp-operon protein 3 Tax_Id=272634 [Mycoplasma pneumoniae]	640	130378	15	2	14	2	1920	1	1	1	956.506	2866.5	3	2866.33	0.1701	0	40.62	300	K	ALNGSQSGSSDTSGSNSQDFASYVLIFK	A				MPN17.7855.7855.
24	Q50341	sp|Q50341|Mgp-operon protein 3 Tax_Id=272634 [Mycoplasma pneumoniae]	640	130378	15	2	14	2	2432	1	1	1	956.769	2867.29	3	2867.31	-0.0231	0	56.52	4.4	K	ALNGSQSGSSDTSGSNSQDFASYVLIFK	A	Deamidated (NQ)	0.0000010000000000000000000000.0		MPN17.7851.7851.3
24	Q50341	sp|Q50341|Mgp-operon protein 3 Tax_Id=272634 [Mycoplasma pneumoniae]	640	130378	15	2	14	2	2513	6	0	1	1088.22	3261.65	3	3261.62	0.0297	0	12.4	130000	A	NTYLLQDHNTLTPYTPFTTPLNGGLDVVR	A	2 Deamidated (NQ)	0.00000100000000000000010000000.0		MPN17.6125.6125.3
Found in gel mass range 25-37 kDa
Peak list data path	MPN18.mgf
Peak list format	Mascot generic
Search type	MIS
Mascot version	2.3.02
Database	LudwigNR
Fasta file	LudwigNR_Q411_generic_forward.fasta
Total sequences	15321871
Total residues	5325977554
Sequences after taxonomy filter	15321871
Number of queries	2116
Variable modifications	--------------------------------------------------------
Identifier	Name	Delta	Neutral loss(es)
1	Deamidated (NQ)	0.984016
2	Oxidation (M)	15.9949	0	63.9983
3	Propionamide (C)	71.0371
Search Parameters	--------------------------------------------------------
Taxonomy filter	All entries
Enzyme	semiTrypsin
Maximum Missed Cleavages	3
Fixed modifications
Quantitation method	None
Variable modifications	Deamidated (NQ),Oxidation (M),Propionamide (C)
Peptide Mass Tolerance	100
Peptide Mass Tolerance Units	ppm
Fragment Mass Tolerance	0.2
Fragment Mass Tolerance Units	Da
Mass values	Monoisotopic
Instrument type	ESI-QUAD-TOF
Isotope error mode	0
Format parameters	--------------------------------------------------------
Significance threshold	0.05
Max. number of hits	0
Use MudPIT protein scoring	0
Ions score cut-off	0
Include same-set proteins	0
Include sub-set proteins	0
Include unassigned	0
Require bold red	1
Use homology threshold	0
Group protein families	0
Protein hits	--------------------------------------------------------
prot_hit_num	prot_acc	prot_desc	prot_score	prot_mass	prot_matches	prot_matches_sig	prot_sequences	prot_sequences_sig	pep_query	pep_rank	pep_isbold	pep_isunique	pep_exp_mz	pep_exp_mr	pep_exp_z	pep_calc_mr	pep_delta	pep_miss	pep_score	pep_expect	pep_res_before	pep_seq	pep_res_after	pep_var_mod	pep_var_mod_pos	pep_summed_mod_pos	pep_scan_title
82	Q50341	sp|Q50341|Mgp-operon protein 3 Tax_Id=272634 [Mycoplasma pneumoniae]	101	130378	3	0	2	0	1046	1	1	1	645.845	1289.68	2	1289.67	0.0028	0	68.16	0.18	R	VDFAANSVLQAR	N				MPN18.5736.5736.2
82	Q50341	sp|Q50341|Mgp-operon protein 3 Tax_Id=272634 [Mycoplasma pneumoniae]	101	130378	3	0	2	0	1239	1	1	1	706.902	1411.79	2	1411.78	0.0078	0	38.03	150	K	IAGIPLNIDFPSR	I				MPN18.5977.5977.2
82	Q50341	sp|Q50341|Mgp-operon protein 3 Tax_Id=272634 [Mycoplasma pneumoniae]	101	130378	3	0	2	0	1241	4	1	1	707.401	1412.79	2	1412.77	0.021	0	13.55	43000	K	IAGIPLNIDFPSR	I	Deamidated (NQ)	0.0000001000000.0		MPN18.7374.7374.2
Found in gel mass range 20-25 kDa
Peak list data path	MPN19.mgf
Peak list format	Mascot generic
Search type	MIS
Mascot version	2.3.02
Database	LudwigNR
Fasta file	LudwigNR_Q411_generic_forward.fasta
Total sequences	15321871
Total residues	5325977554
Sequences after taxonomy filter	15321871
Number of queries	1993
Variable modifications	--------------------------------------------------------
Identifier	Name	Delta	Neutral loss(es)
1	Deamidated (NQ)	0.984016
2	Oxidation (M)	15.9949	0	63.9983
3	Propionamide (C)	71.0371
Search Parameters	--------------------------------------------------------
Taxonomy filter	All entries
Enzyme	semiTrypsin
Maximum Missed Cleavages	3
Fixed modifications
Quantitation method	None
Variable modifications	Deamidated (NQ),Oxidation (M),Propionamide (C)
Peptide Mass Tolerance	100
Peptide Mass Tolerance Units	ppm
Fragment Mass Tolerance	0.2
Fragment Mass Tolerance Units	Da
Mass values	Monoisotopic
Instrument type	ESI-QUAD-TOF
Isotope error mode	0
Format parameters	--------------------------------------------------------
Significance threshold	0.05
Max. number of hits	0
Use MudPIT protein scoring	0
Ions score cut-off	0
Include same-set proteins	0
Include sub-set proteins	0
Include unassigned	0
Require bold red	1
Use homology threshold	0
Group protein families	0
Protein hits	--------------------------------------------------------
prot_hit_num	prot_acc	prot_desc	prot_score	prot_mass	prot_matches	prot_matches_sig	prot_sequences	prot_sequences_sig	pep_query	pep_rank	pep_isbold	pep_isunique	pep_exp_mz	pep_exp_mr	pep_exp_z	pep_calc_mr	pep_delta	pep_miss	pep_score	pep_expect	pep_res_before	pep_seq	pep_res_after	pep_var_mod	pep_var_mod_pos	pep_summed_mod_pos	pep_scan_title
80	Q50341	sp|Q50341|Mgp-operon protein 3 Tax_Id=272634 [Mycoplasma pneumoniae]	136	130378	3	1	3	1	535	3	1	1	548.257	1094.5	2	1094.51	-0.0149	0	32.29	500	K	FTPAFDNQR	A				MPN19.7466.7466.2
80	Q50341	sp|Q50341|Mgp-operon protein 3 Tax_Id=272634 [Mycoplasma pneumoniae]	136	130378	3	1	3	1	868	1	1	1	645.815	1289.62	2	1289.67	-0.0567	0	85.55	0.0033	R	VDFAANSVLQAR	N				MPN19.6959.6959.2
80	Q50341	sp|Q50341|Mgp-operon protein 3 Tax_Id=272634 [Mycoplasma pneumoniae]	136	130378	3	1	3	1	1056	2	1	1	706.871	1411.73	2	1411.78	-0.0553	0	26.41	2600	K	IAGIPLNIDFPSR	I				MPN19.6455.6455.2

## Sheet: 2D
Found in gel mass range 45 kDa and at pI >7.0
Peak list data path	C:\Analyst Data\Projects\Mycoplasma\Michael\Pneumoniae\20130526 MPN 2D 4-7\MPN 2D_41.wiff
Peak list format	Mascot generic
Search type	MIS
Mascot version	2.4.1
Database	1::contaminants 2::LudwigNR
Fasta file	1::contaminants_all_09092011.fasta 2::LudwigNR_Q213_generic_forward.fasta
Total sequences	21307050
Total residues	7688062380
Sequences after taxonomy filter	13213406
Number of queries	205
Warning	No taxonomy indexes for contaminants, taxonomy ~Bacteria (Eubacteria)~ ignored. Searching all entries in contaminants
Variable modifications	--------------------------------------------------------
Identifier	Name	Delta	Neutral loss(es)
1	Deamidated (NQ)	0.984016
2	Oxidation (M)	15.9949	0	63.9983
3	Propionamide (C)	71.0371
Search Parameters	--------------------------------------------------------
Taxonomy filter	. . Bacteria (Eubacteria)
Enzyme	semiTrypsin
Maximum Missed Cleavages	3
Fixed modifications
Variable modifications	Deamidated (NQ),Oxidation (M),Propionamide (C)
Peptide Mass Tolerance	100
Peptide Mass Tolerance Units	ppm
Fragment Mass Tolerance	0.2
Fragment Mass Tolerance Units	Da
Mass values	Monoisotopic
Instrument type	ESI-QUAD-TOF
Format parameters	--------------------------------------------------------
Significance threshold	0.05
Max. number of hits	0
Use MudPIT protein scoring	0
Ions score cut-off	0
Include same-set proteins	0
Include sub-set proteins	0
Include unassigned	0
Require bold red	1
Use homology threshold	0
Group protein families	0
Protein hits	--------------------------------------------------------
prot_hit_num	prot_acc	prot_desc	prot_score	prot_mass	prot_matches	prot_matches_sig	prot_sequences	prot_sequences_sig	pep_query	pep_rank	pep_isbold	pep_isunique	pep_exp_mz	pep_exp_mr	pep_exp_z	pep_calc_mr	pep_delta	pep_miss	pep_score	pep_expect	pep_res_before	pep_seq	pep_res_after	pep_var_mod	pep_var_mod_pos	pep_summed_mod_pos	pep_scan_title
2	2::Q50314	sp|Q50314|MPN_688 ParA family protein MPN_688 Tax_Id=272634 [Mycoplasma pneumoniae (strain ATCC 29342 / M129)]	470	30062	7	3	7	3	63	1	1	0	533.312	1064.61	2	1064.58	0.0337	0	66.51	0.11	R	IVETIDTFK	E				File: MPN 2D_41.wiff, Sample: 20130524 MPN 2D_41 (sample number 1), Elution: 28.247 min, Period: 1, Cycle(s): 6036 (Experiment 3)
2	2::Q50314	sp|Q50314|MPN_688 ParA family protein MPN_688 Tax_Id=272634 [Mycoplasma pneumoniae (strain ATCC 29342 / M129)]	470	30062	7	3	7	3	68	1	1	0	541.312	1080.61	2	1080.56	0.045	0	61.95	0.31	-	MIISFVNNK	G	Oxidation (M)	0.200000000.0		File: MPN 2D_41.wiff, Sample: 20130524 MPN 2D_41 (sample number 1), Elution: 28.4 min, Period: 1, Cycle(s): 6043 (Experiment 3)
2	2::Q50314	sp|Q50314|MPN_688 ParA family protein MPN_688 Tax_Id=272634 [Mycoplasma pneumoniae (strain ATCC 29342 / M129)]	470	30062	7	3	7	3	91	1	1	1	590.354	1178.69	2	1178.67	0.028	0	49.84	4.8	R	LHNDVIELVK	S				File: MPN 2D_41.wiff, Sample: 20130524 MPN 2D_41 (sample number 1), Elution: 28.385 to 28.389 min, Period: 1, Cycle(s): 6043 (Experiment 2), 6042 (Experiment 4)
2	2::Q50314	sp|Q50314|MPN_688 ParA family protein MPN_688 Tax_Id=272634 [Mycoplasma pneumoniae (strain ATCC 29342 / M129)]	470	30062	7	3	7	3	117	1	1	1	628.384	1254.75	2	1254.72	0.036	0	78.61	0.0059	K	LPISLVSPTSNK	K				File: MPN 2D_41.wiff, Sample: 20130524 MPN 2D_41 (sample number 1), Elution: 28.676 to 28.771 min, Period: 1, Cycle(s): 6053 (Experiment 3), 6056 (Experiment 4)
2	2::Q50314	sp|Q50314|MPN_688 ParA family protein MPN_688 Tax_Id=272634 [Mycoplasma pneumoniae (strain ATCC 29342 / M129)]	470	30062	7	3	7	3	128	1	1	1	644.349	1286.68	2	1286.64	0.0439	0	47.26	16	K	YQTEYLEITK	E				File: MPN 2D_41.wiff, Sample: 20130524 MPN 2D_41 (sample number 1), Elution: 28.212 min, Period: 1, Cycle(s): 6035 (Experiment 2)
2	2::Q50314	sp|Q50314|MPN_688 ParA family protein MPN_688 Tax_Id=272634 [Mycoplasma pneumoniae (strain ATCC 29342 / M129)]	470	30062	7	3	7	3	133	1	1	0	654.866	1307.72	2	1307.68	0.0413	0	84.27	0.0027	K	TTMATNVAGSLVK	L	Oxidation (M)	0.0020000000000.0		File: MPN 2D_41.wiff, Sample: 20130524 MPN 2D_41 (sample number 1), Elution: 27.631 min, Period: 1, Cycle(s): 6013 (Experiment 2)
2	2::Q50314	sp|Q50314|MPN_688 ParA family protein MPN_688 Tax_Id=272634 [Mycoplasma pneumoniae (strain ATCC 29342 / M129)]	470	30062	7	3	7	3	186	1	1	1	840.456	1678.9	2	1678.83	0.0651	0	89.29	0.0011	K	NNVAFSEHFVSLTSK	S				File: MPN 2D_41.wiff, Sample: 20130524 MPN 2D_41 (sample number 1), Elution: 28.563 min, Period: 1, Cycle(s): 6049 (Experiment 3)
3	2::Q50341	sp|Q50341|MPN_142 Mgp-operon protein 3 Tax_Id=272634 [Mycoplasma pneumoniae (strain ATCC 29342 / M129)]	451	130378	8	2	8	2	30	5	1	1	454.748	907.481	2	907.455	0.0255	0	38.32	88	R	ATWVFER	K				File: MPN 2D_41.wiff, Sample: 20130524 MPN 2D_41 (sample number 1), Elution: 28.827 to 28.951 min, Period: 1, Cycle(s): 6059 (Experiment 2), 6063 (Experiment 4)
3	2::Q50341	sp|Q50341|MPN_142 Mgp-operon protein 3 Tax_Id=272634 [Mycoplasma pneumoniae (strain ATCC 29342 / M129)]	451	130378	8	2	8	2	114	1	1	1	621.855	1241.7	2	1241.66	0.0347	0	53.46	3	F	TTPLNGGLDVVR	A	Deamidated (NQ)	0.000010000000.0		File: MPN 2D_41.wiff, Sample: 20130524 MPN 2D_41 (sample number 1), Elution: 28.239 to 28.581 min, Period: 1, Cycle(s): 6036, 6040, 6046, 6050 (Experiment 2), 6042 (Experiment 3)
3	2::Q50341	sp|Q50341|MPN_142 Mgp-operon protein 3 Tax_Id=272634 [Mycoplasma pneumoniae (strain ATCC 29342 / M129)]	451	130378	8	2	8	2	185	1	1	1	838.922	1675.83	2	1675.77	0.0568	0	48.19	16	K	TTAENDAPLVGMVGSGAA	G	Oxidation (M)	0.000000000002000000.0		File: MPN 2D_41.wiff, Sample: 20130524 MPN 2D_41 (sample number 1), Elution: 27.961 min, Period: 1, Cycle(s): 6025 (Experiment 2)
3	2::Q50341	sp|Q50341|MPN_142 Mgp-operon protein 3 Tax_Id=272634 [Mycoplasma pneumoniae (strain ATCC 29342 / M129)]	451	130378	8	2	8	2	191	1	1	1	889.461	1776.91	2	1776.86	0.0495	0	53.74	4.5	K	LNESWPVYEPLDSTK	E				File: MPN 2D_41.wiff, Sample: 20130524 MPN 2D_41 (sample number 1), Elution: 29.056 min, Period: 1, Cycle(s): 6067 (Experiment 4)
3	2::Q50341	sp|Q50341|MPN_142 Mgp-operon protein 3 Tax_Id=272634 [Mycoplasma pneumoniae (strain ATCC 29342 / M129)]	451	130378	8	2	8	2	195	1	1	1	910.954	1819.89	2	1819.83	0.0673	0	41.18	83	K	TTAENDAPLVGMVGSGAAGS	A	Oxidation (M)	0.00000000000200000000.0		File: MPN 2D_41.wiff, Sample: 20130524 MPN 2D_41 (sample number 1), Elution: 27.822 min, Period: 1, Cycle(s): 6019 (Experiment 4)
3	2::Q50341	sp|Q50341|MPN_142 Mgp-operon protein 3 Tax_Id=272634 [Mycoplasma pneumoniae (strain ATCC 29342 / M129)]	451	130378	8	2	8	2	203	1	1	1	799.467	2395.38	3	2395.27	0.1054	0	59.84	0.98	K	TLQDLLVEQPVTPYTPNAGLAR	V				File: MPN 2D_41.wiff, Sample: 20130524 MPN 2D_41 (sample number 1), Elution: 29.377 to 29.484 min, Period: 1, Cycle(s): 6077, 6079 (Experiment 2)
3	2::Q50341	sp|Q50341|MPN_142 Mgp-operon protein 3 Tax_Id=272634 [Mycoplasma pneumoniae (strain ATCC 29342 / M129)]	451	130378	8	2	8	2	204	1	1	1	956.821	2867.44	3	2867.31	0.1307	0	98.26	0.00022	K	ALNGSQSGSSDTSGSNSQDFASYVLIFK	A	Deamidated (NQ)	0.0010000000000000000000000000.0		File: MPN 2D_41.wiff, Sample: 20130524 MPN 2D_41 (sample number 1), Elution: 30.006 to 30.089 min, Period: 1, Cycle(s): 6112, 6121 (Experiment 2)
3	2::Q50341	sp|Q50341|MPN_142 Mgp-operon protein 3 Tax_Id=272634 [Mycoplasma pneumoniae (strain ATCC 29342 / M129)]	451	130378	8	2	8	2	205	1	1	1	974.465	2920.37	3	2920.26	0.1146	0	76.27	0.035	K	FQDTTSSDQSNTNQNALSFDTQESQK	A				File: MPN 2D_41.wiff, Sample: 20130524 MPN 2D_41 (sample number 1), Elution: 27.685 to 27.743 min, Period: 1, Cycle(s): 6016 (Experiment 3), 6014 (Experiment 4)
Found in gel mass range 11 kDa and at pI >7.0
Peak list data path	C:\Analyst Data\Projects\Mycoplasma\Michael\Pneumoniae\MPN 2D_84.wiff
Peak list format	Mascot generic
Search type	MIS
Mascot version	2.4.1
Database	1::contaminants 2::LudwigNR
Fasta file	1::contaminants_all_09092011.fasta 2::LudwigNR_Q213_generic_forward.fasta
Total sequences	21307050
Total residues	7688062380
Sequences after taxonomy filter	13213406
Number of queries	305
Warning	No taxonomy indexes for contaminants, taxonomy ~Bacteria (Eubacteria)~ ignored. Searching all entries in contaminants
Variable modifications	--------------------------------------------------------
Identifier	Name	Delta	Neutral loss(es)
1	Deamidated (NQ)	0.984016
2	Oxidation (M)	15.9949	0	63.9983
3	Propionamide (C)	71.0371
Search Parameters	--------------------------------------------------------
Taxonomy filter	. . Bacteria (Eubacteria)
Enzyme	semiTrypsin
Maximum Missed Cleavages	3
Fixed modifications
Variable modifications	Deamidated (NQ),Oxidation (M),Propionamide (C)
Peptide Mass Tolerance	100
Peptide Mass Tolerance Units	ppm
Fragment Mass Tolerance	0.2
Fragment Mass Tolerance Units	Da
Mass values	Monoisotopic
Instrument type	ESI-QUAD-TOF
Format parameters	--------------------------------------------------------
Significance threshold	0.05
Max. number of hits	0
Use MudPIT protein scoring	0
Ions score cut-off	0
Include same-set proteins	0
Include sub-set proteins	0
Include unassigned	0
Require bold red	1
Use homology threshold	0
Group protein families	0
Protein hits	--------------------------------------------------------
prot_hit_num	prot_acc	prot_desc	prot_score	prot_mass	prot_matches	prot_matches_sig	prot_sequences	prot_sequences_sig	pep_query	pep_rank	pep_isbold	pep_isunique	pep_exp_mz	pep_exp_mr	pep_exp_z	pep_calc_mr	pep_delta	pep_miss	pep_score	pep_expect	pep_res_before	pep_seq	pep_res_after	pep_var_mod	pep_var_mod_pos	pep_summed_mod_pos	pep_scan_title
5	2::Q50341	sp|Q50341|MPN_142 Mgp-operon protein 3 Tax_Id=272634 [Mycoplasma pneumoniae (strain ATCC 29342 / M129)]	307	130378	4	2	4	2	155	1	1	1	642.842	1283.67	2	1283.64	0.0293	0	34.36	290	K	LQDSSFVDVFK	K				File: MPN 2D_84.wiff, Sample: MPN 2D_84 (sample number 1), Elution: 27.361 to 27.694 min, Period: 1, Cycle(s): 5477, 5491 (Experiment 2), 5487 (Experiment 4)
5	2::Q50341	sp|Q50341|MPN_142 Mgp-operon protein 3 Tax_Id=272634 [Mycoplasma pneumoniae (strain ATCC 29342 / M129)]	307	130378	4	2	4	2	171	1	1	1	677.385	1352.76	2	1352.72	0.0367	0	99.04	8.4e-05	K	VDTLTTAVGSVYK	K				File: MPN 2D_84.wiff, Sample: MPN 2D_84 (sample number 1), Elution: 26.297 min, Period: 1, Cycle(s): 5433 (Experiment 2)
5	2::Q50341	sp|Q50341|MPN_142 Mgp-operon protein 3 Tax_Id=272634 [Mycoplasma pneumoniae (strain ATCC 29342 / M129)]	307	130378	4	2	4	2	218	1	1	1	741.429	1480.84	2	1480.81	0.0291	1	128.14	1e-07	K	KVDTLTTAVGSVYK	K				File: MPN 2D_84.wiff, Sample: MPN 2D_84 (sample number 1), Elution: 25.962 min, Period: 1, Cycle(s): 5420 (Experiment 4)
5	2::Q50341	sp|Q50341|MPN_142 Mgp-operon protein 3 Tax_Id=272634 [Mycoplasma pneumoniae (strain ATCC 29342 / M129)]	307	130378	4	2	4	2	275	1	1	1	960.092	1918.17	2	1918.12	0.0543	0	53.21	2.3	K	APVKPAAPTAPRPPVQPPK	K				File: MPN 2D_84.wiff, Sample: MPN 2D_84 (sample number 1), Elution: 23.569 to 23.664 min, Period: 1, Cycle(s): 5190, 5200 (Experiment 2)
Found in gel mass range 55 kDa and at pI 4.5-4.7
Peak list data path	C:\Analyst Data\Projects\Mycoplasma\Michael\20130626 MPN2D 6to11\MPN 2D_11.wiff
Peak list format	Mascot generic
Search type	MIS
Mascot version	2.4.1
Database	1::contaminants 2::LudwigNR
Fasta file	1::contaminants_all_09092011.fasta 2::LudwigNR_Q213_generic_forward.fasta
Total sequences	21307050
Total residues	7688062380
Sequences after taxonomy filter	13213406
Number of queries	276
Warning	No taxonomy indexes for contaminants, taxonomy ~Bacteria (Eubacteria)~ ignored. Searching all entries in contaminants
Variable modifications	--------------------------------------------------------
Identifier	Name	Delta	Neutral loss(es)
1	Deamidated (NQ)	0.984016
2	Oxidation (M)	15.9949	0	63.9983
3	Propionamide (C)	71.0371
Search Parameters	--------------------------------------------------------
Taxonomy filter	. . Bacteria (Eubacteria)
Enzyme	semiTrypsin
Maximum Missed Cleavages	3
Fixed modifications
Variable modifications	Deamidated (NQ),Oxidation (M),Propionamide (C)
Peptide Mass Tolerance	100
Peptide Mass Tolerance Units	ppm
Fragment Mass Tolerance	0.2
Fragment Mass Tolerance Units	Da
Mass values	Monoisotopic
Instrument type	ESI-QUAD-TOF
Format parameters	--------------------------------------------------------
Significance threshold	0.05
Max. number of hits	0
Use MudPIT protein scoring	0
Ions score cut-off	0
Include same-set proteins	0
Include sub-set proteins	0
Include unassigned	0
Require bold red	1
Use homology threshold	0
Group protein families	0
Protein hits	--------------------------------------------------------
prot_hit_num	prot_acc	prot_desc	prot_score	prot_mass	prot_matches	prot_matches_sig	prot_sequences	prot_sequences_sig	pep_query	pep_rank	pep_isbold	pep_isunique	pep_exp_mz	pep_exp_mr	pep_exp_z	pep_calc_mr	pep_delta	pep_miss	pep_score	pep_expect	pep_res_before	pep_seq	pep_res_after	pep_var_mod	pep_var_mod_pos	pep_summed_mod_pos	pep_scan_title
1	2::Q50341	sp|Q50341|MPN_142 Mgp-operon protein 3 Tax_Id=272634 [Mycoplasma pneumoniae (strain ATCC 29342 / M129)]	817	130378	14	7	12	6	55	7	1	1	456.273	910.531	2	910.56	-0.0288	0	30.11	290	A	VTVVAGPLR	A				File: MPN 2D_11.wiff, Sample: 20130424 MPN 2D_11 (sample number 1), Elution: 30.145 min, Period: 1, Cycle(s): 6290 (Experiment 4)
1	2::Q50341	sp|Q50341|MPN_142 Mgp-operon protein 3 Tax_Id=272634 [Mycoplasma pneumoniae (strain ATCC 29342 / M129)]	817	130378	14	7	12	6	68	4	1	1	476.755	951.494	2	951.514	-0.0194	0	52.42	3.2	K	AGVDPAPVAR	G				File: MPN 2D_11.wiff, Sample: 20130424 MPN 2D_11 (sample number 1), Elution: 28.026 min, Period: 1, Cycle(s): 6203 (Experiment 2)
1	2::Q50341	sp|Q50341|MPN_142 Mgp-operon protein 3 Tax_Id=272634 [Mycoplasma pneumoniae (strain ATCC 29342 / M129)]	817	130378	14	7	12	6	100	4	1	1	491.795	981.576	2	981.597	-0.021	0	51.52	2.2	R	AVTVVAGPLR	A				File: MPN 2D_11.wiff, Sample: 20130424 MPN 2D_11 (sample number 1), Elution: 30.368 min, Period: 1, Cycle(s): 6298 (Experiment 4)
1	2::Q50341	sp|Q50341|MPN_142 Mgp-operon protein 3 Tax_Id=272634 [Mycoplasma pneumoniae (strain ATCC 29342 / M129)]	817	130378	14	7	12	6	131	1	1	1	548.255	1094.49	2	1094.51	-0.0197	0	43.68	25	K	FTPAFDNQR	A				File: MPN 2D_11.wiff, Sample: 20130424 MPN 2D_11 (sample number 1), Elution: 29.611 to 29.866 min, Period: 1, Cycle(s): 6273, 6277, 6282 (Experiment 2)
1	2::Q50341	sp|Q50341|MPN_142 Mgp-operon protein 3 Tax_Id=272634 [Mycoplasma pneumoniae (strain ATCC 29342 / M129)]	817	130378	14	7	12	6	165	1	1	1	605.309	1208.6	2	1208.62	-0.0145	0	59.97	0.74	K	QFVENQLGFK	D				File: MPN 2D_11.wiff, Sample: 20130424 MPN 2D_11 (sample number 1), Elution: 30.822 to 31.005 min, Period: 1, Cycle(s): 6318, 6322 (Experiment 2), 6314 (Experiment 3)
1	2::Q50341	sp|Q50341|MPN_142 Mgp-operon protein 3 Tax_Id=272634 [Mycoplasma pneumoniae (strain ATCC 29342 / M129)]	817	130378	14	7	12	6	166	1	1	1	605.312	1208.61	2	1208.62	-0.0099	0	46.48	16	K	QFVENQLGFK	D				File: MPN 2D_11.wiff, Sample: 20130424 MPN 2D_11 (sample number 1), Elution: 31.775 to 32.263 min, Period: 1, Cycle(s): 6384 (Experiment 2), 6377, 6387, 6393 (Experiment 3), 6380 (Experiment 4)
1	2::Q50341	sp|Q50341|MPN_142 Mgp-operon protein 3 Tax_Id=272634 [Mycoplasma pneumoniae (strain ATCC 29342 / M129)]	817	130378	14	7	12	6	182	1	1	1	645.827	1289.64	2	1289.67	-0.0331	0	84.97	0.0028	R	VDFAANSVLQAR	N				File: MPN 2D_11.wiff, Sample: 20130424 MPN 2D_11 (sample number 1), Elution: 30.523 to 30.99 min, Period: 1, Cycle(s): 6305, 6308, 6311, 6321 (Experiment 2), 6317 (Experiment 3)
1	2::Q50341	sp|Q50341|MPN_142 Mgp-operon protein 3 Tax_Id=272634 [Mycoplasma pneumoniae (strain ATCC 29342 / M129)]	817	130378	14	7	12	6	183	1	1	1	645.827	1289.64	2	1289.67	-0.0331	0	79.67	0.0095	R	VDFAANSVLQAR	N				File: MPN 2D_11.wiff, Sample: 20130424 MPN 2D_11 (sample number 1), Elution: 31.355 to 32.016 min, Period: 1, Cycle(s): 6359, 6368, 6387 (Experiment 2), 6349, 6375, 6380, 6384 (Experiment 3), 6372 (Experiment 4)
1	2::Q50341	sp|Q50341|MPN_142 Mgp-operon protein 3 Tax_Id=272634 [Mycoplasma pneumoniae (strain ATCC 29342 / M129)]	817	130378	14	7	12	6	184	1	1	1	646.33	1290.65	2	1290.67	-0.021	0	77.94	0.014	F	GSAESAVDLTTLK	D				File: MPN 2D_11.wiff, Sample: 20130424 MPN 2D_11 (sample number 1), Elution: 29.801 min, Period: 1, Cycle(s): 6279 (Experiment 4)
1	2::Q50341	sp|Q50341|MPN_142 Mgp-operon protein 3 Tax_Id=272634 [Mycoplasma pneumoniae (strain ATCC 29342 / M129)]	817	130378	14	7	12	6	193	1	1	1	677.345	1352.68	2	1352.72	-0.0428	0	97.57	0.00014	K	VDTLTTAVGSVYK	K				File: MPN 2D_11.wiff, Sample: 20130424 MPN 2D_11 (sample number 1), Elution: 30.193 to 30.391 min, Period: 1, Cycle(s): 6296, 6299 (Experiment 3), 6292 (Experiment 4)
1	2::Q50341	sp|Q50341|MPN_142 Mgp-operon protein 3 Tax_Id=272634 [Mycoplasma pneumoniae (strain ATCC 29342 / M129)]	817	130378	14	7	12	6	224	1	1	1	741.396	1480.78	2	1480.81	-0.036	1	110.91	7e-06	K	KVDTLTTAVGSVYK	K				File: MPN 2D_11.wiff, Sample: 20130424 MPN 2D_11 (sample number 1), Elution: 31.797 min, Period: 1, Cycle(s): 6379 (Experiment 2)
1	2::Q50341	sp|Q50341|MPN_142 Mgp-operon protein 3 Tax_Id=272634 [Mycoplasma pneumoniae (strain ATCC 29342 / M129)]	817	130378	14	7	12	6	247	1	1	1	825.366	1648.72	2	1648.73	-0.0076	0	74.57	0.029	K	IEYLDGNFYGEDSK	I				File: MPN 2D_11.wiff, Sample: 20130424 MPN 2D_11 (sample number 1), Elution: 30.494 to 30.597 min, Period: 1, Cycle(s): 6304, 6307 (Experiment 2)
1	2::Q50341	sp|Q50341|MPN_142 Mgp-operon protein 3 Tax_Id=272634 [Mycoplasma pneumoniae (strain ATCC 29342 / M129)]	817	130378	14	7	12	6	254	1	1	1	875.909	1749.8	2	1749.82	-0.0138	0	115.35	2.9e-06	K	GGSQNNEEVQTTYPVK	S				File: MPN 2D_11.wiff, Sample: 20130424 MPN 2D_11 (sample number 1), Elution: 28.009 to 28.223 min, Period: 1, Cycle(s): 6201, 6208-6209, 6212 (Experiment 2)
1	2::Q50341	sp|Q50341|MPN_142 Mgp-operon protein 3 Tax_Id=272634 [Mycoplasma pneumoniae (strain ATCC 29342 / M129)]	817	130378	14	7	12	6	267	1	1	1	640.374	1918.1	3	1918.12	-0.014	0	41.6	59	K	APVKPAAPTAPRPPVQPPK	K				File: MPN 2D_11.wiff, Sample: 20130424 MPN 2D_11 (sample number 1), Elution: 30.582 to 30.773 min, Period: 1, Cycle(s): 6309 (Experiment 2), 6306 (Experiment 3), 6312 (Experiment 4)
Found in gel mass range 80 kDa and pI 4.9
Peak list data path	C:\Analyst Data\Projects\Mycoplasma\Michael\Pneumoniae\20130413 MPN Plasminogen Binding\MPN Plasminogen Binding_12.wiff
Peak list format	Mascot generic
Search type	MIS
Mascot version	2.4.1
Database	1::contaminants 2::LudwigNR
Fasta file	1::contaminants_all_09092011.fasta 2::LudwigNR_Q113_generic_forward.fasta
Total sequences	19263279
Total residues	6990931504
Sequences after taxonomy filter	11991699
Number of queries	539
Warning	No taxonomy indexes for contaminants, taxonomy ~Bacteria (Eubacteria)~ ignored. Searching all entries in contaminants
Variable modifications	--------------------------------------------------------
Identifier	Name	Delta	Neutral loss(es)
1	Deamidated (NQ)	0.984016
2	Oxidation (M)	15.9949	0	63.9983
3	Propionamide (C)	71.0371
Search Parameters	--------------------------------------------------------
Taxonomy filter	. . Bacteria (Eubacteria)
Enzyme	semiTrypsin
Maximum Missed Cleavages	3
Fixed modifications
Variable modifications	Deamidated (NQ),Oxidation (M),Propionamide (C)
Peptide Mass Tolerance	100
Peptide Mass Tolerance Units	ppm
Fragment Mass Tolerance	0.2
Fragment Mass Tolerance Units	Da
Mass values	Monoisotopic
Instrument type	ESI-QUAD-TOF
Format parameters	--------------------------------------------------------
Significance threshold	0.05
Max. number of hits	0
Use MudPIT protein scoring	0
Ions score cut-off	0
Include same-set proteins	0
Include sub-set proteins	0
Include unassigned	0
Require bold red	1
Use homology threshold	0
Group protein families	0
Protein hits	--------------------------------------------------------
prot_hit_num	prot_acc	prot_desc	prot_score	prot_mass	prot_matches	prot_matches_sig	prot_sequences	prot_sequences_sig	pep_query	pep_rank	pep_isbold	pep_isunique	pep_exp_mz	pep_exp_mr	pep_exp_z	pep_calc_mr	pep_delta	pep_miss	pep_score	pep_expect	pep_res_before	pep_seq	pep_res_after	pep_var_mod	pep_var_mod_pos	pep_summed_mod_pos	pep_scan_title
4	2::Q50341	sp|Q50341|MPN_142 Mgp-operon protein 3 Tax_Id=272634 [Mycoplasma pneumoniae (strain ATCC 29342 / M129)]	1712	130378	25	11	24	11	66	2	1	1	456.291	910.567	2	910.56	0.0071	0	44.76	5.5	A	VTVVAGPLR	A				File: MPN Plasminogen Binding_12.wiff, Sample: 20130412 MPN Plasminogen Binding_12 (sample number 1), Elution: 22.498 min, Period: 1, Cycle(s): 4625 (Experiment 3)
4	2::Q50341	sp|Q50341|MPN_142 Mgp-operon protein 3 Tax_Id=272634 [Mycoplasma pneumoniae (strain ATCC 29342 / M129)]	1712	130378	25	11	24	11	94	8	1	1	491.817	981.619	2	981.597	0.0215	0	54.58	0.55	R	AVTVVAGPLR	A				File: MPN Plasminogen Binding_12.wiff, Sample: 20130412 MPN Plasminogen Binding_12 (sample number 1), Elution: 22.934 min, Period: 1, Cycle(s): 4683 (Experiment 2)
4	2::Q50341	sp|Q50341|MPN_142 Mgp-operon protein 3 Tax_Id=272634 [Mycoplasma pneumoniae (strain ATCC 29342 / M129)]	1712	130378	25	11	24	11	101	7	1	1	501.826	1001.64	2	1001.61	0.0257	0	41.38	23	K	IITQTSVIK	K				File: MPN Plasminogen Binding_12.wiff, Sample: 20130412 MPN Plasminogen Binding_12 (sample number 1), Elution: 21.265 min, Period: 1, Cycle(s): 4550 (Experiment 2)
4	2::Q50341	sp|Q50341|MPN_142 Mgp-operon protein 3 Tax_Id=272634 [Mycoplasma pneumoniae (strain ATCC 29342 / M129)]	1712	130378	25	11	24	11	126	1	1	1	532.268	1062.52	2	1062.5	0.0228	0	53.87	2.8	R	LNFNPDTDK	L				File: MPN Plasminogen Binding_12.wiff, Sample: 20130412 MPN Plasminogen Binding_12 (sample number 1), Elution: 21.004 min, Period: 1, Cycle(s): 4517 (Experiment 2)
4	2::Q50341	sp|Q50341|MPN_142 Mgp-operon protein 3 Tax_Id=272634 [Mycoplasma pneumoniae (strain ATCC 29342 / M129)]	1712	130378	25	11	24	11	140	1	1	1	547.334	1092.65	2	1092.63	0.0242	1	73.3	0.017	R	KGYAVITVSR	T				File: MPN Plasminogen Binding_12.wiff, Sample: 20130412 MPN Plasminogen Binding_12 (sample number 1), Elution: 21.609 min, Period: 1, Cycle(s): 4595 (Experiment 2)
4	2::Q50341	sp|Q50341|MPN_142 Mgp-operon protein 3 Tax_Id=272634 [Mycoplasma pneumoniae (strain ATCC 29342 / M129)]	1712	130378	25	11	24	11	141	4	1	1	548.271	1094.53	2	1094.51	0.0136	0	40.87	48	K	FTPAFDNQR	A				File: MPN Plasminogen Binding_12.wiff, Sample: 20130412 MPN Plasminogen Binding_12 (sample number 1), Elution: 21.436 min, Period: 1, Cycle(s): 4574 (Experiment 2)
4	2::Q50341	sp|Q50341|MPN_142 Mgp-operon protein 3 Tax_Id=272634 [Mycoplasma pneumoniae (strain ATCC 29342 / M129)]	1712	130378	25	11	24	11	192	1	1	1	605.326	1208.64	2	1208.62	0.0175	0	63.8	0.27	K	QFVENQLGFK	D				File: MPN Plasminogen Binding_12.wiff, Sample: 20130412 MPN Plasminogen Binding_12 (sample number 1), Elution: 24.152 min, Period: 1, Cycle(s): 4713 (Experiment 3)
4	2::Q50341	sp|Q50341|MPN_142 Mgp-operon protein 3 Tax_Id=272634 [Mycoplasma pneumoniae (strain ATCC 29342 / M129)]	1712	130378	25	11	24	11	210	1	1	1	642.835	1283.66	2	1283.64	0.0161	0	50.38	6.6	K	LQDSSFVDVFK	K				File: MPN Plasminogen Binding_12.wiff, Sample: 20130412 MPN Plasminogen Binding_12 (sample number 1), Elution: 25.343 to 25.592 min, Period: 1, Cycle(s): 4757, 4767 (Experiment 3)
4	2::Q50341	sp|Q50341|MPN_142 Mgp-operon protein 3 Tax_Id=272634 [Mycoplasma pneumoniae (strain ATCC 29342 / M129)]	1712	130378	25	11	24	11	211	1	1	1	646.347	1290.68	2	1290.66	0.0232	0	58.72	1	R	VDFAANSVLQAR	N	Deamidated (NQ)	0.000001000000.0		File: MPN Plasminogen Binding_12.wiff, Sample: 20130412 MPN Plasminogen Binding_12 (sample number 1), Elution: 23.459 to 24.416 min, Period: 1, Cycle(s): 4713 (Experiment 2), 4698 (Experiment 3), 4706, 4720 (Experiment 4)
4	2::Q50341	sp|Q50341|MPN_142 Mgp-operon protein 3 Tax_Id=272634 [Mycoplasma pneumoniae (strain ATCC 29342 / M129)]	1712	130378	25	11	24	11	242	1	1	0	677.381	1352.75	2	1352.72	0.0278	0	107.4	1.1e-05	K	VDTLTTAVGSVYK	K				File: MPN Plasminogen Binding_12.wiff, Sample: 20130412 MPN Plasminogen Binding_12 (sample number 1), Elution: 24.013 min, Period: 1, Cycle(s): 4710 (Experiment 2)
4	2::Q50341	sp|Q50341|MPN_142 Mgp-operon protein 3 Tax_Id=272634 [Mycoplasma pneumoniae (strain ATCC 29342 / M129)]	1712	130378	25	11	24	11	255	1	1	1	694.82	1387.63	2	1387.62	0.0098	0	75.17	0.022	Y	YYSANFPEAGNR	R				File: MPN Plasminogen Binding_12.wiff, Sample: 20130412 MPN Plasminogen Binding_12 (sample number 1), Elution: 21.604 min, Period: 1, Cycle(s): 4594 (Experiment 3)
4	2::Q50341	sp|Q50341|MPN_142 Mgp-operon protein 3 Tax_Id=272634 [Mycoplasma pneumoniae (strain ATCC 29342 / M129)]	1712	130378	25	11	24	11	258	1	1	1	706.887	1411.76	2	1411.73	0.024	1	107.99	1.2e-05	R	KLQDSSFVDVFK	K				File: MPN Plasminogen Binding_12.wiff, Sample: 20130412 MPN Plasminogen Binding_12 (sample number 1), Elution: 25.084 min, Period: 1, Cycle(s): 4746 (Experiment 3)
4	2::Q50341	sp|Q50341|MPN_142 Mgp-operon protein 3 Tax_Id=272634 [Mycoplasma pneumoniae (strain ATCC 29342 / M129)]	1712	130378	25	11	24	11	259	1	1	1	706.907	1411.8	2	1411.78	0.0166	0	66.67	0.13	K	IAGIPLNIDFPSR	I				File: MPN Plasminogen Binding_12.wiff, Sample: 20130412 MPN Plasminogen Binding_12 (sample number 1), Elution: 25.678 min, Period: 1, Cycle(s): 4771 (Experiment 2)
4	2::Q50341	sp|Q50341|MPN_142 Mgp-operon protein 3 Tax_Id=272634 [Mycoplasma pneumoniae (strain ATCC 29342 / M129)]	1712	130378	25	11	24	11	271	1	1	1	727.429	1452.84	2	1452.82	0.024	0	69.97	0.053	R	GHKPNYSAVLLVR	G				File: MPN Plasminogen Binding_12.wiff, Sample: 20130412 MPN Plasminogen Binding_12 (sample number 1), Elution: 24.111 min, Period: 1, Cycle(s): 4712 (Experiment 3)
4	2::Q50341	sp|Q50341|MPN_142 Mgp-operon protein 3 Tax_Id=272634 [Mycoplasma pneumoniae (strain ATCC 29342 / M129)]	1712	130378	25	11	24	11	276	1	1	0	741.432	1480.85	2	1480.81	0.0346	1	161.5	4.2e-11	K	KVDTLTTAVGSVYK	K				File: MPN Plasminogen Binding_12.wiff, Sample: 20130412 MPN Plasminogen Binding_12 (sample number 1), Elution: 23.537 min, Period: 1, Cycle(s): 4700 (Experiment 2)
4	2::Q50341	sp|Q50341|MPN_142 Mgp-operon protein 3 Tax_Id=272634 [Mycoplasma pneumoniae (strain ATCC 29342 / M129)]	1712	130378	25	11	24	11	308	1	1	1	825.38	1648.75	2	1648.73	0.0206	0	89.98	0.00084	K	IEYLDGNFYGEDSK	I				File: MPN Plasminogen Binding_12.wiff, Sample: 20130412 MPN Plasminogen Binding_12 (sample number 1), Elution: 24.284 min, Period: 1, Cycle(s): 4717 (Experiment 2)
4	2::Q50341	sp|Q50341|MPN_142 Mgp-operon protein 3 Tax_Id=272634 [Mycoplasma pneumoniae (strain ATCC 29342 / M129)]	1712	130378	25	11	24	11	326	1	1	1	910.993	1819.97	2	1819.96	0.0156	0	81.08	0.0074	R	TDQLLVYGIVNESELK	S				File: MPN Plasminogen Binding_12.wiff, Sample: 20130412 MPN Plasminogen Binding_12 (sample number 1), Elution: 25.617 min, Period: 1, Cycle(s): 4768 (Experiment 3)
4	2::Q50341	sp|Q50341|MPN_142 Mgp-operon protein 3 Tax_Id=272634 [Mycoplasma pneumoniae (strain ATCC 29342 / M129)]	1712	130378	25	11	24	11	336	1	1	1	640.387	1918.14	3	1918.12	0.0226	0	44.87	20	K	APVKPAAPTAPRPPVQPPK	K				File: MPN Plasminogen Binding_12.wiff, Sample: 20130412 MPN Plasminogen Binding_12 (sample number 1), Elution: 20.571 min, Period: 1, Cycle(s): 4450 (Experiment 2)
4	2::Q50341	sp|Q50341|MPN_142 Mgp-operon protein 3 Tax_Id=272634 [Mycoplasma pneumoniae (strain ATCC 29342 / M129)]	1712	130378	25	11	24	11	338	1	1	1	640.399	1918.17	3	1918.12	0.0586	0	44.16	16	K	APVKPAAPTAPRPPVQPPK	K				File: MPN Plasminogen Binding_12.wiff, Sample: 20130412 MPN Plasminogen Binding_12 (sample number 1), Elution: 20.738 min, Period: 1, Cycle(s): 4478 (Experiment 2)
4	2::Q50341	sp|Q50341|MPN_142 Mgp-operon protein 3 Tax_Id=272634 [Mycoplasma pneumoniae (strain ATCC 29342 / M129)]	1712	130378	25	11	24	11	343	1	1	1	975.972	1949.93	2	1949.93	-0.0031	1	89.23	0.0012	K	NTNGLFEKDDQLSENVK	R				File: MPN Plasminogen Binding_12.wiff, Sample: 20130412 MPN Plasminogen Binding_12 (sample number 1), Elution: 23.074 to 23.405 min, Period: 1, Cycle(s): 4686, 4692 (Experiment 2), 4697 (Experiment 4)
4	2::Q50341	sp|Q50341|MPN_142 Mgp-operon protein 3 Tax_Id=272634 [Mycoplasma pneumoniae (strain ATCC 29342 / M129)]	1712	130378	25	11	24	11	346	1	1	1	990.058	1978.1	2	1978	0.0969	0	55.98	2.3	K	TVDEVINNPDILQSFFK	F				File: MPN Plasminogen Binding_12.wiff, Sample: 20130412 MPN Plasminogen Binding_12 (sample number 1), Elution: 26.248 to 26.615 min, Period: 1, Cycle(s): 4792, 4797, 4802 (Experiment 2)
4	2::Q50341	sp|Q50341|MPN_142 Mgp-operon protein 3 Tax_Id=272634 [Mycoplasma pneumoniae (strain ATCC 29342 / M129)]	1712	130378	25	11	24	11	357	1	1	1	1015.52	2029.03	2	2029.03	0.0027	0	78.44	0.015	R	DNGLVPIYNEGIVDIWGR	V				File: MPN Plasminogen Binding_12.wiff, Sample: 20130412 MPN Plasminogen Binding_12 (sample number 1), Elution: 26.334 min, Period: 1, Cycle(s): 4794 (Experiment 3)
4	2::Q50341	sp|Q50341|MPN_142 Mgp-operon protein 3 Tax_Id=272634 [Mycoplasma pneumoniae (strain ATCC 29342 / M129)]	1712	130378	25	11	24	11	421	1	1	1	828.776	2483.31	3	2483.25	0.0517	0	106.9	2.5e-05	K	ISTLESQATDGFANSLLNFGTGLK	A				File: MPN Plasminogen Binding_12.wiff, Sample: 20130412 MPN Plasminogen Binding_12 (sample number 1), Elution: 26.356 to 26.476 min, Period: 1, Cycle(s): 4795 (Experiment 2), 4798 (Experiment 3)
4	2::Q50341	sp|Q50341|MPN_142 Mgp-operon protein 3 Tax_Id=272634 [Mycoplasma pneumoniae (strain ATCC 29342 / M129)]	1712	130378	25	11	24	11	459	1	1	1	1331.16	2660.3	2	2660.29	0.0122	0	64.17	0.49	K	NSEPISFSYTPFGSAESAVDLTTLK	D				File: MPN Plasminogen Binding_12.wiff, Sample: 20130412 MPN Plasminogen Binding_12 (sample number 1), Elution: 25.992 min, Period: 1, Cycle(s): 4782 (Experiment 3)
4	2::Q50341	sp|Q50341|MPN_142 Mgp-operon protein 3 Tax_Id=272634 [Mycoplasma pneumoniae (strain ATCC 29342 / M129)]	1712	130378	25	11	24	11	523	1	1	1	1147.95	3440.83	3	3440.74	0.0909	0	83	0.0069	K	ALVENTAGLNGPINGLFTLLDTFAYVTPVSGMK	G	2 Deamidated (NQ); Oxidation (M)	0.000000000100010000000000000000020.0		File: MPN Plasminogen Binding_12.wiff, Sample: 20130412 MPN Plasminogen Binding_12 (sample number 1), Elution: 28.473 min, Period: 1, Cycle(s): 4936 (Experiment 2)
Found in gel mass range 50 kDa and pI 8.8
Peak list data path	C:\Analyst Data\Projects\Mycoplasma\Michael\20130626 MPN2D 6to11\MPN 2D_35.wiff
Peak list format	Mascot generic
Search type	MIS
Mascot version	2.4.1
Database	1::contaminants 2::LudwigNR
Fasta file	1::contaminants_all_09092011.fasta 2::LudwigNR_Q213_generic_forward.fasta
Total sequences	21307050
Total residues	7688062380
Sequences after taxonomy filter	13213406
Number of queries	138
Warning	No taxonomy indexes for contaminants, taxonomy ~Bacteria (Eubacteria)~ ignored. Searching all entries in contaminants
Variable modifications	--------------------------------------------------------
Identifier	Name	Delta	Neutral loss(es)
1	Deamidated (NQ)	0.984016
2	Oxidation (M)	15.9949	0	63.9983
3	Propionamide (C)	71.0371
Search Parameters	--------------------------------------------------------
Taxonomy filter	. . Bacteria (Eubacteria)
Enzyme	semiTrypsin
Maximum Missed Cleavages	3
Fixed modifications
Variable modifications	Deamidated (NQ),Oxidation (M),Propionamide (C)
Peptide Mass Tolerance	100
Peptide Mass Tolerance Units	ppm
Fragment Mass Tolerance	0.2
Fragment Mass Tolerance Units	Da
Mass values	Monoisotopic
Instrument type	ESI-QUAD-TOF
Format parameters	--------------------------------------------------------
Significance threshold	0.05
Max. number of hits	0
Use MudPIT protein scoring	0
Ions score cut-off	0
Include same-set proteins	0
Include sub-set proteins	0
Include unassigned	0
Require bold red	0
Use homology threshold	0
Group protein families	0
Protein hits	--------------------------------------------------------
prot_hit_num	prot_acc	prot_desc	prot_score	prot_mass	prot_matches	prot_matches_sig	prot_sequences	prot_sequences_sig	pep_query	pep_rank	pep_isbold	pep_isunique	pep_exp_mz	pep_exp_mr	pep_exp_z	pep_calc_mr	pep_delta	pep_miss	pep_score	pep_expect	pep_res_before	pep_seq	pep_res_after	pep_var_mod	pep_var_mod_pos	pep_summed_mod_pos	pep_scan_title
1	2::H0PQK5	tr|H0PQK5|MPNA3660 Cytadherence-related protein ORF6 homolog Tax_Id=1112856 [Mycoplasma pneumoniae 309]	80	44277	1	1	1	1	132	1	1	1	838.907	1675.8	2	1675.77	0.027	0	81.57	0.0071	K	TTAENDAPLVGMVGSGAA	G	Oxidation (M)	0.000000000002000000.0		File: MPN 2D_35.wiff, Sample: 20130424 MPN 2D_35 (sample number 1), Elution: 27.25 min, Period: 1, Cycle(s): 6050 (Experiment 2)
Found in gel mass range 34 kDa and pI 6.9
Peak list data path	C:\Analyst Data\Projects\Mycoplasma\Michael\20130626 MPN2D 6to11\20130626MPN2D_52.wiff
Peak list format	Mascot generic
Search type	MIS
Mascot version	2.4.1
Database	1::contaminants 2::LudwigNR
Fasta file	1::contaminants_all_09092011.fasta 2::LudwigNR_Q213_generic_forward.fasta
Total sequences	21307050
Total residues	7688062380
Sequences after taxonomy filter	13213406
Number of queries	171
Warning	No taxonomy indexes for contaminants, taxonomy ~Bacteria (Eubacteria)~ ignored. Searching all entries in contaminants
Variable modifications	--------------------------------------------------------
Identifier	Name	Delta	Neutral loss(es)
1	Deamidated (NQ)	0.984016
2	Oxidation (M)	15.9949	0	63.9983
3	Propionamide (C)	71.0371
Search Parameters	--------------------------------------------------------
Taxonomy filter	. . Bacteria (Eubacteria)
Enzyme	semiTrypsin
Maximum Missed Cleavages	3
Fixed modifications
Variable modifications	Deamidated (NQ),Oxidation (M),Propionamide (C)
Peptide Mass Tolerance	100
Peptide Mass Tolerance Units	ppm
Fragment Mass Tolerance	0.2
Fragment Mass Tolerance Units	Da
Mass values	Monoisotopic
Instrument type	ESI-QUAD-TOF
Format parameters	--------------------------------------------------------
Significance threshold	0.05
Max. number of hits	0
Use MudPIT protein scoring	0
Ions score cut-off	0
Include same-set proteins	0
Include sub-set proteins	0
Include unassigned	0
Require bold red	0
Use homology threshold	0
Group protein families	0
Protein hits	--------------------------------------------------------
prot_hit_num	prot_acc	prot_desc	prot_score	prot_mass	prot_matches	prot_matches_sig	prot_sequences	prot_sequences_sig	pep_query	pep_rank	pep_isbold	pep_isunique	pep_exp_mz	pep_exp_mr	pep_exp_z	pep_calc_mr	pep_delta	pep_miss	pep_score	pep_expect	pep_res_before	pep_seq	pep_res_after	pep_var_mod	pep_var_mod_pos	pep_summed_mod_pos	pep_scan_title
5	2::Q50341	sp|Q50341|MPN_142 Mgp-operon protein 3 Tax_Id=272634 [Mycoplasma pneumoniae (strain ATCC 29342 / M129)]	338	130378	6	2	6	2	69	1	1	1	621.826	1241.64	2	1241.66	-0.0245	0	54.16	3	F	TTPLNGGLDVVR	A	Deamidated (NQ)	0.000010000000.0		File: 20130626MPN2D_52.wiff, Sample: 20130626MPN2D_52 (sample number 1), Elution: 28.226 min, Period: 1, Cycle(s): 6054 (Experiment 2)
5	2::Q50341	sp|Q50341|MPN_142 Mgp-operon protein 3 Tax_Id=272634 [Mycoplasma pneumoniae (strain ATCC 29342 / M129)]	338	130378	6	2	6	2	143	1	1	1	838.888	1675.76	2	1675.77	-0.0102	0	52.45	5.4	K	TTAENDAPLVGMVGSGAA	G	Oxidation (M)	0.000000000002000000.0		File: 20130626MPN2D_52.wiff, Sample: 20130626MPN2D_52 (sample number 1), Elution: 27.876 min, Period: 1, Cycle(s): 6042 (Experiment 3)
5	2::Q50341	sp|Q50341|MPN_142 Mgp-operon protein 3 Tax_Id=272634 [Mycoplasma pneumoniae (strain ATCC 29342 / M129)]	338	130378	6	2	6	2	151	1	1	1	889.431	1776.85	2	1776.86	-0.0102	0	51.46	7.5	K	LNESWPVYEPLDSTK	E				File: 20130626MPN2D_52.wiff, Sample: 20130626MPN2D_52 (sample number 1), Elution: 29.044 min, Period: 1, Cycle(s): 6082 (Experiment 4)
5	2::Q50341	sp|Q50341|MPN_142 Mgp-operon protein 3 Tax_Id=272634 [Mycoplasma pneumoniae (strain ATCC 29342 / M129)]	338	130378	6	2	6	2	153	1	1	1	910.906	1819.8	2	1819.83	-0.0283	0	22.81	4900	K	TTAENDAPLVGMVGSGAAGS	A	Oxidation (M)	0.00000000000200000000.0		File: 20130626MPN2D_52.wiff, Sample: 20130626MPN2D_52 (sample number 1), Elution: 27.707 min, Period: 1, Cycle(s): 6037 (Experiment 3)
5	2::Q50341	sp|Q50341|MPN_142 Mgp-operon protein 3 Tax_Id=272634 [Mycoplasma pneumoniae (strain ATCC 29342 / M129)]	338	130378	6	2	6	2	169	1	1	1	1198.63	2395.26	2	2395.27	-0.0195	0	93.49	0.00058	K	TLQDLLVEQPVTPYTPNAGLAR	V				File: 20130626MPN2D_52.wiff, Sample: 20130626MPN2D_52 (sample number 1), Elution: 29.377 min, Period: 1, Cycle(s): 6092 (Experiment 3)
5	2::Q50341	sp|Q50341|MPN_142 Mgp-operon protein 3 Tax_Id=272634 [Mycoplasma pneumoniae (strain ATCC 29342 / M129)]	338	130378	6	2	6	2	171	1	1	1	1435.16	2868.3	2	2868.29	0.005	0	79.46	0.016	K	ALNGSQSGSSDTSGSNSQDFASYVLIFK	A	2 Deamidated (NQ)	0.0000010000000000010000000000.0		File: 20130626MPN2D_52.wiff, Sample: 20130626MPN2D_52 (sample number 1), Elution: 30.064 min, Period: 1, Cycle(s): 6157 (Experiment 2)

## Sheet: Biotin
Found in gel mass range 75-100 kDa
Peak list data path	Biotin_4.mgf
Peak list format	Mascot generic
Search type	MIS
Mascot version	2.2.07
Database	LudwigNR
Fasta file	LudwigNR_Q211_generic_forward.fasta
Total sequences	12931687
Total residues	4483500103
Sequences after taxonomy filter	12931687
Number of queries	553
Variable modifications	--------------------------------------------------------
Identifier	Name	Delta	Neutral loss(es)
1	Biotin (K)	226.078
2	Biotin (N-term)	226.078
3	Deamidated (N)	0.984009
4	Oxidation (M)	15.9949	63.9983	0
5	Propionamide (C)	71.0371
Search Parameters	--------------------------------------------------------
Taxonomy filter	All entries
Enzyme	semiTrypsin
Maximum Missed Cleavages	3
Fixed modifications
Quantitation method	None
Variable modifications	Biotin (K),Biotin (N-term),Deamidated (N),Oxidation (M),Propionamide (C)
Peptide Mass Tolerance	100
Peptide Mass Tolerance Units	ppm
Fragment Mass Tolerance	0.2
Fragment Mass Tolerance Units	Da
Mass values	Monoisotopic
Instrument type	ESI-QUAD-TOF
Isotope error mode	0
Format parameters	--------------------------------------------------------
Significance threshold	0.05
Max. number of hits	0
Use MudPIT protein scoring	0
Ions score cut-off	0
Include same-set proteins	0
Include sub-set proteins	0
Include unassigned	0
Require bold red	1
Use homology threshold	0
Group protein families	0
Protein hits	--------------------------------------------------------
prot_hit_num	prot_acc	prot_desc	prot_score	prot_mass	prot_matches	prot_matches_sig	prot_sequences	prot_sequences_sig	pep_query	pep_rank	pep_isbold	pep_isunique	pep_exp_mz	pep_exp_mr	pep_exp_z	pep_calc_mr	pep_delta	pep_miss	pep_score	pep_expect	pep_res_before	pep_seq	pep_res_after	pep_var_mod	pep_var_mod_pos	pep_summed_mod_pos	pep_scan_title
8	E1QBR0	tr|E1QBR0|MgpC protein Tax_Id=722438 [Mycoplasma pneumoniae]	427	124466	8	2	7	2	206	1	1	1	642.826	1283.64	2	1283.64	-0.0021	0	56.82	4.7	K	LQDSSFVDVFK	K				sample=1 period=1 cycle=7002 experiment=2
8	E1QBR0	tr|E1QBR0|MgpC protein Tax_Id=722438 [Mycoplasma pneumoniae]	427	124466	8	2	7	2	211	1	1	1	645.84	1289.67	2	1289.67	-0.0066	0	105.74	5.4e-05	R	VDFAANSVLQAR	N				sample=1 period=1 cycle=6455 experiment=2
8	E1QBR0	tr|E1QBR0|MgpC protein Tax_Id=722438 [Mycoplasma pneumoniae]	427	124466	8	2	7	2	213	5	1	1	646.36	1290.71	2	1290.66	0.0493	0	24.45	5700	R	VDFAANSVLQAR	N	Deamidated (N)	0.000003000000.0		sample=1 period=1 cycle=6424 experiment=2
8	E1QBR0	tr|E1QBR0|MgpC protein Tax_Id=722438 [Mycoplasma pneumoniae]	427	124466	8	2	7	2	254	1	1	1	677.376	1352.74	2	1352.72	0.0193	0	77.29	0.035	K	VDTLTTAVGSVYK	K				sample=1 period=1 cycle=6444 experiment=3
8	E1QBR0	tr|E1QBR0|MgpC protein Tax_Id=722438 [Mycoplasma pneumoniae]	427	124466	8	2	7	2	286	1	1	1	706.912	1411.81	2	1411.78	0.0269	0	29.56	1800	K	IAGIPLNIDFPSR	I				sample=1 period=1 cycle=7258 experiment=4
8	E1QBR0	tr|E1QBR0|MgpC protein Tax_Id=722438 [Mycoplasma pneumoniae]	427	124466	8	2	7	2	404	1	1	1	825.371	1648.73	2	1648.73	0.0026	0	57.58	4.3	K	IEYLDGNFYGEDSK	I				sample=1 period=1 cycle=6505 experiment=2
8	E1QBR0	tr|E1QBR0|MgpC protein Tax_Id=722438 [Mycoplasma pneumoniae]	427	124466	8	2	7	2	443	1	1	1	910.977	1819.94	2	1819.96	-0.0175	0	55.12	8.9	R	TDQLLVYGIVNESELK	S				sample=1 period=1 cycle=7255 experiment=2
8	E1QBR0	tr|E1QBR0|MgpC protein Tax_Id=722438 [Mycoplasma pneumoniae]	427	124466	8	2	7	2	467	1	1	1	990.515	1979.01	2	1978.99	0.026	0	70.47	0.29	K	TVDEVINNPDILQSFFK	F	Deamidated (N)	0.00000003000000000.0		sample=1 period=1 cycle=7303 experiment=2
Found in gel mass range 37-50 kDa
Peak list data path	Biotin_6.mgf
Peak list format	Mascot generic
Search type	MIS
Mascot version	2.2.07
Database	LudwigNR
Fasta file	LudwigNR_Q211_generic_forward.fasta
Total sequences	12931687
Total residues	4483500103
Sequences after taxonomy filter	12931687
Number of queries	672
Variable modifications	--------------------------------------------------------
Identifier	Name	Delta	Neutral loss(es)
1	Biotin (K)	226.078
2	Biotin (N-term)	226.078
3	Deamidated (N)	0.984009
4	Oxidation (M)	15.9949	63.9983	0
5	Propionamide (C)	71.0371
Search Parameters	--------------------------------------------------------
Taxonomy filter	All entries
Enzyme	semiTrypsin
Maximum Missed Cleavages	3
Fixed modifications
Quantitation method	None
Variable modifications	Biotin (K),Biotin (N-term),Deamidated (N),Oxidation (M),Propionamide (C)
Peptide Mass Tolerance	100
Peptide Mass Tolerance Units	ppm
Fragment Mass Tolerance	0.2
Fragment Mass Tolerance Units	Da
Mass values	Monoisotopic
Instrument type	ESI-QUAD-TOF
Isotope error mode	0
Format parameters	--------------------------------------------------------
Significance threshold	0.05
Max. number of hits	0
Use MudPIT protein scoring	0
Ions score cut-off	0
Include same-set proteins	0
Include sub-set proteins	0
Include unassigned	0
Require bold red	1
Use homology threshold	0
Group protein families	0
Protein hits	--------------------------------------------------------
prot_hit_num	prot_acc	prot_desc	prot_score	prot_mass	prot_matches	prot_matches_sig	prot_sequences	prot_sequences_sig	pep_query	pep_rank	pep_isbold	pep_isunique	pep_exp_mz	pep_exp_mr	pep_exp_z	pep_calc_mr	pep_delta	pep_miss	pep_score	pep_expect	pep_res_before	pep_seq	pep_res_after	pep_var_mod	pep_var_mod_pos	pep_summed_mod_pos	pep_scan_title
43	E1QBR0	tr|E1QBR0|MgpC protein Tax_Id=722438 [Mycoplasma pneumoniae]	89	124466	3	0	3	0	256	1	1	1	621.853	1241.69	2	1241.66	0.0291	0	32.78	930	F	TTPLNGGLDVVR	A	Deamidated (N)	0.000030000000.0		sample=1 period=1 cycle=6265 experiment=2
43	E1QBR0	tr|E1QBR0|MgpC protein Tax_Id=722438 [Mycoplasma pneumoniae]	89	124466	3	0	3	0	389	1	1	1	706.897	1411.78	2	1411.78	-0.0033	0	27.25	3800	K	IAGIPLNIDFPSR	I				sample=1 period=1 cycle=7247 experiment=2
43	E1QBR0	tr|E1QBR0|MgpC protein Tax_Id=722438 [Mycoplasma pneumoniae]	89	124466	3	0	3	0	560	1	1	1	889.463	1776.91	2	1776.86	0.0553	0	39.51	320	K	LNESWPVYEPLDSTK	N				sample=1 period=1 cycle=6934 experiment=2
Found in gel mass range 15-20 kDa
Peak list data path	Biotin_9.mgf
Peak list format	Mascot generic
Search type	MIS
Mascot version	2.2.07
Database	LudwigNR
Fasta file	LudwigNR_Q311_generic_forward.fasta
Total sequences	16981479
Total residues	5747323621
Sequences after taxonomy filter	16981479
Number of queries	1554
Variable modifications	--------------------------------------------------------
Identifier	Name	Delta	Neutral loss(es)
1	Biotin (K)	226.078
2	Biotin (N-term)	226.078
3	Deamidated (N)	0.984009
4	Oxidation (M)	15.9949	63.9983	0
5	Propionamide (C)	71.0371
Search Parameters	--------------------------------------------------------
Taxonomy filter	All entries
Enzyme	semiTrypsin
Maximum Missed Cleavages	3
Fixed modifications
Quantitation method	None
Variable modifications	Biotin (K),Biotin (N-term),Deamidated (N),Oxidation (M),Propionamide (C)
Peptide Mass Tolerance	100
Peptide Mass Tolerance Units	ppm
Fragment Mass Tolerance	0.2
Fragment Mass Tolerance Units	Da
Mass values	Monoisotopic
Instrument type	ESI-QUAD-TOF
Isotope error mode	0
Format parameters	--------------------------------------------------------
Significance threshold	0.05
Max. number of hits	0
Use MudPIT protein scoring	0
Ions score cut-off	0
Include same-set proteins	0
Include sub-set proteins	0
Include unassigned	0
Require bold red	1
Use homology threshold	0
Group protein families	0
Protein hits	--------------------------------------------------------
prot_hit_num	prot_acc	prot_desc	prot_score	prot_mass	prot_matches	prot_matches_sig	prot_sequences	prot_sequences_sig	pep_query	pep_rank	pep_isbold	pep_isunique	pep_exp_mz	pep_exp_mr	pep_exp_z	pep_calc_mr	pep_delta	pep_miss	pep_score	pep_expect	pep_res_before	pep_seq	pep_res_after	pep_var_mod	pep_var_mod_pos	pep_summed_mod_pos	pep_scan_title
95	E1QBR0	tr|E1QBR0|MgpC protein Tax_Id=722438 [Mycoplasma pneumoniae]	128	124466	4	0	4	0	785	1	1	1	677.363	1352.71	2	1352.72	-0.0065	0	48.23	40	K	VDTLTTAVGSVYK	K				sample=1 period=1 cycle=4767 experiment=4
95	E1QBR0	tr|E1QBR0|MgpC protein Tax_Id=722438 [Mycoplasma pneumoniae]	128	124466	4	0	4	0	1229	1	1	1	889.432	1776.85	2	1776.86	-0.0082	0	30.18	3600	K	LNESWPVYEPLDSTK	N				sample=1 period=1 cycle=4957 experiment=4
95	E1QBR0	tr|E1QBR0|MgpC protein Tax_Id=722438 [Mycoplasma pneumoniae]	128	124466	4	0	4	0	1249	1	1	1	910.979	1819.94	2	1819.96	-0.0131	0	42.38	210	R	TDQLLVYGIVNESELK	S				sample=1 period=1 cycle=5108 experiment=4
95	E1QBR0	tr|E1QBR0|MgpC protein Tax_Id=722438 [Mycoplasma pneumoniae]	128	124466	4	0	4	0	1297	1	1	1	640.396	1918.17	3	1918.12	0.05	0	20.69	10000	K	APVKPAAPTAPRPPVQPPK	K				sample=1 period=1 cycle=4541 experiment=3
Found in gel mass range 10-15 kDa
Peak list data path	Biotin_10.mgf
Peak list format	Mascot generic
Search type	MIS
Mascot version	2.2.07
Database	LudwigNR
Fasta file	LudwigNR_Q311_generic_forward.fasta
Total sequences	16981479
Total residues	5747323621
Sequences after taxonomy filter	16981479
Number of queries	624
Variable modifications	--------------------------------------------------------
Identifier	Name	Delta	Neutral loss(es)
1	Biotin (K)	226.078
2	Biotin (N-term)	226.078
3	Deamidated (N)	0.984009
4	Oxidation (M)	15.9949	63.9983	0
5	Propionamide (C)	71.0371
Search Parameters	--------------------------------------------------------
Taxonomy filter	All entries
Enzyme	semiTrypsin
Maximum Missed Cleavages	3
Fixed modifications
Quantitation method	None
Variable modifications	Biotin (K),Biotin (N-term),Deamidated (N),Oxidation (M),Propionamide (C)
Peptide Mass Tolerance	100
Peptide Mass Tolerance Units	ppm
Fragment Mass Tolerance	0.2
Fragment Mass Tolerance Units	Da
Mass values	Monoisotopic
Instrument type	ESI-QUAD-TOF
Isotope error mode	0
Format parameters	--------------------------------------------------------
Significance threshold	0.05
Max. number of hits	0
Use MudPIT protein scoring	0
Ions score cut-off	0
Include same-set proteins	0
Include sub-set proteins	0
Include unassigned	0
Require bold red	1
Use homology threshold	0
Group protein families	0
Protein hits	--------------------------------------------------------
prot_hit_num	prot_acc	prot_desc	prot_score	prot_mass	prot_matches	prot_matches_sig	prot_sequences	prot_sequences_sig	pep_query	pep_rank	pep_isbold	pep_isunique	pep_exp_mz	pep_exp_mr	pep_exp_z	pep_calc_mr	pep_delta	pep_miss	pep_score	pep_expect	pep_res_before	pep_seq	pep_res_after	pep_var_mod	pep_var_mod_pos	pep_summed_mod_pos	pep_scan_title
72	E1QBR0	tr|E1QBR0|MgpC protein Tax_Id=722438 [Mycoplasma pneumoniae]	76	124466	2	0	2	0	377	1	1	1	677.363	1352.71	2	1352.72	-0.0065	0	63.45	1.2	K	VDTLTTAVGSVYK	K				sample=1 period=1 cycle=5424 experiment=4
72	E1QBR0	tr|E1QBR0|MgpC protein Tax_Id=722438 [Mycoplasma pneumoniae]	76	124466	2	0	2	0	573	1	1	1	640.396	1918.17	3	1918.12	0.05	0	18.69	16000	K	APVKPAAPTAPRPPVQPPK	K				sample=1 period=1 cycle=4877 experiment=2
Found in gel mass range 80 kDa and 5.1 pI
Peak list data path	C:\Analyst Data\Projects\Mycoplasma\Michael\Pneumoniae\20120909\2Dspots_17aA.mgf
Peak list format	Mascot generic
Search type	MIS
Mascot version	2.3.02.05
Database	LudwigNR
Fasta file	LudwigNR_Q312m_generic_forward.fasta
Total sequences	19375804
Total residues	6797271065
Sequences after taxonomy filter	19375804
Number of queries	97
Variable modifications	--------------------------------------------------------
Identifier	Name	Delta	Neutral loss(es)
1	Biotin (K)	226.078
2	Biotin (N-term)	226.078
3	Deamidated (NQ)	0.984016
4	Oxidation (M)	15.9949	0	63.9983
5	Propionamide (C)	71.0371
Search Parameters	--------------------------------------------------------
Taxonomy filter	All entries
Enzyme	semiTrypsin
Maximum Missed Cleavages	3
Fixed modifications
Variable modifications	Biotin (K),Biotin (N-term),Deamidated (NQ),Oxidation (M),Propionamide (C)
Peptide Mass Tolerance	100
Peptide Mass Tolerance Units	ppm
Fragment Mass Tolerance	0.2
Fragment Mass Tolerance Units	Da
Mass values	Monoisotopic
Instrument type	ESI-QUAD-TOF
Format parameters	--------------------------------------------------------
Significance threshold	0.05
Max. number of hits	0
Use MudPIT protein scoring	0
Ions score cut-off	0
Include same-set proteins	0
Include sub-set proteins	0
Include unassigned	0
Require bold red	1
Use homology threshold	0
Group protein families	0
Protein hits	--------------------------------------------------------
prot_hit_num	prot_acc	prot_desc	prot_score	prot_mass	prot_matches	prot_matches_sig	prot_sequences	prot_sequences_sig	pep_query	pep_rank	pep_isbold	pep_isunique	pep_exp_mz	pep_exp_mr	pep_exp_z	pep_calc_mr	pep_delta	pep_miss	pep_score	pep_expect	pep_res_before	pep_seq	pep_res_after	pep_var_mod	pep_var_mod_pos	pep_summed_mod_pos	pep_scan_title
1	E1QBR0	tr|E1QBR0|MgpC protein Tax_Id=722438 [Mycoplasma pneumoniae]	842	124466	13	8	11	6	27	1	1	1	605.326	1208.64	2	1208.62	0.018	0	58.74	4	K	QFVENQLGFK	D				Locus:1.1.1.6315.2 File:~2Dspots_17a.wiff~
1	E1QBR0	tr|E1QBR0|MgpC protein Tax_Id=722438 [Mycoplasma pneumoniae]	842	124466	13	8	11	6	34	1	1	1	642.84	1283.67	2	1283.64	0.0254	0	78.32	0.061	K	LQDSSFVDVFK	K				Locus:1.1.1.6332.3 File:~2Dspots_17a.wiff~
1	E1QBR0	tr|E1QBR0|MgpC protein Tax_Id=722438 [Mycoplasma pneumoniae]	842	124466	13	8	11	6	36	1	1	1	645.852	1289.69	2	1289.67	0.0163	0	103.92	0.00014	R	VDFAANSVLQAR	N				Locus:1.1.1.6314.2 File:~2Dspots_17a.wiff~
1	E1QBR0	tr|E1QBR0|MgpC protein Tax_Id=722438 [Mycoplasma pneumoniae]	842	124466	13	8	11	6	44	1	1	1	677.374	1352.73	2	1352.72	0.014	0	66.01	0.89	K	VDTLTTAVGSVYK	K				Locus:1.1.1.6313.3 File:~2Dspots_17a.wiff~
1	E1QBR0	tr|E1QBR0|MgpC protein Tax_Id=722438 [Mycoplasma pneumoniae]	842	124466	13	8	11	6	50	1	1	1	706.906	1411.8	2	1411.78	0.0157	0	95.29	0.00098	K	IAGIPLNIDFPSR	I				Locus:1.1.1.6351.2 File:~2Dspots_17a.wiff~
1	E1QBR0	tr|E1QBR0|MgpC protein Tax_Id=722438 [Mycoplasma pneumoniae]	842	124466	13	8	11	6	51	1	1	1	706.908	1411.8	2	1411.78	0.0184	0	95.18	0.00097	K	IAGIPLNIDFPSR	I				Locus:1.1.1.6342.2 File:~2Dspots_17a.wiff~
1	E1QBR0	tr|E1QBR0|MgpC protein Tax_Id=722438 [Mycoplasma pneumoniae]	842	124466	13	8	11	6	59	3	1	1	774.89	1547.77	2	1547.74	0.0244	0	40.39	450	K	WTNTASHYLPVPY	Y				Locus:1.1.1.6331.3 File:~2Dspots_17a.wiff~
1	E1QBR0	tr|E1QBR0|MgpC protein Tax_Id=722438 [Mycoplasma pneumoniae]	842	124466	13	8	11	6	63	1	1	1	825.377	1648.74	2	1648.73	0.0147	0	81.33	0.037	K	IEYLDGNFYGEDSK	I				Locus:1.1.1.6315.4 File:~2Dspots_17a.wiff~
1	E1QBR0	tr|E1QBR0|MgpC protein Tax_Id=722438 [Mycoplasma pneumoniae]	842	124466	13	8	11	6	71	1	1	1	910.993	1819.97	2	1819.96	0.015	0	111.73	3.6e-05	R	TDQLLVYGIVNESELK	S				Locus:1.1.1.6340.2 File:~2Dspots_17a.wiff~
1	E1QBR0	tr|E1QBR0|MgpC protein Tax_Id=722438 [Mycoplasma pneumoniae]	842	124466	13	8	11	6	74	1	1	1	943.978	1885.94	2	1885.93	0.0098	0	72.46	0.37	F	SYTPFGSAESAVDLTTLK	D				Locus:1.1.1.6332.4 File:~2Dspots_17a.wiff~
1	E1QBR0	tr|E1QBR0|MgpC protein Tax_Id=722438 [Mycoplasma pneumoniae]	842	124466	13	8	11	6	78	1	1	1	990.015	1978.02	2	1978	0.011	0	85.57	0.018	K	TVDEVINNPDILQSFFK	F				Locus:1.1.1.6682.2 File:~2Dspots_17a.wiff~
1	E1QBR0	tr|E1QBR0|MgpC protein Tax_Id=722438 [Mycoplasma pneumoniae]	842	124466	13	8	11	6	79	1	1	1	990.017	1978.02	2	1978	0.0147	0	85.69	0.018	K	TVDEVINNPDILQSFFK	F				Locus:1.1.1.6711.2 File:~2Dspots_17a.wiff~
1	E1QBR0	tr|E1QBR0|MgpC protein Tax_Id=722438 [Mycoplasma pneumoniae]	842	124466	13	8	11	6	96	1	1	1	1331.16	2660.3	2	2660.29	0.0183	0	89.47	0.011	K	NSEPISFSYTPFGSAESAVDLTTLK	D				Locus:1.1.1.6359.3 File:~2Dspots_17a.wiff~
Found in gel mass range 50 kDa and pI 4.8
Peptide also matches to Q50341
Peak list data path	C:\Analyst Data\Projects\Mycoplasma\Michael\Pneumoniae\20120909\2D Bound Spots_77.mgf
Peak list format	Mascot generic
Search type	MIS
Mascot version	2.3.02.05
Database	LudwigNR
Fasta file	LudwigNR_Q312m_generic_forward.fasta
Total sequences	19375804
Total residues	6797271065
Sequences after taxonomy filter	19375804
Number of queries	157
Variable modifications	--------------------------------------------------------
Identifier	Name	Delta	Neutral loss(es)
1	Biotin (K)	226.078
2	Biotin (N-term)	226.078
3	Deamidated (NQ)	0.984016
4	Oxidation (M)	15.9949	0	63.9983
5	Propionamide (C)	71.0371
Search Parameters	--------------------------------------------------------
Taxonomy filter	All entries
Enzyme	semiTrypsin
Maximum Missed Cleavages	3
Fixed modifications
Variable modifications	Biotin (K),Biotin (N-term),Deamidated (NQ),Oxidation (M),Propionamide (C)
Peptide Mass Tolerance	100
Peptide Mass Tolerance Units	ppm
Fragment Mass Tolerance	0.2
Fragment Mass Tolerance Units	Da
Mass values	Monoisotopic
Instrument type	ESI-QUAD-TOF
Format parameters	--------------------------------------------------------
Significance threshold	0.05
Max. number of hits	0
Use MudPIT protein scoring	0
Ions score cut-off	0
Include same-set proteins	0
Include sub-set proteins	0
Include unassigned	0
Require bold red	1
Use homology threshold	0
Group protein families	0
Protein hits	--------------------------------------------------------
prot_hit_num	prot_acc	prot_desc	prot_score	prot_mass	prot_matches	prot_matches_sig	prot_sequences	prot_sequences_sig	pep_query	pep_rank	pep_isbold	pep_isunique	pep_exp_mz	pep_exp_mr	pep_exp_z	pep_calc_mr	pep_delta	pep_miss	pep_score	pep_expect	pep_res_before	pep_seq	pep_res_after	pep_var_mod	pep_var_mod_pos	pep_summed_mod_pos	pep_scan_title
14	H0PPS8	tr|H0PPS8|Cytadherence-related protein ORF6 homolog Tax_Id=1112856 [Mycoplasma pneumoniae 309]	96	16249	1	1	1	1	126	1	1	1	911.003	1819.99	2	1819.96	0.0354	0	97.83	0.00082	R	TDQLLVYGIVNESELK	S				Locus:1.1.1.5593.4 File:~2D Bound Spots_77.wiff~
Also Scores 94 against Q50341
Found in gel mass range 40 kDa and pI 6.5
Peak list data path	C:\Analyst Data\Projects\Mycoplasma\Michael\Pneumoniae\20120909\2Dspots_133.mgf
Peak list format	Mascot generic
Search type	MIS
Mascot version	2.3.02.05
Database	LudwigNR
Fasta file	LudwigNR_Q312m_generic_forward.fasta
Total sequences	19375804
Total residues	6797271065
Sequences after taxonomy filter	19375804
Number of queries	265
Variable modifications	--------------------------------------------------------
Identifier	Name	Delta	Neutral loss(es)
1	Biotin (K)	226.078
2	Biotin (N-term)	226.078
3	Deamidated (NQ)	0.984016
4	Oxidation (M)	15.9949	0	63.9983
5	Propionamide (C)	71.0371
Search Parameters	--------------------------------------------------------
Taxonomy filter	All entries
Enzyme	semiTrypsin
Maximum Missed Cleavages	3
Fixed modifications
Variable modifications	Biotin (K),Biotin (N-term),Deamidated (NQ),Oxidation (M),Propionamide (C)
Peptide Mass Tolerance	100
Peptide Mass Tolerance Units	ppm
Fragment Mass Tolerance	0.2
Fragment Mass Tolerance Units	Da
Mass values	Monoisotopic
Instrument type	ESI-QUAD-TOF
Format parameters	--------------------------------------------------------
Significance threshold	0.05
Max. number of hits	0
Use MudPIT protein scoring	0
Ions score cut-off	0
Include same-set proteins	0
Include sub-set proteins	0
Include unassigned	0
Require bold red	1
Use homology threshold	0
Group protein families	0
Protein hits	--------------------------------------------------------
prot_hit_num	prot_acc	prot_desc	prot_score	prot_mass	prot_matches	prot_matches_sig	prot_sequences	prot_sequences_sig	pep_query	pep_rank	pep_isbold	pep_isunique	pep_exp_mz	pep_exp_mr	pep_exp_z	pep_calc_mr	pep_delta	pep_miss	pep_score	pep_expect	pep_res_before	pep_seq	pep_res_after	pep_var_mod	pep_var_mod_pos	pep_summed_mod_pos	pep_scan_title
3	Q50341	sp|Q50341|Mgp-operon protein 3 Tax_Id=272634 [Mycoplasma pneumoniae]	536	130378	14	2	8	2	2	1	1	1	402.247	802.479	2	802.495	-0.0168	0	28.79	1600	K	LALPYVK	Q				Locus:1.1.1.5821.4 File:~2Dspots_133.wiff~
3	Q50341	sp|Q50341|Mgp-operon protein 3 Tax_Id=272634 [Mycoplasma pneumoniae]	536	130378	14	2	8	2	57	5	1	1	520.778	1039.54	2	1039.57	-0.0245	0	62.37	1.9	T	PLNGGLDVVR	A	Deamidated (NQ)	0.0030000000.0		Locus:1.1.1.5795.3 File:~2Dspots_133.wiff~
3	Q50341	sp|Q50341|Mgp-operon protein 3 Tax_Id=272634 [Mycoplasma pneumoniae]	536	130378	14	2	8	2	100	1	1	1	621.337	1240.66	2	1240.68	-0.0178	0	43.25	180	F	TTPLNGGLDVVR	A				Locus:1.1.1.5802.3 File:~2Dspots_133.wiff~
3	Q50341	sp|Q50341|Mgp-operon protein 3 Tax_Id=272634 [Mycoplasma pneumoniae]	536	130378	14	2	8	2	101	1	1	1	621.832	1241.65	2	1241.66	-0.0116	0	93.51	0.0018	F	TTPLNGGLDVVR	A	Deamidated (NQ)	0.000030000000.0		Locus:1.1.1.5808.4 File:~2Dspots_133.wiff~
3	Q50341	sp|Q50341|Mgp-operon protein 3 Tax_Id=272634 [Mycoplasma pneumoniae]	536	130378	14	2	8	2	103	1	1	1	621.836	1241.66	2	1241.66	-0.0043	0	77.67	0.066	F	TTPLNGGLDVVR	A	Deamidated (NQ)	0.000030000000.0		Locus:1.1.1.5793.4 File:~2Dspots_133.wiff~
3	Q50341	sp|Q50341|Mgp-operon protein 3 Tax_Id=272634 [Mycoplasma pneumoniae]	536	130378	14	2	8	2	104	1	1	1	621.836	1241.66	2	1241.66	-0.0043	0	62.24	2.3	F	TTPLNGGLDVVR	A	Deamidated (NQ)	0.000030000000.0		Locus:1.1.1.5796.2 File:~2Dspots_133.wiff~
3	Q50341	sp|Q50341|Mgp-operon protein 3 Tax_Id=272634 [Mycoplasma pneumoniae]	536	130378	14	2	8	2	105	1	1	1	621.836	1241.66	2	1241.66	-0.0043	0	53	19	F	TTPLNGGLDVVR	A	Deamidated (NQ)	0.000030000000.0		Locus:1.1.1.5797.2 File:~2Dspots_133.wiff~
3	Q50341	sp|Q50341|Mgp-operon protein 3 Tax_Id=272634 [Mycoplasma pneumoniae]	536	130378	14	2	8	2	169	1	1	1	794.414	1586.81	2	1586.83	-0.0166	0	75.69	0.14	Y	TPFTTPLNGGLDVVR	A	Deamidated (NQ)	0.000000030000000.0		Locus:1.1.1.5837.3 File:~2Dspots_133.wiff~
3	Q50341	sp|Q50341|Mgp-operon protein 3 Tax_Id=272634 [Mycoplasma pneumoniae]	536	130378	14	2	8	2	205	1	1	1	889.431	1776.85	2	1776.86	-0.0097	0	54.12	23	K	LNESWPVYEPLDSTK	E				Locus:1.1.1.5820.2 File:~2Dspots_133.wiff~
3	Q50341	sp|Q50341|Mgp-operon protein 3 Tax_Id=272634 [Mycoplasma pneumoniae]	536	130378	14	2	8	2	206	1	1	1	889.431	1776.85	2	1776.86	-0.0094	0	43.71	250	K	LNESWPVYEPLDSTK	E				Locus:1.1.1.5826.4 File:~2Dspots_133.wiff~
3	Q50341	sp|Q50341|Mgp-operon protein 3 Tax_Id=272634 [Mycoplasma pneumoniae]	536	130378	14	2	8	2	222	1	1	1	964.498	1926.98	2	1926.99	-0.0119	0	54.73	22	K	TLQDLLVEQPVTPYTPN	A				Locus:1.1.1.5815.4 File:~2Dspots_133.wiff~
3	Q50341	sp|Q50341|Mgp-operon protein 3 Tax_Id=272634 [Mycoplasma pneumoniae]	536	130378	14	2	8	2	255	1	1	1	799.424	2395.25	3	2395.27	-0.0251	0	50.03	81	K	TLQDLLVEQPVTPYTPNAGLAR	V				Locus:1.1.1.5846.2 File:~2Dspots_133.wiff~
3	Q50341	sp|Q50341|Mgp-operon protein 3 Tax_Id=272634 [Mycoplasma pneumoniae]	536	130378	14	2	8	2	256	1	1	1	799.425	2395.25	3	2395.27	-0.0212	0	29.31	9500	K	TLQDLLVEQPVTPYTPNAGLAR	V				Locus:1.1.1.5853.3 File:~2Dspots_133.wiff~
3	Q50341	sp|Q50341|Mgp-operon protein 3 Tax_Id=272634 [Mycoplasma pneumoniae]	536	130378	14	2	8	2	263	1	1	1	831.038	2490.09	3	2490.12	-0.0229	0	146.86	1.8e-08	R	VNGVAQDTVHFGSGQESSWNSQR	S	Deamidated (NQ)	0.03000000000000000000000.0		Locus:1.1.1.5801.3 File:~2Dspots_133.wiff~
Found in gel mass range 40 kDa and pI 9.6-9.8
Peak list data path	C:\Analyst Data\Projects\Mycoplasma\Michael\Pneumoniae\20120920\2Dspots_156.mgf
Peak list format	Mascot generic
Search type	MIS
Mascot version	2.3.02.05
Database	LudwigNR
Fasta file	LudwigNR_Q312m_generic_forward.fasta
Total sequences	19375804
Total residues	6797271065
Sequences after taxonomy filter	19375804
Number of queries	200
Variable modifications	--------------------------------------------------------
Identifier	Name	Delta	Neutral loss(es)
1	Biotin (K)	226.078
2	Biotin (N-term)	226.078
3	Deamidated (NQ)	0.984016
4	Oxidation (M)	15.9949	0	63.9983
5	Propionamide (C)	71.0371
Search Parameters	--------------------------------------------------------
Taxonomy filter	All entries
Enzyme	semiTrypsin
Maximum Missed Cleavages	3
Fixed modifications
Variable modifications	Biotin (K),Biotin (N-term),Deamidated (NQ),Oxidation (M),Propionamide (C)
Peptide Mass Tolerance	100
Peptide Mass Tolerance Units	ppm
Fragment Mass Tolerance	0.2
Fragment Mass Tolerance Units	Da
Mass values	Monoisotopic
Instrument type	ESI-QUAD-TOF
Format parameters	--------------------------------------------------------
Significance threshold	0.05
Max. number of hits	0
Use MudPIT protein scoring	0
Ions score cut-off	0
Include same-set proteins	0
Include sub-set proteins	0
Include unassigned	0
Require bold red	1
Use homology threshold	0
Group protein families	0
Protein hits	--------------------------------------------------------
prot_hit_num	prot_acc	prot_desc	prot_score	prot_mass	prot_matches	prot_matches_sig	prot_sequences	prot_sequences_sig	pep_query	pep_rank	pep_isbold	pep_isunique	pep_exp_mz	pep_exp_mr	pep_exp_z	pep_calc_mr	pep_delta	pep_miss	pep_score	pep_expect	pep_res_before	pep_seq	pep_res_after	pep_var_mod	pep_var_mod_pos	pep_summed_mod_pos	pep_scan_title
1	Q50341	sp|Q50341|Mgp-operon protein 3 Tax_Id=272634 [Mycoplasma pneumoniae]	1565	130378	37	9	19	7	44	2	1	1	621.856	1241.7	2	1241.66	0.0349	0	54.44	11	F	TTPLNGGLDVVR	A	Deamidated (NQ)	0.000030000000.0		Locus:1.1.1.5415.2 File:~2Dspots_156.wiff~
1	Q50341	sp|Q50341|Mgp-operon protein 3 Tax_Id=272634 [Mycoplasma pneumoniae]	1565	130378	37	9	19	7	45	2	1	1	621.856	1241.7	2	1241.66	0.0358	0	53.81	13	F	TTPLNGGLDVVR	A	Deamidated (NQ)	0.000030000000.0		Locus:1.1.1.5405.2 File:~2Dspots_156.wiff~
1	Q50341	sp|Q50341|Mgp-operon protein 3 Tax_Id=272634 [Mycoplasma pneumoniae]	1565	130378	37	9	19	7	46	2	1	1	621.856	1241.7	2	1241.66	0.0367	0	45.69	84	F	TTPLNGGLDVVR	A	Deamidated (NQ)	0.000030000000.0		Locus:1.1.1.5509.2 File:~2Dspots_156.wiff~
1	Q50341	sp|Q50341|Mgp-operon protein 3 Tax_Id=272634 [Mycoplasma pneumoniae]	1565	130378	37	9	19	7	47	1	1	1	621.857	1241.7	2	1241.66	0.0383	0	75.26	0.092	F	TTPLNGGLDVVR	A	Deamidated (NQ)	0.000030000000.0		Locus:1.1.1.5497.3 File:~2Dspots_156.wiff~
1	Q50341	sp|Q50341|Mgp-operon protein 3 Tax_Id=272634 [Mycoplasma pneumoniae]	1565	130378	37	9	19	7	65	1	1	1	709.395	1416.77	2	1416.73	0.0458	0	63.18	1.8	N	SQDFASYVLIFK	A				Locus:1.1.1.5571.4 File:~2Dspots_156.wiff~
1	Q50341	sp|Q50341|Mgp-operon protein 3 Tax_Id=272634 [Mycoplasma pneumoniae]	1565	130378	37	9	19	7	79	1	1	1	794.443	1586.87	2	1586.83	0.0409	0	84.43	0.015	Y	TPFTTPLNGGLDVVR	A	Deamidated (NQ)	0.000000030000000.0		Locus:1.1.1.5540.3 File:~2Dspots_156.wiff~
1	Q50341	sp|Q50341|Mgp-operon protein 3 Tax_Id=272634 [Mycoplasma pneumoniae]	1565	130378	37	9	19	7	80	1	1	1	794.446	1586.88	2	1586.83	0.0462	0	77.63	0.072	Y	TPFTTPLNGGLDVVR	A	Deamidated (NQ)	0.000000030000000.0		Locus:1.1.1.5547.4 File:~2Dspots_156.wiff~
1	Q50341	sp|Q50341|Mgp-operon protein 3 Tax_Id=272634 [Mycoplasma pneumoniae]	1565	130378	37	9	19	7	81	1	1	1	794.446	1586.88	2	1586.83	0.0473	0	99.49	0.00046	Y	TPFTTPLNGGLDVVR	A	Deamidated (NQ)	0.000000030000000.0		Locus:1.1.1.5552.2 File:~2Dspots_156.wiff~
1	Q50341	sp|Q50341|Mgp-operon protein 3 Tax_Id=272634 [Mycoplasma pneumoniae]	1565	130378	37	9	19	7	85	1	1	1	808.453	1614.89	2	1614.85	0.0408	0	66.95	0.86	K	TLQDLLVEQPVTPY	T				Locus:1.1.1.5557.2 File:~2Dspots_156.wiff~
1	Q50341	sp|Q50341|Mgp-operon protein 3 Tax_Id=272634 [Mycoplasma pneumoniae]	1565	130378	37	9	19	7	90	1	1	1	830.919	1659.82	2	1659.78	0.0468	0	68.75	0.73	K	TTAENDAPLVGMVGSGAA	G				Locus:1.1.1.5530.3 File:~2Dspots_156.wiff~
1	Q50341	sp|Q50341|Mgp-operon protein 3 Tax_Id=272634 [Mycoplasma pneumoniae]	1565	130378	37	9	19	7	92	1	1	1	833.448	1664.88	2	1664.83	0.0495	0	61.28	3.6	R	AAHLHPSYELVDWK	R				Locus:1.1.1.5535.2 File:~2Dspots_156.wiff~
1	Q50341	sp|Q50341|Mgp-operon protein 3 Tax_Id=272634 [Mycoplasma pneumoniae]	1565	130378	37	9	19	7	93	1	1	1	833.451	1664.89	2	1664.83	0.0556	0	77.9	0.078	R	AAHLHPSYELVDWK	R				Locus:1.1.1.5532.2 File:~2Dspots_156.wiff~
1	Q50341	sp|Q50341|Mgp-operon protein 3 Tax_Id=272634 [Mycoplasma pneumoniae]	1565	130378	37	9	19	7	94	1	1	1	838.919	1675.82	2	1675.77	0.0512	0	37.96	870	K	TTAENDAPLVGMVGSGAA	G	Oxidation (M)	0.000000000004000000.0		Locus:1.1.1.5214.2 File:~2Dspots_156.wiff~
1	Q50341	sp|Q50341|Mgp-operon protein 3 Tax_Id=272634 [Mycoplasma pneumoniae]	1565	130378	37	9	19	7	101	1	1	1	889.459	1776.9	2	1776.86	0.0472	0	57.49	10	K	LNESWPVYEPLDSTK	E				Locus:1.1.1.5542.4 File:~2Dspots_156.wiff~
1	Q50341	sp|Q50341|Mgp-operon protein 3 Tax_Id=272634 [Mycoplasma pneumoniae]	1565	130378	37	9	19	7	102	1	1	1	889.459	1776.9	2	1776.86	0.0472	0	52.56	32	K	LNESWPVYEPLDSTK	E				Locus:1.1.1.5537.3 File:~2Dspots_156.wiff~
1	Q50341	sp|Q50341|Mgp-operon protein 3 Tax_Id=272634 [Mycoplasma pneumoniae]	1565	130378	37	9	19	7	111	1	1	1	910.944	1819.87	2	1819.83	0.0482	0	114.38	2.2e-05	K	TTAENDAPLVGMVGSGAAGS	A	Oxidation (M)	0.00000000000400000000.0		Locus:1.1.1.5165.2 File:~2Dspots_156.wiff~
1	Q50341	sp|Q50341|Mgp-operon protein 3 Tax_Id=272634 [Mycoplasma pneumoniae]	1565	130378	37	9	19	7	116	3	1	1	946.465	1890.91	2	1890.86	0.0515	0	28.6	8800	K	TTAENDAPLVGMVGSGAAGSA	S	Oxidation (M)	0.000000000004000000000.0		Locus:1.1.1.5187.3 File:~2Dspots_156.wiff~
1	Q50341	sp|Q50341|Mgp-operon protein 3 Tax_Id=272634 [Mycoplasma pneumoniae]	1565	130378	37	9	19	7	117	1	1	1	953.51	1905.01	2	1904.95	0.0533	1	74.6	0.21	R	KLNESWPVYEPLDSTK	E				Locus:1.1.1.5534.2 File:~2Dspots_156.wiff~
1	Q50341	sp|Q50341|Mgp-operon protein 3 Tax_Id=272634 [Mycoplasma pneumoniae]	1565	130378	37	9	19	7	120	1	1	1	964.53	1927.05	2	1926.99	0.0515	0	75.79	0.15	K	TLQDLLVEQPVTPYTPN	A				Locus:1.1.1.5547.2 File:~2Dspots_156.wiff~
1	Q50341	sp|Q50341|Mgp-operon protein 3 Tax_Id=272634 [Mycoplasma pneumoniae]	1565	130378	37	9	19	7	121	1	1	1	964.53	1927.05	2	1926.99	0.0515	0	57.21	11	K	TLQDLLVEQPVTPYTPN	A				Locus:1.1.1.5552.3 File:~2Dspots_156.wiff~
1	Q50341	sp|Q50341|Mgp-operon protein 3 Tax_Id=272634 [Mycoplasma pneumoniae]	1565	130378	37	9	19	7	122	1	1	1	965.024	1928.03	2	1927.98	0.0554	0	46.8	120	K	TLQDLLVEQPVTPYTPN	A	Deamidated (NQ)	0.00300000000000000.0		Locus:1.1.1.5554.3 File:~2Dspots_156.wiff~
1	Q50341	sp|Q50341|Mgp-operon protein 3 Tax_Id=272634 [Mycoplasma pneumoniae]	1565	130378	37	9	19	7	128	1	1	1	989.984	1977.95	2	1977.89	0.0575	0	112.07	4.2e-05	K	TTAENDAPLVGMVGSGAAGSAS	S	Oxidation (M)	0.0000000000040000000000.0		Locus:1.1.1.5164.2 File:~2Dspots_156.wiff~
1	Q50341	sp|Q50341|Mgp-operon protein 3 Tax_Id=272634 [Mycoplasma pneumoniae]	1565	130378	37	9	19	7	146	1	1	1	1134.5	2266.98	2	2266.91	0.0743	0	61.78	5	K	ALNGSQSGSSDTSGSNSQDFASY	V	Deamidated (NQ)	0.00300000000000000000000.0		Locus:1.1.1.5159.4 File:~2Dspots_156.wiff~
1	Q50341	sp|Q50341|Mgp-operon protein 3 Tax_Id=272634 [Mycoplasma pneumoniae]	1565	130378	37	9	19	7	155	1	1	1	1154.08	2306.14	2	2306.07	0.0699	0	66.16	2	K	TTAENDAPLVGMVGSGAAGSASSLQ	G	Oxidation (M)	0.0000000000040000000000000.0		Locus:1.1.1.5368.3 File:~2Dspots_156.wiff~
1	Q50341	sp|Q50341|Mgp-operon protein 3 Tax_Id=272634 [Mycoplasma pneumoniae]	1565	130378	37	9	19	7	164	1	1	1	1198.67	2395.33	2	2395.27	0.0594	0	79.83	0.066	K	TLQDLLVEQPVTPYTPNAGLAR	V				Locus:1.1.1.5548.3 File:~2Dspots_156.wiff~
1	Q50341	sp|Q50341|Mgp-operon protein 3 Tax_Id=272634 [Mycoplasma pneumoniae]	1565	130378	37	9	19	7	165	1	1	1	1198.67	2395.33	2	2395.27	0.0594	0	46.33	150	K	TLQDLLVEQPVTPYTPNAGLAR	V				Locus:1.1.1.5553.2 File:~2Dspots_156.wiff~
1	Q50341	sp|Q50341|Mgp-operon protein 3 Tax_Id=272634 [Mycoplasma pneumoniae]	1565	130378	37	9	19	7	166	1	1	1	1199.17	2396.33	2	2396.26	0.0667	0	66.2	1.6	K	TLQDLLVEQPVTPYTPNAGLAR	V	Deamidated (NQ)	0.0000000030000000000000.0		Locus:1.1.1.5554.2 File:~2Dspots_156.wiff~
1	Q50341	sp|Q50341|Mgp-operon protein 3 Tax_Id=272634 [Mycoplasma pneumoniae]	1565	130378	37	9	19	7	174	1	1	1	1246.1	2490.18	2	2490.12	0.0648	0	26.67	19000	R	VNGVAQDTVHFGSGQESSWNSQR	S	Deamidated (NQ)	0.03000000000000000000000.0		Locus:1.1.1.5406.4 File:~2Dspots_156.wiff~
1	Q50341	sp|Q50341|Mgp-operon protein 3 Tax_Id=272634 [Mycoplasma pneumoniae]	1565	130378	37	9	19	7	175	1	1	1	1246.1	2490.19	2	2490.12	0.0734	0	157.99	1.4e-09	R	VNGVAQDTVHFGSGQESSWNSQR	S	Deamidated (NQ)	0.03000000000000000000000.0		Locus:1.1.1.5367.2 File:~2Dspots_156.wiff~
1	Q50341	sp|Q50341|Mgp-operon protein 3 Tax_Id=272634 [Mycoplasma pneumoniae]	1565	130378	37	9	19	7	176	1	1	1	1434.7	2867.39	2	2867.31	0.0784	0	128.44	1.5e-06	K	ALNGSQSGSSDTSGSNSQDFASYVLIFK	A	Deamidated (NQ)	0.0000030000000000000000000000.0		Locus:1.1.1.5567.2 File:~2Dspots_156.wiff~
1	Q50341	sp|Q50341|Mgp-operon protein 3 Tax_Id=272634 [Mycoplasma pneumoniae]	1565	130378	37	9	19	7	177	1	1	1	1434.7	2867.39	2	2867.31	0.0784	0	82.03	0.065	K	ALNGSQSGSSDTSGSNSQDFASYVLIFK	A	Deamidated (NQ)	0.0000030000000000000000000000.0		Locus:1.1.1.5564.2 File:~2Dspots_156.wiff~
1	Q50341	sp|Q50341|Mgp-operon protein 3 Tax_Id=272634 [Mycoplasma pneumoniae]	1565	130378	37	9	19	7	178	1	1	1	974.453	2920.34	3	2920.26	0.0776	0	146.1	2.6e-08	K	FQDTTSSDQSNTNQNALSFDTQESQK	A				Locus:1.1.1.5167.2 File:~2Dspots_156.wiff~
1	Q50341	sp|Q50341|Mgp-operon protein 3 Tax_Id=272634 [Mycoplasma pneumoniae]	1565	130378	37	9	19	7	179	1	1	1	974.784	2921.33	3	2921.24	0.0883	0	26.59	23000	K	FQDTTSSDQSNTNQNALSFDTQESQK	A	Deamidated (NQ)	0.00000000000000300000000000.0		Locus:1.1.1.5187.2 File:~2Dspots_156.wiff~
1	Q50341	sp|Q50341|Mgp-operon protein 3 Tax_Id=272634 [Mycoplasma pneumoniae]	1565	130378	37	9	19	7	181	1	1	1	1087.92	3260.73	3	3260.64	0.093	0	63.5	4.9	A	NTYLLQDHNTLTPYTPFTTPLNGGLDVVR	A	Deamidated (NQ)	0.00000000000000000000030000000.0		Locus:1.1.1.5565.3 File:~2Dspots_156.wiff~
1	Q50341	sp|Q50341|Mgp-operon protein 3 Tax_Id=272634 [Mycoplasma pneumoniae]	1565	130378	37	9	19	7	182	1	1	1	1087.92	3260.73	3	3260.64	0.0932	0	92.47	0.0062	A	NTYLLQDHNTLTPYTPFTTPLNGGLDVVR	A	Deamidated (NQ)	0.00000000000000000000030000000.0		Locus:1.1.1.5571.2 File:~2Dspots_156.wiff~
1	Q50341	sp|Q50341|Mgp-operon protein 3 Tax_Id=272634 [Mycoplasma pneumoniae]	1565	130378	37	9	19	7	183	1	1	1	1087.92	3260.73	3	3260.64	0.0933	0	86.3	0.026	A	NTYLLQDHNTLTPYTPFTTPLNGGLDVVR	A	Deamidated (NQ)	0.00000000000000000000030000000.0		Locus:1.1.1.5563.2 File:~2Dspots_156.wiff~
1	Q50341	sp|Q50341|Mgp-operon protein 3 Tax_Id=272634 [Mycoplasma pneumoniae]	1565	130378	37	9	19	7	184	1	1	1	1087.92	3260.73	3	3260.64	0.0934	0	78.13	0.17	A	NTYLLQDHNTLTPYTPFTTPLNGGLDVVR	A	Deamidated (NQ)	0.00000000000000000000030000000.0		Locus:1.1.1.5569.2 File:~2Dspots_156.wiff~

## Sheet: Shaves
Shave 1
Peak list data path	MPNIEF_2R.mgf
Peak list format	Mascot generic
Search type	MIS
Mascot version	2.2.07
Database	LudwigNR
Fasta file	LudwigNR_Q311_generic_forward.fasta
Total sequences	16981479
Total residues	5747323621
Sequences after taxonomy filter	16981479
Number of queries	2639
Variable modifications	--------------------------------------------------------
Identifier	Name	Delta	Neutral loss(es)
1	Deamidated (N)	0.984009
2	Oxidation (M)	15.9949	63.9983	0
3	Propionamide (C)	71.0371
Search Parameters	--------------------------------------------------------
Taxonomy filter	All entries
Enzyme	semiTrypsin
Maximum Missed Cleavages	3
Fixed modifications
Quantitation method	None
Variable modifications	Deamidated (N),Oxidation (M),Propionamide (C)
Peptide Mass Tolerance	100
Peptide Mass Tolerance Units	ppm
Fragment Mass Tolerance	0.2
Fragment Mass Tolerance Units	Da
Mass values	Monoisotopic
Instrument type	ESI-QUAD-TOF
Isotope error mode	0
Format parameters	--------------------------------------------------------
Significance threshold	0.05
Max. number of hits	0
Use MudPIT protein scoring	0
Ions score cut-off	0
Include same-set proteins	0
Include sub-set proteins	0
Include unassigned	0
Require bold red	1
Use homology threshold	0
Group protein families	0
Protein hits	--------------------------------------------------------
prot_hit_num	prot_acc	prot_desc	prot_score	prot_mass	prot_matches	prot_matches_sig	prot_sequences	prot_sequences_sig	pep_query	pep_rank	pep_isbold	pep_isunique	pep_exp_mz	pep_exp_mr	pep_exp_z	pep_calc_mr	pep_delta	pep_miss	pep_score	pep_expect	pep_res_before	pep_seq	pep_res_after	pep_var_mod	pep_var_mod_pos	pep_summed_mod_pos	pep_scan_title
4	E1QBR0	tr|E1QBR0|MgpC protein Tax_Id=722438 [Mycoplasma pneumoniae]	74	124466	5	0	4	0	131	1	1	1	545.308	544.301	1	544.286	0.0149	0	11.18	81000	K	ALVEN	T				sample=1 period=1 cycle=8237 experiment=2
4	E1QBR0	tr|E1QBR0|MgpC protein Tax_Id=722438 [Mycoplasma pneumoniae]	74	124466	5	0	4	0	2308	1	1	1	850.456	1698.9	2	1698.89	0.0039	0	38.91	140	K	ALVENTAGLNGPINGLF	T				sample=1 period=1 cycle=6318 experiment=2
4	E1QBR0	tr|E1QBR0|MgpC protein Tax_Id=722438 [Mycoplasma pneumoniae]	74	124466	5	0	4	0	2309	1	1	1	850.976	1699.94	2	1699.88	0.0584	0	19.1	12000	K	ALVENTAGLNGPINGLF	T	Deamidated (N)	0.00000000010000000.0		sample=1 period=1 cycle=6322 experiment=3
4	E1QBR0	tr|E1QBR0|MgpC protein Tax_Id=722438 [Mycoplasma pneumoniae]	74	124466	5	0	4	0	2310	10	1	1	852.446	1702.88	2	1702.84	0.0355	0	15.97	28000	K	TVDEVINNPDILQSF	F				sample=1 period=1 cycle=6264 experiment=2
4	E1QBR0	tr|E1QBR0|MgpC protein Tax_Id=722438 [Mycoplasma pneumoniae]	74	124466	5	0	4	0	2416	10	0	1	964.444	1926.87	2	1926.99	-0.1201	0	13.79	47000	K	TLQDLLVEQPVTPYTPN	A				sample=1 period=1 cycle=6085 experiment=4
Peak list data path	MPNIEF_3.mgf
Peak list format	Mascot generic
Search type	MIS
Mascot version	2.2.07
Database	LudwigNR
Fasta file	LudwigNR_Q311_generic_forward.fasta
Total sequences	16981479
Total residues	5747323621
Sequences after taxonomy filter	16981479
Number of queries	2543
Variable modifications	--------------------------------------------------------
Identifier	Name	Delta	Neutral loss(es)
1	Deamidated (N)	0.984009
2	Oxidation (M)	15.9949	63.9983	0
3	Propionamide (C)	71.0371
Search Parameters	--------------------------------------------------------
Taxonomy filter	All entries
Enzyme	semiTrypsin
Maximum Missed Cleavages	3
Fixed modifications
Quantitation method	None
Variable modifications	Deamidated (N),Oxidation (M),Propionamide (C)
Peptide Mass Tolerance	100
Peptide Mass Tolerance Units	ppm
Fragment Mass Tolerance	0.2
Fragment Mass Tolerance Units	Da
Mass values	Monoisotopic
Instrument type	ESI-QUAD-TOF
Isotope error mode	0
Format parameters	--------------------------------------------------------
Significance threshold	0.05
Max. number of hits	0
Use MudPIT protein scoring	0
Ions score cut-off	0
Include same-set proteins	0
Include sub-set proteins	0
Include unassigned	0
Require bold red	1
Use homology threshold	0
Group protein families	0
Protein hits	--------------------------------------------------------
prot_hit_num	prot_acc	prot_desc	prot_score	prot_mass	prot_matches	prot_matches_sig	prot_sequences	prot_sequences_sig	pep_query	pep_rank	pep_isbold	pep_isunique	pep_exp_mz	pep_exp_mr	pep_exp_z	pep_calc_mr	pep_delta	pep_miss	pep_score	pep_expect	pep_res_before	pep_seq	pep_res_after	pep_var_mod	pep_var_mod_pos	pep_summed_mod_pos	pep_scan_title
2	E1QBR0	tr|E1QBR0|MgpC protein Tax_Id=722438 [Mycoplasma pneumoniae]	354	124466	8	1	7	1	2256	1	1	1	850.467	1698.92	2	1698.89	0.026	0	38.35	150	K	ALVENTAGLNGPINGLF	T				sample=1 period=1 cycle=7152 experiment=2
2	E1QBR0	tr|E1QBR0|MgpC protein Tax_Id=722438 [Mycoplasma pneumoniae]	354	124466	8	1	7	1	2258	2	1	1	850.953	1699.89	2	1699.88	0.0142	0	14.87	36000	K	ALVENTAGLNGPINGLF	T	Deamidated (N)	0.00000000010000000.0		sample=1 period=1 cycle=7168 experiment=2
2	E1QBR0	tr|E1QBR0|MgpC protein Tax_Id=722438 [Mycoplasma pneumoniae]	354	124466	8	1	7	1	2323	1	1	1	943.98	1885.95	2	1885.93	0.0154	0	50.78	10	F	SYTPFGSAESAVDLTTLK	D				sample=1 period=1 cycle=7009 experiment=2
2	E1QBR0	tr|E1QBR0|MgpC protein Tax_Id=722438 [Mycoplasma pneumoniae]	354	124466	8	1	7	1	2356	2	1	1	990.079	1978.14	2	1978	0.139	0	34.29	320	K	TVDEVINNPDILQSFFK	F				sample=1 period=1 cycle=8613 experiment=2
2	E1QBR0	tr|E1QBR0|MgpC protein Tax_Id=722438 [Mycoplasma pneumoniae]	354	124466	8	1	7	1	2440	1	1	1	828.769	2483.29	3	2483.25	0.032	0	70.98	0.11	K	ISTLESQATDGFANSLLNFGTGLK	A				sample=1 period=1 cycle=8674 experiment=2
2	E1QBR0	tr|E1QBR0|MgpC protein Tax_Id=722438 [Mycoplasma pneumoniae]	354	124466	8	1	7	1	2460	1	1	1	898.163	2691.47	3	2691.35	0.1185	0	78.87	0.017	Q	NGIASSQDDLTGILPLSDEFSAVITK	D	Deamidated (N)	0.10000000000000000000000000.0		sample=1 period=1 cycle=8708 experiment=3
2	E1QBR0	tr|E1QBR0|MgpC protein Tax_Id=722438 [Mycoplasma pneumoniae]	354	124466	8	1	7	1	2361	1	1	1	997.542	2989.6	3	2989.51	0.0912	0	40.97	210	L	AVQNGIASSQDDLTGILPLSDEFSAVITK	D	Deamidated (N)	0.00010000000000000000000000000.0		sample=1 period=1 cycle=8695 experiment=2
2	E1QBR0	tr|E1QBR0|MgpC protein Tax_Id=722438 [Mycoplasma pneumoniae]	354	124466	8	1	7	1	2514	1	1	1	1035.25	3102.74	3	3102.6	0.1391	0	52.12	7.8	A	LAVQNGIASSQDDLTGILPLSDEFSAVITK	D	Deamidated (N)	0.000010000000000000000000000000.0		sample=1 period=1 cycle=8716 experiment=4
Peak list data path	MPNIEF_4.mgf
Peak list format	Mascot generic
Search type	MIS
Mascot version	2.2.07
Database	LudwigNR
Fasta file	LudwigNR_Q311_generic_forward.fasta
Total sequences	16981479
Total residues	5747323621
Sequences after taxonomy filter	16981479
Number of queries	5742
Variable modifications	--------------------------------------------------------
Identifier	Name	Delta	Neutral loss(es)
1	Deamidated (N)	0.984009
2	Oxidation (M)	15.9949	63.9983	0
3	Propionamide (C)	71.0371
Search Parameters	--------------------------------------------------------
Taxonomy filter	All entries
Enzyme	semiTrypsin
Maximum Missed Cleavages	3
Fixed modifications
Quantitation method	None
Variable modifications	Deamidated (N),Oxidation (M),Propionamide (C)
Peptide Mass Tolerance	100
Peptide Mass Tolerance Units	ppm
Fragment Mass Tolerance	0.2
Fragment Mass Tolerance Units	Da
Mass values	Monoisotopic
Instrument type	ESI-QUAD-TOF
Isotope error mode	0
Format parameters	--------------------------------------------------------
Significance threshold	0.05
Max. number of hits	0
Use MudPIT protein scoring	0
Ions score cut-off	0
Include same-set proteins	0
Include sub-set proteins	0
Include unassigned	0
Require bold red	1
Use homology threshold	0
Group protein families	0
Protein hits	--------------------------------------------------------
prot_hit_num	prot_acc	prot_desc	prot_score	prot_mass	prot_matches	prot_matches_sig	prot_sequences	prot_sequences_sig	pep_query	pep_rank	pep_isbold	pep_isunique	pep_exp_mz	pep_exp_mr	pep_exp_z	pep_calc_mr	pep_delta	pep_miss	pep_score	pep_expect	pep_res_before	pep_seq	pep_res_after	pep_var_mod	pep_var_mod_pos	pep_summed_mod_pos	pep_scan_title
3	E1QBR0	tr|E1QBR0|MgpC protein Tax_Id=722438 [Mycoplasma pneumoniae]	606	124466	25	1	15	1	2811	4	1	1	642.826	1283.64	2	1283.64	-0.0016	0	19.54	9900	K	LQDSSFVDVFK	K				sample=1 period=1 cycle=4349 experiment=4
3	E1QBR0	tr|E1QBR0|MgpC protein Tax_Id=722438 [Mycoplasma pneumoniae]	606	124466	25	1	15	1	2843	1	1	1	646.356	1290.7	2	1290.67	0.0301	0	30.54	810	F	GSAESAVDLTTLK	D				sample=1 period=1 cycle=3827 experiment=2
3	E1QBR0	tr|E1QBR0|MgpC protein Tax_Id=722438 [Mycoplasma pneumoniae]	606	124466	25	1	15	1	4268	1	1	1	825.414	1648.81	2	1648.73	0.0884	0	41.49	79	K	IEYLDGNFYGEDSK	I				sample=1 period=1 cycle=4103 experiment=2
3	E1QBR0	tr|E1QBR0|MgpC protein Tax_Id=722438 [Mycoplasma pneumoniae]	606	124466	25	1	15	1	4414	1	1	1	850.953	1699.89	2	1699.88	0.0142	0	33.31	510	K	ALVENTAGLNGPINGLF	T	Deamidated (N)	0.00000000000001000.0		sample=1 period=1 cycle=5181 experiment=2
3	E1QBR0	tr|E1QBR0|MgpC protein Tax_Id=722438 [Mycoplasma pneumoniae]	606	124466	25	1	15	1	4415	1	1	1	850.987	1699.96	2	1699.88	0.0805	0	29.31	1100	K	ALVENTAGLNGPINGLF	T	Deamidated (N)	0.00000000010000000.0		sample=1 period=1 cycle=5092 experiment=2
3	E1QBR0	tr|E1QBR0|MgpC protein Tax_Id=722438 [Mycoplasma pneumoniae]	606	124466	25	1	15	1	4416	6	1	1	851.44	1700.86	2	1700.86	0.0026	0	10.78	95000	K	ALVENTAGLNGPINGLF	T	2 Deamidated (N)	0.00001000010000000.0		sample=1 period=1 cycle=5095 experiment=2
3	E1QBR0	tr|E1QBR0|MgpC protein Tax_Id=722438 [Mycoplasma pneumoniae]	606	124466	25	1	15	1	4417	2	1	1	851.473	1700.93	2	1700.86	0.0689	0	12.86	52000	K	ALVENTAGLNGPINGLF	T	2 Deamidated (N)	0.00000000010001000.0		sample=1 period=1 cycle=4991 experiment=2
3	E1QBR0	tr|E1QBR0|MgpC protein Tax_Id=722438 [Mycoplasma pneumoniae]	606	124466	25	1	15	1	4523	1	1	1	889.432	1776.85	2	1776.86	-0.0068	0	26.58	2500	K	LNESWPVYEPLDSTK	N				sample=1 period=1 cycle=4339 experiment=2
3	E1QBR0	tr|E1QBR0|MgpC protein Tax_Id=722438 [Mycoplasma pneumoniae]	606	124466	25	1	15	1	4533	1	1	1	594.634	1780.88	3	1780.79	0.0859	0	35.04	360	W	FYTFDNGEKPTYDGK	Q				sample=1 period=1 cycle=3786 experiment=3
3	E1QBR0	tr|E1QBR0|MgpC protein Tax_Id=722438 [Mycoplasma pneumoniae]	606	124466	25	1	15	1	2334	1	1	1	594.948	1781.82	3	1781.78	0.0441	0	50.27	10	W	FYTFDNGEKPTYDGK	Q	Deamidated (N)	0.000001000000000.0		sample=1 period=1 cycle=3790 experiment=2
3	E1QBR0	tr|E1QBR0|MgpC protein Tax_Id=722438 [Mycoplasma pneumoniae]	606	124466	25	1	15	1	4653	1	1	1	943.957	1885.9	2	1885.93	-0.0312	0	25.08	3700	F	SYTPFGSAESAVDLTTLK	D				sample=1 period=1 cycle=4734 experiment=3
3	E1QBR0	tr|E1QBR0|MgpC protein Tax_Id=722438 [Mycoplasma pneumoniae]	606	124466	25	1	15	1	4654	1	1	1	943.992	1885.97	2	1885.93	0.0386	0	67.86	0.2	F	SYTPFGSAESAVDLTTLK	D				sample=1 period=1 cycle=4690 experiment=2
3	E1QBR0	tr|E1QBR0|MgpC protein Tax_Id=722438 [Mycoplasma pneumoniae]	606	124466	25	1	15	1	4772	3	1	1	990.032	1978.05	2	1978	0.0436	0	33.05	590	K	TVDEVINNPDILQSFFK	F				sample=1 period=1 cycle=5744 experiment=2
3	E1QBR0	tr|E1QBR0|MgpC protein Tax_Id=722438 [Mycoplasma pneumoniae]	606	124466	25	1	15	1	4835	1	1	1	1015.52	2029.02	2	2029.03	-0.0031	0	32.79	660	R	DNGLVPIYNEGIVDIWGR	V				sample=1 period=1 cycle=5357 experiment=2
3	E1QBR0	tr|E1QBR0|MgpC protein Tax_Id=722438 [Mycoplasma pneumoniae]	606	124466	25	1	15	1	5357	1	1	1	799.407	2395.2	3	2395.27	-0.0745	0	30.12	1400	K	TLQDLLVEQPVTPYTPNAGLAR	V				sample=1 period=1 cycle=4799 experiment=3
3	E1QBR0	tr|E1QBR0|MgpC protein Tax_Id=722438 [Mycoplasma pneumoniae]	606	124466	25	1	15	1	5416	1	1	1	828.759	2483.25	3	2483.25	-0.0007	0	49.92	14	K	ISTLESQATDGFANSLLNFGTGLK	A				sample=1 period=1 cycle=5795 experiment=2
3	E1QBR0	tr|E1QBR0|MgpC protein Tax_Id=722438 [Mycoplasma pneumoniae]	606	124466	25	1	15	1	5417	1	1	1	1242.66	2483.3	2	2483.25	0.0477	0	94.79	0.00046	K	ISTLESQATDGFANSLLNFGTGLK	A				sample=1 period=1 cycle=5659 experiment=2
3	E1QBR0	tr|E1QBR0|MgpC protein Tax_Id=722438 [Mycoplasma pneumoniae]	606	124466	25	1	15	1	5418	2	1	1	829.097	2484.27	3	2484.24	0.0295	0	22.71	7500	K	ISTLESQATDGFANSLLNFGTGLK	A	Deamidated (N)	0.000000000000010000000000.0		sample=1 period=1 cycle=5120 experiment=2
3	E1QBR0	tr|E1QBR0|MgpC protein Tax_Id=722438 [Mycoplasma pneumoniae]	606	124466	25	1	15	1	5419	1	1	1	829.129	2484.37	3	2484.24	0.1277	0	53.98	5	K	ISTLESQATDGFANSLLNFGTGLK	A	Deamidated (N)	0.000000000000000001000000.0		sample=1 period=1 cycle=5265 experiment=2
3	E1QBR0	tr|E1QBR0|MgpC protein Tax_Id=722438 [Mycoplasma pneumoniae]	606	124466	25	1	15	1	5420	1	1	1	829.14	2484.4	3	2484.24	0.1604	0	66.22	0.27	K	ISTLESQATDGFANSLLNFGTGLK	A	Deamidated (N)	0.000000000000010000000000.0		sample=1 period=1 cycle=5783 experiment=2
3	E1QBR0	tr|E1QBR0|MgpC protein Tax_Id=722438 [Mycoplasma pneumoniae]	606	124466	25	1	15	1	5497	1	1	1	898.14	2691.4	3	2691.35	0.0504	0	62.68	0.78	Q	NGIASSQDDLTGILPLSDEFSAVITK	D	Deamidated (N)	0.10000000000000000000000000.0		sample=1 period=1 cycle=6441 experiment=2
3	E1QBR0	tr|E1QBR0|MgpC protein Tax_Id=722438 [Mycoplasma pneumoniae]	606	124466	25	1	15	1	5580	1	1	1	997.183	2988.53	3	2988.53	-0.0013	0	39.72	160	L	AVQNGIASSQDDLTGILPLSDEFSAVITK	D				sample=1 period=1 cycle=6012 experiment=2
3	E1QBR0	tr|E1QBR0|MgpC protein Tax_Id=722438 [Mycoplasma pneumoniae]	606	124466	25	1	15	1	5581	1	1	1	997.542	2989.6	3	2989.51	0.0912	0	31.09	1100	L	AVQNGIASSQDDLTGILPLSDEFSAVITK	D	Deamidated (N)	0.00010000000000000000000000000.0		sample=1 period=1 cycle=6045 experiment=2
3	E1QBR0	tr|E1QBR0|MgpC protein Tax_Id=722438 [Mycoplasma pneumoniae]	606	124466	25	1	15	1	5621	1	1	1	1035.24	3102.7	3	3102.6	0.1026	0	49.47	16	A	LAVQNGIASSQDDLTGILPLSDEFSAVITK	D	Deamidated (N)	0.000010000000000000000000000000.0		sample=1 period=1 cycle=6296 experiment=3
3	E1QBR0	tr|E1QBR0|MgpC protein Tax_Id=722438 [Mycoplasma pneumoniae]	606	124466	25	1	15	1	5700	1	1	1	907.963	3627.82	4	3627.85	-0.0273	0	27.32	2900	L	SQAPAALAVQNGIASSQDDLTGILPLSDEFSAVITK	D	Deamidated (N)	0.000000000010000000000000000000000000.0		sample=1 period=1 cycle=6723 experiment=2
Peak list data path	MPNIEF_5.mgf
Peak list format	Mascot generic
Search type	MIS
Mascot version	2.2.07
Database	LudwigNR
Fasta file	LudwigNR_Q311_generic_forward.fasta
Total sequences	16981479
Total residues	5747323621
Sequences after taxonomy filter	16981479
Number of queries	3504
Variable modifications	--------------------------------------------------------
Identifier	Name	Delta	Neutral loss(es)
1	Deamidated (N)	0.984009
2	Oxidation (M)	15.9949	63.9983	0
3	Propionamide (C)	71.0371
Search Parameters	--------------------------------------------------------
Taxonomy filter	All entries
Enzyme	semiTrypsin
Maximum Missed Cleavages	3
Fixed modifications
Quantitation method	None
Variable modifications	Deamidated (N),Oxidation (M),Propionamide (C)
Peptide Mass Tolerance	100
Peptide Mass Tolerance Units	ppm
Fragment Mass Tolerance	0.2
Fragment Mass Tolerance Units	Da
Mass values	Monoisotopic
Instrument type	ESI-QUAD-TOF
Isotope error mode	0
Format parameters	--------------------------------------------------------
Significance threshold	0.05
Max. number of hits	0
Use MudPIT protein scoring	0
Ions score cut-off	0
Include same-set proteins	0
Include sub-set proteins	0
Include unassigned	0
Require bold red	1
Use homology threshold	0
Group protein families	0
Protein hits	--------------------------------------------------------
prot_hit_num	prot_acc	prot_desc	prot_score	prot_mass	prot_matches	prot_matches_sig	prot_sequences	prot_sequences_sig	pep_query	pep_rank	pep_isbold	pep_isunique	pep_exp_mz	pep_exp_mr	pep_exp_z	pep_calc_mr	pep_delta	pep_miss	pep_score	pep_expect	pep_res_before	pep_seq	pep_res_after	pep_var_mod	pep_var_mod_pos	pep_summed_mod_pos	pep_scan_title
28	Q50341	sp|Q50341|Mgp-operon protein 3 Tax_Id=2104 [Mycoplasma pneumoniae]	212	130378	4	1	4	1	1711	1	1	1	621.334	1240.65	2	1240.68	-0.0238	0	40.4	76	F	TTPLNGGLDVVR	A				sample=1 period=1 cycle=4165 experiment=4
28	Q50341	sp|Q50341|Mgp-operon protein 3 Tax_Id=2104 [Mycoplasma pneumoniae]	212	130378	4	1	4	1	1995	1	1	1	645.845	1289.68	2	1289.67	0.0034	0	95.07	0.0003	R	VDFAANSVLQAR	N				sample=1 period=1 cycle=4347 experiment=2
28	Q50341	sp|Q50341|Mgp-operon protein 3 Tax_Id=2104 [Mycoplasma pneumoniae]	212	130378	4	1	4	1	2332	1	1	1	694.812	1387.61	2	1387.62	-0.0065	0	37.79	130	Y	YYSANFPEAGNR	R				sample=1 period=1 cycle=3861 experiment=2
28	Q50341	sp|Q50341|Mgp-operon protein 3 Tax_Id=2104 [Mycoplasma pneumoniae]	212	130378	4	1	4	1	2850	1	1	1	879.969	1757.92	2	1757.89	0.0321	0	47.17	22	F	TLLDTFAYVTPVSGMK	G	Oxidation (M)	0.0000000000000020.0		sample=1 period=1 cycle=5523 experiment=3
Peak list data path	MPNIEF_6.mgf
Peak list format	Mascot generic
Search type	MIS
Mascot version	2.2.07
Database	LudwigNR
Fasta file	LudwigNR_Q311_generic_forward.fasta
Total sequences	16981479
Total residues	5747323621
Sequences after taxonomy filter	16981479
Number of queries	5528
Variable modifications	--------------------------------------------------------
Identifier	Name	Delta	Neutral loss(es)
1	Deamidated (N)	0.984009
2	Oxidation (M)	15.9949	63.9983	0
3	Propionamide (C)	71.0371
Search Parameters	--------------------------------------------------------
Taxonomy filter	All entries
Enzyme	semiTrypsin
Maximum Missed Cleavages	3
Fixed modifications
Quantitation method	None
Variable modifications	Deamidated (N),Oxidation (M),Propionamide (C)
Peptide Mass Tolerance	100
Peptide Mass Tolerance Units	ppm
Fragment Mass Tolerance	0.2
Fragment Mass Tolerance Units	Da
Mass values	Monoisotopic
Instrument type	ESI-QUAD-TOF
Isotope error mode	0
Format parameters	--------------------------------------------------------
Significance threshold	0.05
Max. number of hits	0
Use MudPIT protein scoring	0
Ions score cut-off	0
Include same-set proteins	0
Include sub-set proteins	0
Include unassigned	0
Require bold red	1
Use homology threshold	0
Group protein families	0
Protein hits	--------------------------------------------------------
prot_hit_num	prot_acc	prot_desc	prot_score	prot_mass	prot_matches	prot_matches_sig	prot_sequences	prot_sequences_sig	pep_query	pep_rank	pep_isbold	pep_isunique	pep_exp_mz	pep_exp_mr	pep_exp_z	pep_calc_mr	pep_delta	pep_miss	pep_score	pep_expect	pep_res_before	pep_seq	pep_res_after	pep_var_mod	pep_var_mod_pos	pep_summed_mod_pos	pep_scan_title
45	Q50341	sp|Q50341|Mgp-operon protein 3 Tax_Id=2104 [Mycoplasma pneumoniae]	101	130378	4	0	2	0	4547	1	1	1	555.965	1664.87	3	1664.83	0.0414	0	54.03	4.2	R	AAHLHPSYELVDWK	R				sample=1 period=1 cycle=3568 experiment=2
45	Q50341	sp|Q50341|Mgp-operon protein 3 Tax_Id=2104 [Mycoplasma pneumoniae]	101	130378	4	0	2	0	4928	1	1	1	728.102	2181.28	3	2181.16	0.1217	0	49.98	7.7	K	YLNTAQALHQMGVIVPGLEK	W				sample=1 period=1 cycle=4517 experiment=4
45	Q50341	sp|Q50341|Mgp-operon protein 3 Tax_Id=2104 [Mycoplasma pneumoniae]	101	130378	4	0	2	0	4931	3	1	1	728.408	2182.2	3	2182.15	0.0577	0	14.06	45000	K	YLNTAQALHQMGVIVPGLEK	W	Deamidated (N)	0.00100000000000000000.0		sample=1 period=1 cycle=4515 experiment=4
45	Q50341	sp|Q50341|Mgp-operon protein 3 Tax_Id=2104 [Mycoplasma pneumoniae]	101	130378	4	0	2	0	4937	1	1	1	733.395	2197.16	3	2197.16	0.0078	0	33.33	590	K	YLNTAQALHQMGVIVPGLEK	W	Oxidation (M)	0.00000000002000000000.0		sample=1 period=1 cycle=3826 experiment=2
Peak list data path	MPNIEF_10.mgf
Peak list format	Mascot generic
Search type	MIS
Mascot version	2.2.07
Database	LudwigNR
Fasta file	LudwigNR_Q311_generic_forward.fasta
Total sequences	16981479
Total residues	5747323621
Sequences after taxonomy filter	16981479
Number of queries	4951
Variable modifications	--------------------------------------------------------
Identifier	Name	Delta	Neutral loss(es)
1	Deamidated (N)	0.984009
2	Oxidation (M)	15.9949	63.9983	0
3	Propionamide (C)	71.0371
Search Parameters	--------------------------------------------------------
Taxonomy filter	All entries
Enzyme	semiTrypsin
Maximum Missed Cleavages	3
Fixed modifications
Quantitation method	None
Variable modifications	Deamidated (N),Oxidation (M),Propionamide (C)
Peptide Mass Tolerance	100
Peptide Mass Tolerance Units	ppm
Fragment Mass Tolerance	0.2
Fragment Mass Tolerance Units	Da
Mass values	Monoisotopic
Instrument type	ESI-QUAD-TOF
Isotope error mode	0
Format parameters	--------------------------------------------------------
Significance threshold	0.05
Max. number of hits	0
Use MudPIT protein scoring	0
Ions score cut-off	0
Include same-set proteins	0
Include sub-set proteins	0
Include unassigned	0
Require bold red	1
Use homology threshold	0
Group protein families	0
Protein hits	--------------------------------------------------------
prot_hit_num	prot_acc	prot_desc	prot_score	prot_mass	prot_matches	prot_matches_sig	prot_sequences	prot_sequences_sig	pep_query	pep_rank	pep_isbold	pep_isunique	pep_exp_mz	pep_exp_mr	pep_exp_z	pep_calc_mr	pep_delta	pep_miss	pep_score	pep_expect	pep_res_before	pep_seq	pep_res_after	pep_var_mod	pep_var_mod_pos	pep_summed_mod_pos	pep_scan_title
16	Q50341	sp|Q50341|Mgp-operon protein 3 Tax_Id=2104 [Mycoplasma pneumoniae]	129	130378	6	0	4	0	683	1	1	1	402.269	802.524	2	802.495	0.0287	0	33.75	99	K	LALPYVK	Q				sample=1 period=1 cycle=4486 experiment=3
16	Q50341	sp|Q50341|Mgp-operon protein 3 Tax_Id=2104 [Mycoplasma pneumoniae]	129	130378	6	0	4	0	1071	1	1	1	525.31	1048.61	2	1048.59	0.0138	0	36.83	130	N	SLLNFGTGLK	A				sample=1 period=1 cycle=4941 experiment=4
16	Q50341	sp|Q50341|Mgp-operon protein 3 Tax_Id=2104 [Mycoplasma pneumoniae]	129	130378	6	0	4	0	1072	1	1	1	525.31	1048.61	2	1048.59	0.0138	0	30.11	610	N	SLLNFGTGLK	A				sample=1 period=1 cycle=7029 experiment=3
16	Q50341	sp|Q50341|Mgp-operon protein 3 Tax_Id=2104 [Mycoplasma pneumoniae]	129	130378	6	0	4	0	1836	2	1	1	582.35	1162.68	2	1162.63	0.05	0	33.59	250	A	NSLLNFGTGLK	A				sample=1 period=1 cycle=7003 experiment=2
16	Q50341	sp|Q50341|Mgp-operon protein 3 Tax_Id=2104 [Mycoplasma pneumoniae]	129	130378	6	0	4	0	1849	1	1	1	582.843	1163.67	2	1163.62	0.0534	0	37.89	100	A	NSLLNFGTGLK	A	Deamidated (N)	0.00001000000.0		sample=1 period=1 cycle=7004 experiment=2
16	Q50341	sp|Q50341|Mgp-operon protein 3 Tax_Id=2104 [Mycoplasma pneumoniae]	129	130378	6	0	4	0	4345	2	1	1	704.362	1406.71	2	1406.66	0.0449	0	24.85	3200	S	ASSLQGNGSNSSGLK	S	Deamidated (N)	0.000000100000000.0		sample=1 period=1 cycle=4409 experiment=4
Shave 2
Peak list data path	C:\Analyst Data\Projects\Michael\Pneumoniae\20120416\86.wiff
Peak list format	Mascot generic
Search type	MIS
Mascot version	2.3.02.04
Database	LudwigNR
Fasta file	LudwigNR_Q212_generic_forward.fasta
Total sequences	18379370
Total residues	6435939691
Sequences after taxonomy filter	18379370
Number of queries	3087
Variable modifications	--------------------------------------------------------
Identifier	Name	Delta	Neutral loss(es)
1	Deamidated (NQ)	0.984016
2	Oxidation (M)	15.9949	0	63.9983
3	Propionamide (C)	71.0371
Search Parameters	--------------------------------------------------------
Taxonomy filter	All entries
Enzyme	semiTrypsin
Maximum Missed Cleavages	3
Fixed modifications
Variable modifications	Deamidated (NQ),Oxidation (M),Propionamide (C)
Peptide Mass Tolerance	100
Peptide Mass Tolerance Units	ppm
Fragment Mass Tolerance	0.2
Fragment Mass Tolerance Units	Da
Mass values	Monoisotopic
Instrument type	ESI-QUAD-TOF
Format parameters	--------------------------------------------------------
Significance threshold	0.05
Max. number of hits	0
Use MudPIT protein scoring	0
Ions score cut-off	0
Include same-set proteins	0
Include sub-set proteins	0
Include unassigned	0
Require bold red	1
Use homology threshold	0
Group protein families	0
Protein hits	--------------------------------------------------------
prot_hit_num	prot_acc	prot_desc	prot_score	prot_mass	prot_matches	prot_matches_sig	prot_sequences	prot_sequences_sig	pep_query	pep_rank	pep_isbold	pep_isunique	pep_exp_mz	pep_exp_mr	pep_exp_z	pep_calc_mr	pep_delta	pep_miss	pep_score	pep_expect	pep_res_before	pep_seq	pep_res_after	pep_var_mod	pep_var_mod_pos	pep_summed_mod_pos	pep_scan_title
14	Q50341	sp|Q50341|Mgp-operon protein 3 Tax_Id=272634 [Mycoplasma pneumoniae]	106	130378	3	0	3	0	474	1	1	1	448.235	894.456	2	894.435	0.0215	0	19.95	8500	R	AAHLHPSY	E				File: 86.wiff, Sample: 86 (sample number 1), Elution: 19.552 min, Period: 1, Cycle(s): 3743 (Experiment 2)
14	Q50341	sp|Q50341|Mgp-operon protein 3 Tax_Id=272634 [Mycoplasma pneumoniae]	106	130378	3	0	3	0	2383	4	1	1	754.427	1506.84	2	1506.82	0.0167	0	20.35	12000	Q	ALHQMGVIVPGLEK	W	Oxidation (M)	0.00002000000000.0		File: 86.wiff, Sample: 86 (sample number 1), Elution: 28.01 min, Period: 1, Cycle(s): 4118 (Experiment 4)
14	Q50341	sp|Q50341|Mgp-operon protein 3 Tax_Id=272634 [Mycoplasma pneumoniae]	106	130378	3	0	3	0	2785	1	1	1	925.983	1849.95	2	1849.91	0.0414	0	71.14	0.14	K	TVDEVINNPDILQSFF	K				File: 86.wiff, Sample: 86 (sample number 1), Elution: 41.871 min, Period: 1, Cycle(s): 4680 (Experiment 4)
Peak list data path	C:\Analyst Data\Projects\Michael\Pneumoniae\20120416\90.wiff
Peak list format	Mascot generic
Search type	MIS
Mascot version	2.3.02.04
Database	LudwigNR
Fasta file	LudwigNR_Q212_generic_forward.fasta
Total sequences	18379370
Total residues	6435939691
Sequences after taxonomy filter	18379370
Number of queries	2689
Variable modifications	--------------------------------------------------------
Identifier	Name	Delta	Neutral loss(es)
1	Deamidated (NQ)	0.984016
2	Oxidation (M)	15.9949	0	63.9983
3	Propionamide (C)	71.0371
Search Parameters	--------------------------------------------------------
Taxonomy filter	All entries
Enzyme	semiTrypsin
Maximum Missed Cleavages	3
Fixed modifications
Variable modifications	Deamidated (NQ),Oxidation (M),Propionamide (C)
Peptide Mass Tolerance	100
Peptide Mass Tolerance Units	ppm
Fragment Mass Tolerance	0.2
Fragment Mass Tolerance Units	Da
Mass values	Monoisotopic
Instrument type	ESI-QUAD-TOF
Format parameters	--------------------------------------------------------
Significance threshold	0.05
Max. number of hits	0
Use MudPIT protein scoring	0
Ions score cut-off	0
Include same-set proteins	0
Include sub-set proteins	0
Include unassigned	0
Require bold red	1
Use homology threshold	0
Group protein families	0
Protein hits	--------------------------------------------------------
prot_hit_num	prot_acc	prot_desc	prot_score	prot_mass	prot_matches	prot_matches_sig	prot_sequences	prot_sequences_sig	pep_query	pep_rank	pep_isbold	pep_isunique	pep_exp_mz	pep_exp_mr	pep_exp_z	pep_calc_mr	pep_delta	pep_miss	pep_score	pep_expect	pep_res_before	pep_seq	pep_res_after	pep_var_mod	pep_var_mod_pos	pep_summed_mod_pos	pep_scan_title
15	H0PPY0	tr|H0PPY0|Cytadherence-related protein ORF6 Tax_Id=1112856 [Mycoplasma pneumoniae 309]	461	124480	10	2	8	1	308	5	1	1	494.771	987.527	2	987.524	0.003	0	34.7	410	Y	GIVNESELK	S				File: 90.wiff, Sample: 90 (sample number 1), Elution: 22.534 min, Period: 1, Cycle(s): 4049 (Experiment 3)
15	H0PPY0	tr|H0PPY0|Cytadherence-related protein ORF6 Tax_Id=1112856 [Mycoplasma pneumoniae 309]	461	124480	10	2	8	1	1048	1	1	1	636.295	1270.58	2	1270.57	0.0084	0	50.51	9.8	W	STTAGLDSDGGYK	A				File: 90.wiff, Sample: 90 (sample number 1), Elution: 19.121 min, Period: 1, Cycle(s): 3926 (Experiment 2)
15	H0PPY0	tr|H0PPY0|Cytadherence-related protein ORF6 Tax_Id=1112856 [Mycoplasma pneumoniae 309]	461	124480	10	2	8	1	1099	1	1	1	646.322	1290.63	2	1290.67	-0.0369	0	27.69	2400	F	GSAESAVDLTTLK	D				File: 90.wiff, Sample: 90 (sample number 1), Elution: 27.298 min, Period: 1, Cycle(s): 4252 (Experiment 2)
15	H0PPY0	tr|H0PPY0|Cytadherence-related protein ORF6 Tax_Id=1112856 [Mycoplasma pneumoniae 309]	461	124480	10	2	8	1	1100	1	1	1	646.339	1290.66	2	1290.67	-0.0032	0	61.52	0.99	F	GSAESAVDLTTLK	D				File: 90.wiff, Sample: 90 (sample number 1), Elution: 25.232 min, Period: 1, Cycle(s): 4168 (Experiment 2)
15	H0PPY0	tr|H0PPY0|Cytadherence-related protein ORF6 Tax_Id=1112856 [Mycoplasma pneumoniae 309]	461	124480	10	2	8	1	1596	1	1	1	736.355	1470.69	2	1470.66	0.0322	0	66.79	0.31	Y	TFDNGEKPTYDGK	Q				File: 90.wiff, Sample: 90 (sample number 1), Elution: 19.74 min, Period: 1, Cycle(s): 3940 (Experiment 4)
15	H0PPY0	tr|H0PPY0|Cytadherence-related protein ORF6 Tax_Id=1112856 [Mycoplasma pneumoniae 309]	461	124480	10	2	8	1	1909	1	1	1	808.434	1614.85	2	1614.85	0.0025	0	36.44	360	K	TLQDLLVEQPVTPY	T				File: 90.wiff, Sample: 90 (sample number 1), Elution: 38.884 min, Period: 1, Cycle(s): 4693 (Experiment 4)
15	H0PPY0	tr|H0PPY0|Cytadherence-related protein ORF6 Tax_Id=1112856 [Mycoplasma pneumoniae 309]	461	124480	10	2	8	1	2136	1	1	1	875.925	1749.84	2	1749.82	0.019	0	122.41	1e-06	K	GGSQNNEEVQTTYPVK	S				File: 90.wiff, Sample: 90 (sample number 1), Elution: 20.204 min, Period: 1, Cycle(s): 3954 (Experiment 3)
15	H0PPY0	tr|H0PPY0|Cytadherence-related protein ORF6 Tax_Id=1112856 [Mycoplasma pneumoniae 309]	461	124480	10	2	8	1	2137	1	1	1	876.421	1750.83	2	1750.8	0.0273	0	103.73	7.3e-05	K	GGSQNNEEVQTTYPVK	S	Deamidated (NQ)	0.0000000001000000.0		File: 90.wiff, Sample: 90 (sample number 1), Elution: 20.87 min, Period: 1, Cycle(s): 3977 (Experiment 4)
15	H0PPY0	tr|H0PPY0|Cytadherence-related protein ORF6 Tax_Id=1112856 [Mycoplasma pneumoniae 309]	461	124480	10	2	8	1	2165	1	1	1	889.442	1776.87	2	1776.86	0.0114	0	46.56	40	K	LNESWPVYEPLDSTK	N				File: 90.wiff, Sample: 90 (sample number 1), Elution: 33.596 min, Period: 1, Cycle(s): 4494 (Experiment 3)
15	H0PPY0	tr|H0PPY0|Cytadherence-related protein ORF6 Tax_Id=1112856 [Mycoplasma pneumoniae 309]	461	124480	10	2	8	1	2238	1	1	1	925.966	1849.92	2	1849.91	0.0069	0	58.41	2.7	K	TVDEVINNPDILQSFF	K				File: 90.wiff, Sample: 90 (sample number 1), Elution: 41.966 min, Period: 1, Cycle(s): 4817 (Experiment 3)
Peak list data path	C:\Analyst Data\Projects\Michael\Pneumoniae\20120416\91.wiff
Peak list format	Mascot generic
Search type	MIS
Mascot version	2.3.02.04
Database	LudwigNR
Fasta file	LudwigNR_Q212_generic_forward.fasta
Total sequences	18379370
Total residues	6435939691
Sequences after taxonomy filter	18379370
Number of queries	2771
Variable modifications	--------------------------------------------------------
Identifier	Name	Delta	Neutral loss(es)
1	Deamidated (NQ)	0.984016
2	Oxidation (M)	15.9949	0	63.9983
3	Propionamide (C)	71.0371
Search Parameters	--------------------------------------------------------
Taxonomy filter	All entries
Enzyme	semiTrypsin
Maximum Missed Cleavages	3
Fixed modifications
Variable modifications	Deamidated (NQ),Oxidation (M),Propionamide (C)
Peptide Mass Tolerance	100
Peptide Mass Tolerance Units	ppm
Fragment Mass Tolerance	0.2
Fragment Mass Tolerance Units	Da
Mass values	Monoisotopic
Instrument type	ESI-QUAD-TOF
Format parameters	--------------------------------------------------------
Significance threshold	0.05
Max. number of hits	0
Use MudPIT protein scoring	0
Ions score cut-off	0
Include same-set proteins	0
Include sub-set proteins	0
Include unassigned	0
Require bold red	1
Use homology threshold	0
Group protein families	0
Protein hits	--------------------------------------------------------
prot_hit_num	prot_acc	prot_desc	prot_score	prot_mass	prot_matches	prot_matches_sig	prot_sequences	prot_sequences_sig	pep_query	pep_rank	pep_isbold	pep_isunique	pep_exp_mz	pep_exp_mr	pep_exp_z	pep_calc_mr	pep_delta	pep_miss	pep_score	pep_expect	pep_res_before	pep_seq	pep_res_after	pep_var_mod	pep_var_mod_pos	pep_summed_mod_pos	pep_scan_title
8	Q50341	sp|Q50341|Mgp-operon protein 3 Tax_Id=272634 [Mycoplasma pneumoniae]	565	130378	12	2	10	2	951	1	1	1	622.799	1243.58	2	1243.58	0.0006	0	62.37	0.74	R	VNGVAQDTVHFG	S	Deamidated (NQ)	0.010000000000.0		File: 91.wiff, Sample: 91 (sample number 1), Elution: 24.253 min, Period: 1, Cycle(s): 3522 (Experiment 3)
8	Q50341	sp|Q50341|Mgp-operon protein 3 Tax_Id=272634 [Mycoplasma pneumoniae]	565	130378	12	2	10	2	1026	1	1	1	636.291	1270.57	2	1270.57	-0.0011	0	63.55	0.47	W	STTAGLDSDGGYK	A				File: 91.wiff, Sample: 91 (sample number 1), Elution: 17.452 min, Period: 1, Cycle(s): 3281 (Experiment 2)
8	Q50341	sp|Q50341|Mgp-operon protein 3 Tax_Id=272634 [Mycoplasma pneumoniae]	565	130378	12	2	10	2	1443	1	1	1	698.823	1395.63	2	1395.63	0.001	0	50.76	10	W	YWVVGEDQESGK	A				File: 91.wiff, Sample: 91 (sample number 1), Elution: 24.11 min, Period: 1, Cycle(s): 3516 (Experiment 3)
8	Q50341	sp|Q50341|Mgp-operon protein 3 Tax_Id=272634 [Mycoplasma pneumoniae]	565	130378	12	2	10	2	1963	1	1	1	808.434	1614.85	2	1614.85	0.0025	0	52	10	K	TLQDLLVEQPVTPY	T				File: 91.wiff, Sample: 91 (sample number 1), Elution: 38.114 min, Period: 1, Cycle(s): 4070 (Experiment 2)
8	Q50341	sp|Q50341|Mgp-operon protein 3 Tax_Id=272634 [Mycoplasma pneumoniae]	565	130378	12	2	10	2	2014	1	1	1	825.369	1648.72	2	1648.73	-0.0017	0	89.88	0.0015	K	IEYLDGNFYGEDSK	I				File: 91.wiff, Sample: 91 (sample number 1), Elution: 28.009 min, Period: 1, Cycle(s): 3677 (Experiment 3)
8	Q50341	sp|Q50341|Mgp-operon protein 3 Tax_Id=272634 [Mycoplasma pneumoniae]	565	130378	12	2	10	2	2092	1	1	1	850.454	1698.89	2	1698.89	-0.0008	0	60.14	1.6	K	ALVENTAGLNGPINGLF	T				File: 91.wiff, Sample: 91 (sample number 1), Elution: 40.009 min, Period: 1, Cycle(s): 4143 (Experiment 2)
8	Q50341	sp|Q50341|Mgp-operon protein 3 Tax_Id=272634 [Mycoplasma pneumoniae]	565	130378	12	2	10	2	2178	1	1	1	876.43	1750.85	2	1750.8	0.0441	0	88.02	0.0027	K	GGSQNNEEVQTTYPVK	S	Deamidated (NQ)	0.0000100000000000.0		File: 91.wiff, Sample: 91 (sample number 1), Elution: 19.245 min, Period: 1, Cycle(s): 3333 (Experiment 4)
8	Q50341	sp|Q50341|Mgp-operon protein 3 Tax_Id=272634 [Mycoplasma pneumoniae]	565	130378	12	2	10	2	2198	8	1	1	883.948	1765.88	2	1765.87	0.0085	0	16.06	43000	K	ISTLESQATDGFANSLL	N				File: 91.wiff, Sample: 91 (sample number 1), Elution: 38.858 min, Period: 1, Cycle(s): 4096 (Experiment 3)
8	Q50341	sp|Q50341|Mgp-operon protein 3 Tax_Id=272634 [Mycoplasma pneumoniae]	565	130378	12	2	10	2	2210	1	1	1	889.433	1776.85	2	1776.86	-0.0056	0	41.77	120	K	LNESWPVYEPLDSTK	E				File: 91.wiff, Sample: 91 (sample number 1), Elution: 31.655 min, Period: 1, Cycle(s): 3817 (Experiment 4)
8	Q50341	sp|Q50341|Mgp-operon protein 3 Tax_Id=272634 [Mycoplasma pneumoniae]	565	130378	12	2	10	2	2211	6	1	1	889.436	1776.86	2	1776.86	0.0001	0	18.91	23000	K	LNESWPVYEPLDSTK	E				File: 91.wiff, Sample: 91 (sample number 1), Elution: 33.965 min, Period: 1, Cycle(s): 3909 (Experiment 4)
8	Q50341	sp|Q50341|Mgp-operon protein 3 Tax_Id=272634 [Mycoplasma pneumoniae]	565	130378	12	2	10	2	2214	10	1	1	889.927	1777.84	2	1777.84	-0.001	0	20.89	14000	K	LNESWPVYEPLDSTK	E	Deamidated (NQ)	0.010000000000000.0		File: 91.wiff, Sample: 91 (sample number 1), Elution: 32.834 min, Period: 1, Cycle(s): 3863 (Experiment 4)
8	Q50341	sp|Q50341|Mgp-operon protein 3 Tax_Id=272634 [Mycoplasma pneumoniae]	565	130378	12	2	10	2	2307	1	1	1	925.966	1849.92	2	1849.91	0.0069	0	61.69	1.3	K	TVDEVINNPDILQSFF	K				File: 91.wiff, Sample: 91 (sample number 1), Elution: 41.719 min, Period: 1, Cycle(s): 4211 (Experiment 3)
Peak list data path	C:\Analyst Data\Projects\Michael\Pneumoniae\20120416\92.wiff
Peak list format	Mascot generic
Search type	MIS
Mascot version	2.3.02.04
Database	LudwigNR
Fasta file	LudwigNR_Q212_generic_forward.fasta
Total sequences	18379370
Total residues	6435939691
Sequences after taxonomy filter	18379370
Number of queries	2407
Variable modifications	--------------------------------------------------------
Identifier	Name	Delta	Neutral loss(es)
1	Deamidated (NQ)	0.984016
2	Oxidation (M)	15.9949	0	63.9983
3	Propionamide (C)	71.0371
Search Parameters	--------------------------------------------------------
Taxonomy filter	All entries
Enzyme	semiTrypsin
Maximum Missed Cleavages	3
Fixed modifications
Variable modifications	Deamidated (NQ),Oxidation (M),Propionamide (C)
Peptide Mass Tolerance	100
Peptide Mass Tolerance Units	ppm
Fragment Mass Tolerance	0.2
Fragment Mass Tolerance Units	Da
Mass values	Monoisotopic
Instrument type	ESI-QUAD-TOF
Format parameters	--------------------------------------------------------
Significance threshold	0.05
Max. number of hits	0
Use MudPIT protein scoring	0
Ions score cut-off	0
Include same-set proteins	0
Include sub-set proteins	0
Include unassigned	0
Require bold red	1
Use homology threshold	0
Group protein families	0
Protein hits	--------------------------------------------------------
prot_hit_num	prot_acc	prot_desc	prot_score	prot_mass	prot_matches	prot_matches_sig	prot_sequences	prot_sequences_sig	pep_query	pep_rank	pep_isbold	pep_isunique	pep_exp_mz	pep_exp_mr	pep_exp_z	pep_calc_mr	pep_delta	pep_miss	pep_score	pep_expect	pep_res_before	pep_seq	pep_res_after	pep_var_mod	pep_var_mod_pos	pep_summed_mod_pos	pep_scan_title
5	Q50341	sp|Q50341|Mgp-operon protein 3 Tax_Id=272634 [Mycoplasma pneumoniae]	379	130378	8	1	8	1	1028	1	1	1	646.325	1290.63	2	1290.67	-0.0321	0	69.72	0.15	F	GSAESAVDLTTLK	D				File: 92.wiff, Sample: 92 (sample number 1), Elution: 27.04 min, Period: 1, Cycle(s): 4059 (Experiment 2)
5	Q50341	sp|Q50341|Mgp-operon protein 3 Tax_Id=272634 [Mycoplasma pneumoniae]	379	130378	8	1	8	1	1606	1	1	1	763.36	1524.7	2	1524.69	0.0102	0	29.71	1500	R	TGIEFNEDANTTTL	S				File: 92.wiff, Sample: 92 (sample number 1), Elution: 29.991 min, Period: 1, Cycle(s): 4171 (Experiment 2)
5	Q50341	sp|Q50341|Mgp-operon protein 3 Tax_Id=272634 [Mycoplasma pneumoniae]	379	130378	8	1	8	1	1776	3	1	1	808.426	1614.84	2	1614.85	-0.0136	0	33.91	660	K	TLQDLLVEQPVTPY	T				File: 92.wiff, Sample: 92 (sample number 1), Elution: 38.544 min, Period: 1, Cycle(s): 4473 (Experiment 2)
5	Q50341	sp|Q50341|Mgp-operon protein 3 Tax_Id=272634 [Mycoplasma pneumoniae]	379	130378	8	1	8	1	2007	1	1	1	889.433	1776.85	2	1776.86	-0.0056	0	57.93	2.9	K	LNESWPVYEPLDSTK	E				File: 92.wiff, Sample: 92 (sample number 1), Elution: 33.806 min, Period: 1, Cycle(s): 4308 (Experiment 3)
5	Q50341	sp|Q50341|Mgp-operon protein 3 Tax_Id=272634 [Mycoplasma pneumoniae]	379	130378	8	1	8	1	2087	1	1	1	935.905	1869.8	2	1869.8	-0.0018	0	74.65	0.048	K	FQDTTSSDQSNTNQNAL	S				File: 92.wiff, Sample: 92 (sample number 1), Elution: 19.528 min, Period: 1, Cycle(s): 3817 (Experiment 3)
5	Q50341	sp|Q50341|Mgp-operon protein 3 Tax_Id=272634 [Mycoplasma pneumoniae]	379	130378	8	1	8	1	2089	1	1	1	937.476	1872.94	2	1872.93	0.0119	0	42.22	110	R	DNGLVPIYNEGIVDIWG	R				File: 92.wiff, Sample: 92 (sample number 1), Elution: 42.033 min, Period: 1, Cycle(s): 4600 (Experiment 3)
5	Q50341	sp|Q50341|Mgp-operon protein 3 Tax_Id=272634 [Mycoplasma pneumoniae]	379	130378	8	1	8	1	2110	1	1	1	946.964	1891.91	2	1891.92	-0.0025	0	36.74	400	R	AGNSSETDALPNVITQLY	H				File: 92.wiff, Sample: 92 (sample number 1), Elution: 39.732 min, Period: 1, Cycle(s): 4515 (Experiment 2)
5	Q50341	sp|Q50341|Mgp-operon protein 3 Tax_Id=272634 [Mycoplasma pneumoniae]	379	130378	8	1	8	1	2320	1	1	1	1134.48	2266.95	2	2266.91	0.0403	0	51.97	11	K	ALNGSQSGSSDTSGSNSQDFASY	V	Deamidated (NQ)	0.00100000000000000000000.0		File: 92.wiff, Sample: 92 (sample number 1), Elution: 23.465 min, Period: 1, Cycle(s): 3928 (Experiment 2)
Shaves 3
Peak list data path	C:\Analyst Data\Projects\Michael\Pneumoniae\20120416\97.wiff
Peak list format	Mascot generic
Search type	MIS
Mascot version	2.3.02.04
Database	LudwigNR
Fasta file	LudwigNR_Q212_generic_forward.fasta
Total sequences	18379370
Total residues	6435939691
Sequences after taxonomy filter	18379370
Number of queries	3091
Variable modifications	--------------------------------------------------------
Identifier	Name	Delta	Neutral loss(es)
1	Deamidated (NQ)	0.984016
2	Oxidation (M)	15.9949	0	63.9983
3	Propionamide (C)	71.0371
Search Parameters	--------------------------------------------------------
Taxonomy filter	All entries
Enzyme	semiTrypsin
Maximum Missed Cleavages	3
Fixed modifications
Variable modifications	Deamidated (NQ),Oxidation (M),Propionamide (C)
Peptide Mass Tolerance	100
Peptide Mass Tolerance Units	ppm
Fragment Mass Tolerance	0.2
Fragment Mass Tolerance Units	Da
Mass values	Monoisotopic
Instrument type	ESI-QUAD-TOF
Format parameters	--------------------------------------------------------
Significance threshold	0.05
Max. number of hits	0
Use MudPIT protein scoring	0
Ions score cut-off	0
Include same-set proteins	0
Include sub-set proteins	0
Include unassigned	0
Require bold red	1
Use homology threshold	0
Group protein families	0
Protein hits	--------------------------------------------------------
prot_hit_num	prot_acc	prot_desc	prot_score	prot_mass	prot_matches	prot_matches_sig	prot_sequences	prot_sequences_sig	pep_query	pep_rank	pep_isbold	pep_isunique	pep_exp_mz	pep_exp_mr	pep_exp_z	pep_calc_mr	pep_delta	pep_miss	pep_score	pep_expect	pep_res_before	pep_seq	pep_res_after	pep_var_mod	pep_var_mod_pos	pep_summed_mod_pos	pep_scan_title
9	Q50341	sp|Q50341|Mgp-operon protein 3 Tax_Id=272634 [Mycoplasma pneumoniae]	199	130378	5	2	3	2	1894	1	1	1	654.359	1306.7	2	1306.71	-0.0026	0	61.02	0.99	L	HQMGVIVPGLEK	W				File: 97.wiff, Sample: 97 (sample number 1), Elution: 25.79 min, Period: 1, Cycle(s): 3678 (Experiment 4)
9	Q50341	sp|Q50341|Mgp-operon protein 3 Tax_Id=272634 [Mycoplasma pneumoniae]	199	130378	5	2	3	2	1953	1	1	1	662.356	1322.7	2	1322.7	-0.0042	0	78.35	0.018	L	HQMGVIVPGLEK	W	Oxidation (M)	0.002000000000.0		File: 97.wiff, Sample: 97 (sample number 1), Elution: 22.731 min, Period: 1, Cycle(s): 3547 (Experiment 2)
9	Q50341	sp|Q50341|Mgp-operon protein 3 Tax_Id=272634 [Mycoplasma pneumoniae]	199	130378	5	2	3	2	2670	1	1	1	833.418	1664.82	2	1664.83	-0.0106	0	39.06	210	R	AAHLHPSYELVDWK	R				File: 97.wiff, Sample: 97 (sample number 1), Elution: 30.906 min, Period: 1, Cycle(s): 3879 (Experiment 3)
9	Q50341	sp|Q50341|Mgp-operon protein 3 Tax_Id=272634 [Mycoplasma pneumoniae]	199	130378	5	2	3	2	2671	1	1	1	555.96	1664.86	3	1664.83	0.0281	0	52.66	8.8	R	AAHLHPSYELVDWK	R				File: 97.wiff, Sample: 97 (sample number 1), Elution: 45.724 min, Period: 1, Cycle(s): 4552 (Experiment 3)
9	Q50341	sp|Q50341|Mgp-operon protein 3 Tax_Id=272634 [Mycoplasma pneumoniae]	199	130378	5	2	3	2	2768	1	1	1	896.491	1790.97	2	1790.97	-0.0044	0	75.58	0.045	N	TAQALHQMGVIVPGLEK	W				File: 97.wiff, Sample: 97 (sample number 1), Elution: 33.02 min, Period: 1, Cycle(s): 3958 (Experiment 4)
Peak list data path	C:\Analyst Data\Projects\Michael\Pneumoniae\20120416\99.wiff
Peak list format	Mascot generic
Search type	MIS
Mascot version	2.3.02.04
Database	LudwigNR
Fasta file	LudwigNR_Q212_generic_forward.fasta
Total sequences	18379370
Total residues	6435939691
Sequences after taxonomy filter	18379370
Number of queries	2533
Variable modifications	--------------------------------------------------------
Identifier	Name	Delta	Neutral loss(es)
1	Deamidated (NQ)	0.984016
2	Oxidation (M)	15.9949	0	63.9983
3	Propionamide (C)	71.0371
Search Parameters	--------------------------------------------------------
Taxonomy filter	All entries
Enzyme	semiTrypsin
Maximum Missed Cleavages	3
Fixed modifications
Variable modifications	Deamidated (NQ),Oxidation (M),Propionamide (C)
Peptide Mass Tolerance	100
Peptide Mass Tolerance Units	ppm
Fragment Mass Tolerance	0.2
Fragment Mass Tolerance Units	Da
Mass values	Monoisotopic
Instrument type	ESI-QUAD-TOF
Format parameters	--------------------------------------------------------
Significance threshold	0.05
Max. number of hits	0
Use MudPIT protein scoring	0
Ions score cut-off	0
Include same-set proteins	0
Include sub-set proteins	0
Include unassigned	0
Require bold red	1
Use homology threshold	0
Group protein families	0
Protein hits	--------------------------------------------------------
prot_hit_num	prot_acc	prot_desc	prot_score	prot_mass	prot_matches	prot_matches_sig	prot_sequences	prot_sequences_sig	pep_query	pep_rank	pep_isbold	pep_isunique	pep_exp_mz	pep_exp_mr	pep_exp_z	pep_calc_mr	pep_delta	pep_miss	pep_score	pep_expect	pep_res_before	pep_seq	pep_res_after	pep_var_mod	pep_var_mod_pos	pep_summed_mod_pos	pep_scan_title
34	H0PPY0	tr|H0PPY0|Cytadherence-related protein ORF6 Tax_Id=1112856 [Mycoplasma pneumoniae 309]	106	124480	3	0	3	0	475	1	1	1	499.797	997.579	2	997.581	-0.002	0	37.37	110	K	IASLINASPL	N				File: 99.wiff, Sample: 99 (sample number 1), Elution: 32.572 min, Period: 1, Cycle(s): 4224 (Experiment 4)
34	H0PPY0	tr|H0PPY0|Cytadherence-related protein ORF6 Tax_Id=1112856 [Mycoplasma pneumoniae 309]	106	124480	3	0	3	0	1768	2	1	1	693.86	1385.71	2	1385.7	0.0078	0	30.25	1400	H	LHPSYELVDWK	R				File: 99.wiff, Sample: 99 (sample number 1), Elution: 28.739 min, Period: 1, Cycle(s): 4062 (Experiment 2)
34	H0PPY0	tr|H0PPY0|Cytadherence-related protein ORF6 Tax_Id=1112856 [Mycoplasma pneumoniae 309]	106	124480	3	0	3	0	2071	1	1	1	769.374	1536.73	2	1536.74	-0.0035	0	44.83	50	R	AAHLHPSYELVDW	K				File: 99.wiff, Sample: 99 (sample number 1), Elution: 31.159 min, Period: 1, Cycle(s): 4160 (Experiment 4)
Peak list data path	C:\Analyst Data\Projects\Michael\Pneumoniae\20120416\100.wiff
Peak list format	Mascot generic
Search type	MIS
Mascot version	2.3.02.04
Database	LudwigNR
Fasta file	LudwigNR_Q212_generic_forward.fasta
Total sequences	18379370
Total residues	6435939691
Sequences after taxonomy filter	18379370
Number of queries	2869
Variable modifications	--------------------------------------------------------
Identifier	Name	Delta	Neutral loss(es)
1	Deamidated (NQ)	0.984016
2	Oxidation (M)	15.9949	0	63.9983
3	Propionamide (C)	71.0371
Search Parameters	--------------------------------------------------------
Taxonomy filter	All entries
Enzyme	semiTrypsin
Maximum Missed Cleavages	3
Fixed modifications
Variable modifications	Deamidated (NQ),Oxidation (M),Propionamide (C)
Peptide Mass Tolerance	100
Peptide Mass Tolerance Units	ppm
Fragment Mass Tolerance	0.2
Fragment Mass Tolerance Units	Da
Mass values	Monoisotopic
Instrument type	ESI-QUAD-TOF
Format parameters	--------------------------------------------------------
Significance threshold	0.05
Max. number of hits	0
Use MudPIT protein scoring	0
Ions score cut-off	0
Include same-set proteins	0
Include sub-set proteins	0
Include unassigned	0
Require bold red	1
Use homology threshold	0
Group protein families	0
Protein hits	--------------------------------------------------------
prot_hit_num	prot_acc	prot_desc	prot_score	prot_mass	prot_matches	prot_matches_sig	prot_sequences	prot_sequences_sig	pep_query	pep_rank	pep_isbold	pep_isunique	pep_exp_mz	pep_exp_mr	pep_exp_z	pep_calc_mr	pep_delta	pep_miss	pep_score	pep_expect	pep_res_before	pep_seq	pep_res_after	pep_var_mod	pep_var_mod_pos	pep_summed_mod_pos	pep_scan_title
20	Q50341	sp|Q50341|Mgp-operon protein 3 Tax_Id=272634 [Mycoplasma pneumoniae]	295	130378	6	2	5	1	342	1	1	1	494.769	987.522	2	987.524	-0.0012	0	44.47	44	Y	GIVNESELK	S				File: 100.wiff, Sample: 100 (sample number 1), Elution: 21.769 min, Period: 1, Cycle(s): 3781 (Experiment 4)
20	Q50341	sp|Q50341|Mgp-operon protein 3 Tax_Id=272634 [Mycoplasma pneumoniae]	295	130378	6	2	5	1	1081	1	1	1	627.309	1252.6	2	1252.59	0.011	0	33.32	570	N	ALSFDTQESQK	A				File: 100.wiff, Sample: 100 (sample number 1), Elution: 21.396 min, Period: 1, Cycle(s): 3766 (Experiment 2)
20	Q50341	sp|Q50341|Mgp-operon protein 3 Tax_Id=272634 [Mycoplasma pneumoniae]	295	130378	6	2	5	1	1191	1	1	1	646.329	1290.64	2	1290.67	-0.0225	0	49.37	16	F	GSAESAVDLTTLK	D				File: 100.wiff, Sample: 100 (sample number 1), Elution: 24.299 min, Period: 1, Cycle(s): 3896 (Experiment 4)
20	Q50341	sp|Q50341|Mgp-operon protein 3 Tax_Id=272634 [Mycoplasma pneumoniae]	295	130378	6	2	5	1	1695	1	1	1	736.345	1470.67	2	1470.66	0.0117	0	64.49	0.49	Y	TFDNGEKPTYDGK	Q				File: 100.wiff, Sample: 100 (sample number 1), Elution: 18.192 min, Period: 1, Cycle(s): 3660 (Experiment 2)
20	Q50341	sp|Q50341|Mgp-operon protein 3 Tax_Id=272634 [Mycoplasma pneumoniae]	295	130378	6	2	5	1	2252	1	1	1	875.923	1749.83	2	1749.82	0.0134	0	114.35	6.4e-06	K	GGSQNNEEVQTTYPVK	S				File: 100.wiff, Sample: 100 (sample number 1), Elution: 19.096 min, Period: 1, Cycle(s): 3687 (Experiment 3)
20	Q50341	sp|Q50341|Mgp-operon protein 3 Tax_Id=272634 [Mycoplasma pneumoniae]	295	130378	6	2	5	1	2255	1	1	1	876.416	1750.82	2	1750.8	0.0161	0	75.04	0.053	K	GGSQNNEEVQTTYPVK	S	Deamidated (NQ)	0.0000000001000000.0		File: 100.wiff, Sample: 100 (sample number 1), Elution: 19.831 min, Period: 1, Cycle(s): 3709 (Experiment 3)
Peak list data path	C:\Analyst Data\Projects\Michael\Pneumoniae\20120416\101.wiff
Peak list format	Mascot generic
Search type	MIS
Mascot version	2.3.02.04
Database	LudwigNR
Fasta file	LudwigNR_Q212_generic_forward.fasta
Total sequences	18379370
Total residues	6435939691
Sequences after taxonomy filter	18379370
Number of queries	2865
Variable modifications	--------------------------------------------------------
Identifier	Name	Delta	Neutral loss(es)
1	Deamidated (NQ)	0.984016
2	Oxidation (M)	15.9949	0	63.9983
3	Propionamide (C)	71.0371
Search Parameters	--------------------------------------------------------
Taxonomy filter	All entries
Enzyme	semiTrypsin
Maximum Missed Cleavages	3
Fixed modifications
Variable modifications	Deamidated (NQ),Oxidation (M),Propionamide (C)
Peptide Mass Tolerance	100
Peptide Mass Tolerance Units	ppm
Fragment Mass Tolerance	0.2
Fragment Mass Tolerance Units	Da
Mass values	Monoisotopic
Instrument type	ESI-QUAD-TOF
Format parameters	--------------------------------------------------------
Significance threshold	0.05
Max. number of hits	0
Use MudPIT protein scoring	0
Ions score cut-off	0
Include same-set proteins	0
Include sub-set proteins	0
Include unassigned	0
Require bold red	1
Use homology threshold	0
Group protein families	0
Protein hits	--------------------------------------------------------
prot_hit_num	prot_acc	prot_desc	prot_score	prot_mass	prot_matches	prot_matches_sig	prot_sequences	prot_sequences_sig	pep_query	pep_rank	pep_isbold	pep_isunique	pep_exp_mz	pep_exp_mr	pep_exp_z	pep_calc_mr	pep_delta	pep_miss	pep_score	pep_expect	pep_res_before	pep_seq	pep_res_after	pep_var_mod	pep_var_mod_pos	pep_summed_mod_pos	pep_scan_title
18	Q50341	sp|Q50341|Mgp-operon protein 3 Tax_Id=272634 [Mycoplasma pneumoniae]	355	130378	8	0	8	0	530	9	1	1	574.305	1146.6	2	1146.61	-0.0171	0	25.99	3300	S	AESAVDLTTLK	D				File: 101.wiff, Sample: 101 (sample number 1), Elution: 22.897 min, Period: 1, Cycle(s): 3581 (Experiment 3)
18	Q50341	sp|Q50341|Mgp-operon protein 3 Tax_Id=272634 [Mycoplasma pneumoniae]	355	130378	8	0	8	0	795	2	1	1	621.835	1241.66	2	1241.66	-0.0054	0	36.94	240	F	TTPLNGGLDVVR	A	Deamidated (NQ)	0.000010000000.0		File: 101.wiff, Sample: 101 (sample number 1), Elution: 23.098 to 23.312 min, Period: 1, Cycle(s): 3591, 3601 (Experiment 2)
18	Q50341	sp|Q50341|Mgp-operon protein 3 Tax_Id=272634 [Mycoplasma pneumoniae]	355	130378	8	0	8	0	828	1	1	1	627.305	1252.6	2	1252.59	0.0015	0	28.05	1900	N	ALSFDTQESQK	A				File: 101.wiff, Sample: 101 (sample number 1), Elution: 20.104 min, Period: 1, Cycle(s): 3463 (Experiment 2)
18	Q50341	sp|Q50341|Mgp-operon protein 3 Tax_Id=272634 [Mycoplasma pneumoniae]	355	130378	8	0	8	0	892	1	1	1	636.293	1270.57	2	1270.57	0.0036	0	62.47	0.6	W	STTAGLDSDGGYK	A				File: 101.wiff, Sample: 101 (sample number 1), Elution: 17.022 min, Period: 1, Cycle(s): 3349 (Experiment 3)
18	Q50341	sp|Q50341|Mgp-operon protein 3 Tax_Id=272634 [Mycoplasma pneumoniae]	355	130378	8	0	8	0	921	1	1	1	642.826	1283.64	2	1283.64	-0.0017	0	48.61	17	K	LQDSSFVDVFK	K				File: 101.wiff, Sample: 101 (sample number 1), Elution: 30.192 min, Period: 1, Cycle(s): 3882 (Experiment 4)
18	Q50341	sp|Q50341|Mgp-operon protein 3 Tax_Id=272634 [Mycoplasma pneumoniae]	355	130378	8	0	8	0	944	1	1	1	646.339	1290.66	2	1290.67	-0.0032	0	68.5	0.2	F	GSAESAVDLTTLK	D				File: 101.wiff, Sample: 101 (sample number 1), Elution: 22.808 min, Period: 1, Cycle(s): 3577 (Experiment 3)
18	Q50341	sp|Q50341|Mgp-operon protein 3 Tax_Id=272634 [Mycoplasma pneumoniae]	355	130378	8	0	8	0	1314	1	1	1	698.821	1395.63	2	1395.63	-0.004	0	40.31	110	W	YWVVGEDQESGK	A				File: 101.wiff, Sample: 101 (sample number 1), Elution: 22.07 to 22.287 min, Period: 1, Cycle(s): 3544 (Experiment 3), 3553 (Experiment 4)
18	Q50341	sp|Q50341|Mgp-operon protein 3 Tax_Id=272634 [Mycoplasma pneumoniae]	355	130378	8	0	8	0	2184	1	1	1	889.439	1776.86	2	1776.86	0.0057	0	61.62	1.2	K	LNESWPVYEPLDSTK	E				File: 101.wiff, Sample: 101 (sample number 1), Elution: 28.743 min, Period: 1, Cycle(s): 3825 (Experiment 2)
Peak list data path	C:\Analyst Data\Projects\Michael\Pneumoniae\20120416\102.wiff
Peak list format	Mascot generic
Search type	MIS
Mascot version	2.3.02.04
Database	LudwigNR
Fasta file	LudwigNR_Q212_generic_forward.fasta
Total sequences	18379370
Total residues	6435939691
Sequences after taxonomy filter	18379370
Number of queries	2519
Variable modifications	--------------------------------------------------------
Identifier	Name	Delta	Neutral loss(es)
1	Deamidated (NQ)	0.984016
2	Oxidation (M)	15.9949	0	63.9983
3	Propionamide (C)	71.0371
Search Parameters	--------------------------------------------------------
Taxonomy filter	All entries
Enzyme	semiTrypsin
Maximum Missed Cleavages	3
Fixed modifications
Variable modifications	Deamidated (NQ),Oxidation (M),Propionamide (C)
Peptide Mass Tolerance	100
Peptide Mass Tolerance Units	ppm
Fragment Mass Tolerance	0.2
Fragment Mass Tolerance Units	Da
Mass values	Monoisotopic
Instrument type	ESI-QUAD-TOF
Format parameters	--------------------------------------------------------
Significance threshold	0.05
Max. number of hits	0
Use MudPIT protein scoring	0
Ions score cut-off	0
Include same-set proteins	0
Include sub-set proteins	0
Include unassigned	0
Require bold red	1
Use homology threshold	0
Group protein families	0
Protein hits	--------------------------------------------------------
prot_hit_num	prot_acc	prot_desc	prot_score	prot_mass	prot_matches	prot_matches_sig	prot_sequences	prot_sequences_sig	pep_query	pep_rank	pep_isbold	pep_isunique	pep_exp_mz	pep_exp_mr	pep_exp_z	pep_calc_mr	pep_delta	pep_miss	pep_score	pep_expect	pep_res_before	pep_seq	pep_res_after	pep_var_mod	pep_var_mod_pos	pep_summed_mod_pos	pep_scan_title
6	Q50341	sp|Q50341|Mgp-operon protein 3 Tax_Id=272634 [Mycoplasma pneumoniae]	389	130378	9	1	9	1	945	8	1	1	645.328	1288.64	2	1288.64	-0.0026	0	20.58	12000	Y	LNGQIVVMGSDR	V	Deamidated (NQ)	0.000100000000.0		File: 102.wiff, Sample: 102 (sample number 1), Elution: 23.866 min, Period: 1, Cycle(s): 3747 (Experiment 2)
6	Q50341	sp|Q50341|Mgp-operon protein 3 Tax_Id=272634 [Mycoplasma pneumoniae]	389	130378	9	1	9	1	1843	1	1	1	825.388	1648.76	2	1648.73	0.0364	0	75.82	0.043	K	IEYLDGNFYGEDSK	I				File: 102.wiff, Sample: 102 (sample number 1), Elution: 26.999 min, Period: 1, Cycle(s): 3879 (Experiment 2)
6	Q50341	sp|Q50341|Mgp-operon protein 3 Tax_Id=272634 [Mycoplasma pneumoniae]	389	130378	9	1	9	1	1844	1	1	1	825.396	1648.78	2	1648.76	0.0163	0	24.95	5300	K	LNESWPVYEPLDST	K				File: 102.wiff, Sample: 102 (sample number 1), Elution: 33.996 min, Period: 1, Cycle(s): 4129 (Experiment 3)
6	Q50341	sp|Q50341|Mgp-operon protein 3 Tax_Id=272634 [Mycoplasma pneumoniae]	389	130378	9	1	9	1	1926	1	1	1	850.959	1699.9	2	1699.88	0.0261	0	44.84	53	K	ALVENTAGLNGPINGLF	T	Deamidated (NQ)	0.00000000010000000.0		File: 102.wiff, Sample: 102 (sample number 1), Elution: 39.688 min, Period: 1, Cycle(s): 4343 (Experiment 4)
6	Q50341	sp|Q50341|Mgp-operon protein 3 Tax_Id=272634 [Mycoplasma pneumoniae]	389	130378	9	1	9	1	2010	5	1	1	883.945	1765.88	2	1765.87	0.0029	0	19.15	21000	K	ISTLESQATDGFANSLL	N				File: 102.wiff, Sample: 102 (sample number 1), Elution: 37.157 min, Period: 1, Cycle(s): 4250 (Experiment 2)
6	Q50341	sp|Q50341|Mgp-operon protein 3 Tax_Id=272634 [Mycoplasma pneumoniae]	389	130378	9	1	9	1	2256	1	1	1	1015.53	2029.04	2	2029.03	0.0122	0	59.02	2.4	R	DNGLVPIYNEGIVDIWGR	V				File: 102.wiff, Sample: 102 (sample number 1), Elution: 40.295 min, Period: 1, Cycle(s): 4367 (Experiment 4)
6	Q50341	sp|Q50341|Mgp-operon protein 3 Tax_Id=272634 [Mycoplasma pneumoniae]	389	130378	9	1	9	1	2334	1	1	1	1077.04	2152.07	2	2152.07	0.0001	0	31.05	1600	K	IASLINASPLNSYGDDGVTVF	D				File: 102.wiff, Sample: 102 (sample number 1), Elution: 40.008 min, Period: 1, Cycle(s): 4356 (Experiment 3)
6	Q50341	sp|Q50341|Mgp-operon protein 3 Tax_Id=272634 [Mycoplasma pneumoniae]	389	130378	9	1	9	1	2466	1	1	1	859.781	2576.32	3	2576.32	-0.0016	0	65.55	0.65	N	GIASSQDDLTGILPLSDEFSAVITK	D				File: 102.wiff, Sample: 102 (sample number 1), Elution: 40.774 min, Period: 1, Cycle(s): 4386 (Experiment 2)
6	Q50341	sp|Q50341|Mgp-operon protein 3 Tax_Id=272634 [Mycoplasma pneumoniae]	389	130378	9	1	9	1	2496	1	1	1	997.521	2989.54	3	2989.51	0.0291	0	73.27	0.12	L	AVQNGIASSQDDLTGILPLSDEFSAVITK	D	Deamidated (NQ)	0.00010000000000000000000000000.0		File: 102.wiff, Sample: 102 (sample number 1), Elution: 40.712 min, Period: 1, Cycle(s): 4383 (Experiment 3)
Peak list data path	C:\Analyst Data\Projects\Michael\Pneumoniae\20120416\103.wiff
Peak list format	Mascot generic
Search type	MIS
Mascot version	2.3.02.04
Database	LudwigNR
Fasta file	LudwigNR_Q212_generic_forward.fasta
Total sequences	18379370
Total residues	6435939691
Sequences after taxonomy filter	18379370
Number of queries	2314
Variable modifications	--------------------------------------------------------
Identifier	Name	Delta	Neutral loss(es)
1	Deamidated (NQ)	0.984016
2	Oxidation (M)	15.9949	0	63.9983
3	Propionamide (C)	71.0371
Search Parameters	--------------------------------------------------------
Taxonomy filter	All entries
Enzyme	semiTrypsin
Maximum Missed Cleavages	3
Fixed modifications
Variable modifications	Deamidated (NQ),Oxidation (M),Propionamide (C)
Peptide Mass Tolerance	100
Peptide Mass Tolerance Units	ppm
Fragment Mass Tolerance	0.2
Fragment Mass Tolerance Units	Da
Mass values	Monoisotopic
Instrument type	ESI-QUAD-TOF
Format parameters	--------------------------------------------------------
Significance threshold	0.05
Max. number of hits	0
Use MudPIT protein scoring	0
Ions score cut-off	0
Include same-set proteins	0
Include sub-set proteins	0
Include unassigned	0
Require bold red	1
Use homology threshold	0
Group protein families	0
Protein hits	--------------------------------------------------------
prot_hit_num	prot_acc	prot_desc	prot_score	prot_mass	prot_matches	prot_matches_sig	prot_sequences	prot_sequences_sig	pep_query	pep_rank	pep_isbold	pep_isunique	pep_exp_mz	pep_exp_mr	pep_exp_z	pep_calc_mr	pep_delta	pep_miss	pep_score	pep_expect	pep_res_before	pep_seq	pep_res_after	pep_var_mod	pep_var_mod_pos	pep_summed_mod_pos	pep_scan_title
3	Q50341	sp|Q50341|Mgp-operon protein 3 Tax_Id=272634 [Mycoplasma pneumoniae]	618	130378	16	1	14	1	635	1	1	1	594.296	1186.58	2	1186.56	0.0147	0	42.66	71	R	VNGVAQDTVHF	G	Deamidated (NQ)	0.01000000000.0		File: 103.wiff, Sample: 103 (sample number 1), Elution: 26.955 min, Period: 1, Cycle(s): 3962 (Experiment 4)
3	Q50341	sp|Q50341|Mgp-operon protein 3 Tax_Id=272634 [Mycoplasma pneumoniae]	618	130378	16	1	14	1	829	1	1	1	634.808	1267.6	2	1267.59	0.0082	0	27.37	2200	K	ISTLESQATDGF	A				File: 103.wiff, Sample: 103 (sample number 1), Elution: 27.67 min, Period: 1, Cycle(s): 3989 (Experiment 2)
3	Q50341	sp|Q50341|Mgp-operon protein 3 Tax_Id=272634 [Mycoplasma pneumoniae]	618	130378	16	1	14	1	1314	3	1	1	735.373	1468.73	2	1468.74	-0.0087	0	37.46	260	K	TVDEVINNPDILQ	S				File: 103.wiff, Sample: 103 (sample number 1), Elution: 29.691 min, Period: 1, Cycle(s): 4063 (Experiment 3)
3	Q50341	sp|Q50341|Mgp-operon protein 3 Tax_Id=272634 [Mycoplasma pneumoniae]	618	130378	16	1	14	1	1451	1	1	1	763.373	1524.73	2	1524.69	0.0364	0	24.5	5200	R	TGIEFNEDANTTTL	S				File: 103.wiff, Sample: 103 (sample number 1), Elution: 28.79 min, Period: 1, Cycle(s): 4028 (Experiment 4)
3	Q50341	sp|Q50341|Mgp-operon protein 3 Tax_Id=272634 [Mycoplasma pneumoniae]	618	130378	16	1	14	1	1634	1	1	1	808.428	1614.84	2	1614.85	-0.0082	0	57.14	3.1	K	TLQDLLVEQPVTPY	T				File: 103.wiff, Sample: 103 (sample number 1), Elution: 37.289 min, Period: 1, Cycle(s): 4345 (Experiment 3)
3	Q50341	sp|Q50341|Mgp-operon protein 3 Tax_Id=272634 [Mycoplasma pneumoniae]	618	130378	16	1	14	1	1635	2	1	1	808.897	1615.78	2	1615.77	0.0105	0	25.73	4500	R	AGNSSETDALPNVITQ	L				File: 103.wiff, Sample: 103 (sample number 1), Elution: 27.203 min, Period: 1, Cycle(s): 3973 (Experiment 2)
3	Q50341	sp|Q50341|Mgp-operon protein 3 Tax_Id=272634 [Mycoplasma pneumoniae]	618	130378	16	1	14	1	1679	1	1	1	825.396	1648.78	2	1648.76	0.0163	0	26.29	3900	K	LNESWPVYEPLDST	K				File: 103.wiff, Sample: 103 (sample number 1), Elution: 34.742 min, Period: 1, Cycle(s): 4257 (Experiment 2)
3	Q50341	sp|Q50341|Mgp-operon protein 3 Tax_Id=272634 [Mycoplasma pneumoniae]	618	130378	16	1	14	1	1784	1	1	1	851.446	1700.88	2	1700.86	0.0147	0	26.22	4100	K	ALVENTAGLNGPINGLF	T	2 Deamidated (NQ)	0.00001000000001000.0		File: 103.wiff, Sample: 103 (sample number 1), Elution: 38.756 to 38.823 min, Period: 1, Cycle(s): 4395, 4397 (Experiment 2), 4397 (Experiment 3)
3	Q50341	sp|Q50341|Mgp-operon protein 3 Tax_Id=272634 [Mycoplasma pneumoniae]	618	130378	16	1	14	1	1790	1	1	1	852.933	1703.85	2	1703.83	0.026	0	49.69	19	K	TVDEVINNPDILQSF	F	Deamidated (NQ)	0.000000000000100.0		File: 103.wiff, Sample: 103 (sample number 1), Elution: 39.541 min, Period: 1, Cycle(s): 4424 (Experiment 2)
3	Q50341	sp|Q50341|Mgp-operon protein 3 Tax_Id=272634 [Mycoplasma pneumoniae]	618	130378	16	1	14	1	1804	1	1	1	856.865	1711.72	2	1711.69	0.0268	0	49.61	13	K	AGAVGYDMTTDSSASTY	N	Oxidation (M)	0.00000002000000000.0		File: 103.wiff, Sample: 103 (sample number 1), Elution: 19.568 min, Period: 1, Cycle(s): 3706 (Experiment 2)
3	Q50341	sp|Q50341|Mgp-operon protein 3 Tax_Id=272634 [Mycoplasma pneumoniae]	618	130378	16	1	14	1	1894	1	1	1	884.438	1766.86	2	1766.86	0.0044	0	35.94	440	K	ISTLESQATDGFANSLL	N	Deamidated (NQ)	0.00000000000001000.0		File: 103.wiff, Sample: 103 (sample number 1), Elution: 36.174 min, Period: 1, Cycle(s): 4308 (Experiment 2)
3	Q50341	sp|Q50341|Mgp-operon protein 3 Tax_Id=272634 [Mycoplasma pneumoniae]	618	130378	16	1	14	1	1971	10	1	1	925.966	1849.92	2	1849.91	0.0069	0	26.89	3800	K	TVDEVINNPDILQSFF	K				File: 103.wiff, Sample: 103 (sample number 1), Elution: 41.249 min, Period: 1, Cycle(s): 4486 (Experiment 2)
3	Q50341	sp|Q50341|Mgp-operon protein 3 Tax_Id=272634 [Mycoplasma pneumoniae]	618	130378	16	1	14	1	1972	1	1	1	926.464	1850.91	2	1850.89	0.0201	0	63.54	0.81	K	TVDEVINNPDILQSFF	K	Deamidated (NQ)	0.0000000000001000.0		File: 103.wiff, Sample: 103 (sample number 1), Elution: 41.606 min, Period: 1, Cycle(s): 4498 (Experiment 2)
3	Q50341	sp|Q50341|Mgp-operon protein 3 Tax_Id=272634 [Mycoplasma pneumoniae]	618	130378	16	1	14	1	1991	1	1	1	935.908	1869.8	2	1869.8	0.004	0	109.4	1.7e-05	K	FQDTTSSDQSNTNQNAL	S				File: 103.wiff, Sample: 103 (sample number 1), Elution: 18.344 min, Period: 1, Cycle(s): 3646 (Experiment 2)
3	Q50341	sp|Q50341|Mgp-operon protein 3 Tax_Id=272634 [Mycoplasma pneumoniae]	618	130378	16	1	14	1	1992	4	1	1	936.412	1870.81	2	1870.78	0.0283	0	17.56	27000	K	FQDTTSSDQSNTNQNAL	S	Deamidated (NQ)	0.00000000000000100.0		File: 103.wiff, Sample: 103 (sample number 1), Elution: 18.951 min, Period: 1, Cycle(s): 3686 (Experiment 2)
3	Q50341	sp|Q50341|Mgp-operon protein 3 Tax_Id=272634 [Mycoplasma pneumoniae]	618	130378	16	1	14	1	2288	1	1	1	997.524	2989.55	3	2989.51	0.038	0	74.74	0.084	L	AVQNGIASSQDDLTGILPLSDEFSAVITK	D	Deamidated (NQ)	0.00010000000000000000000000000.0		File: 103.wiff, Sample: 103 (sample number 1), Elution: 40.961 min, Period: 1, Cycle(s): 4475 (Experiment 3)

## Sheet: Heparin
Found in gel mass range 38-45 kDa
Peak list data path	C:\Analyst Data\Projects\Mycoplasma\Michael\Pneumoniae\20130322\MPN Heparin2_41.wiff
Peak list format	Mascot generic
Search type	MIS
Mascot version	2.4.1
Database	1::contaminants 2::LudwigNR
Fasta file	1::contaminants_all_09092011.fasta 2::LudwigNR_Q113_generic_forward.fasta
Total sequences	19263279
Total residues	6990931504
Sequences after taxonomy filter	11991699
Number of queries	1085
Warning	No taxonomy indexes for contaminants, taxonomy ~Bacteria (Eubacteria)~ ignored. Searching all entries in contaminants
Variable modifications	--------------------------------------------------------
Identifier	Name	Delta	Neutral loss(es)
1	Deamidated (NQ)	0.984016
2	Oxidation (M)	15.9949	0	63.9983
3	Propionamide (C)	71.0371
Search Parameters	--------------------------------------------------------
Taxonomy filter	. . Bacteria (Eubacteria)
Enzyme	semiTrypsin
Maximum Missed Cleavages	3
Fixed modifications
Variable modifications	Deamidated (NQ),Oxidation (M),Propionamide (C)
Peptide Mass Tolerance	100
Peptide Mass Tolerance Units	ppm
Fragment Mass Tolerance	0.2
Fragment Mass Tolerance Units	Da
Mass values	Monoisotopic
Instrument type	ESI-QUAD-TOF
Format parameters	--------------------------------------------------------
Significance threshold	0.05
Max. number of hits	0
Use MudPIT protein scoring	0
Ions score cut-off	0
Include same-set proteins	0
Include sub-set proteins	0
Include unassigned	0
Require bold red	1
Use homology threshold	0
Group protein families	0
Protein hits	--------------------------------------------------------
prot_hit_num	prot_acc	prot_desc	prot_score	prot_mass	prot_matches	prot_matches_sig	prot_sequences	prot_sequences_sig	pep_query	pep_rank	pep_isbold	pep_isunique	pep_exp_mz	pep_exp_mr	pep_exp_z	pep_calc_mr	pep_delta	pep_miss	pep_score	pep_expect	pep_res_before	pep_seq	pep_res_after	pep_var_mod	pep_var_mod_pos	pep_summed_mod_pos	pep_scan_title
35	2::E1QBR0	tr|E1QBR0|mgpC_3 MgpC protein Tax_Id=722438 [Mycoplasma pneumoniae (strain ATCC 15531 / NBRC 14401 / NCTC 10119 / FH)]	183	124466	4	1	4	1	560	1	1	1	833.453	1664.89	2	1664.83	0.0608	0	50.91	7	R	AAHLHPSYELVDWK	R				File: MPN Heparin2_41.wiff, Sample: 20130322 MPN Heparin2_41 (sample number 1), Elution: 33.855 min, Period: 1, Cycle(s): 6315 (Experiment 3)
35	2::E1QBR0	tr|E1QBR0|mgpC_3 MgpC protein Tax_Id=722438 [Mycoplasma pneumoniae (strain ATCC 15531 / NBRC 14401 / NCTC 10119 / FH)]	183	124466	4	1	4	1	621	1	1	1	889.47	1776.93	2	1776.86	0.0685	0	42.9	49	K	LNESWPVYEPLDSTK	N				File: MPN Heparin2_41.wiff, Sample: 20130322 MPN Heparin2_41 (sample number 1), Elution: 36.641 min, Period: 1, Cycle(s): 6399 (Experiment 4)
35	2::E1QBR0	tr|E1QBR0|mgpC_3 MgpC protein Tax_Id=722438 [Mycoplasma pneumoniae (strain ATCC 15531 / NBRC 14401 / NCTC 10119 / FH)]	183	124466	4	1	4	1	702	1	1	1	953.526	1905.04	2	1904.95	0.0853	1	75.07	0.029	R	KLNESWPVYEPLDSTK	N				File: MPN Heparin2_41.wiff, Sample: 20130322 MPN Heparin2_41 (sample number 1), Elution: 35.453 min, Period: 1, Cycle(s): 6368 (Experiment 4)
35	2::E1QBR0	tr|E1QBR0|mgpC_3 MgpC protein Tax_Id=722438 [Mycoplasma pneumoniae (strain ATCC 15531 / NBRC 14401 / NCTC 10119 / FH)]	183	124466	4	1	4	1	909	1	1	1	799.464	2395.37	3	2395.27	0.096	0	23.43	4100	K	TLQDLLVEQPVTPYTPNAGLAR	V				File: MPN Heparin2_41.wiff, Sample: 20130322 MPN Heparin2_41 (sample number 1), Elution: 39.348 min, Period: 1, Cycle(s): 6484 (Experiment 2)
Found in gel mass range 11-17 kDa
Peak list data path	C:\Analyst Data\Projects\Mycoplasma\Michael\Pneumoniae\20130322\MPN Heparin2_46.wiff
Peak list format	Mascot generic
Search type	MIS
Mascot version	2.4.1
Database	1::contaminants 2::LudwigNR
Fasta file	1::contaminants_all_09092011.fasta 2::LudwigNR_Q113_generic_forward.fasta
Total sequences	19263279
Total residues	6990931504
Sequences after taxonomy filter	11991699
Number of queries	743
Warning	No taxonomy indexes for contaminants, taxonomy ~Bacteria (Eubacteria)~ ignored. Searching all entries in contaminants
Variable modifications	--------------------------------------------------------
Identifier	Name	Delta	Neutral loss(es)
1	Deamidated (NQ)	0.984016
2	Oxidation (M)	15.9949	0	63.9983
3	Propionamide (C)	71.0371
Search Parameters	--------------------------------------------------------
Taxonomy filter	. . Bacteria (Eubacteria)
Enzyme	semiTrypsin
Maximum Missed Cleavages	3
Fixed modifications
Variable modifications	Deamidated (NQ),Oxidation (M),Propionamide (C)
Peptide Mass Tolerance	100
Peptide Mass Tolerance Units	ppm
Fragment Mass Tolerance	0.2
Fragment Mass Tolerance Units	Da
Mass values	Monoisotopic
Instrument type	ESI-QUAD-TOF
Format parameters	--------------------------------------------------------
Significance threshold	0.05
Max. number of hits	0
Use MudPIT protein scoring	0
Ions score cut-off	0
Include same-set proteins	0
Include sub-set proteins	0
Include unassigned	0
Require bold red	1
Use homology threshold	0
Group protein families	0
Protein hits	--------------------------------------------------------
prot_hit_num	prot_acc	prot_desc	prot_score	prot_mass	prot_matches	prot_matches_sig	prot_sequences	prot_sequences_sig	pep_query	pep_rank	pep_isbold	pep_isunique	pep_exp_mz	pep_exp_mr	pep_exp_z	pep_calc_mr	pep_delta	pep_miss	pep_score	pep_expect	pep_res_before	pep_seq	pep_res_after	pep_var_mod	pep_var_mod_pos	pep_summed_mod_pos	pep_scan_title
32	2::Q50341	sp|Q50341|MPN_142 Mgp-operon protein 3 Tax_Id=272634 [Mycoplasma pneumoniae (strain ATCC 29342 / M129)]	226	130378	3	2	3	2	359	1	1	1	706.909	1411.8	2	1411.73	0.0681	1	96.99	0.00012	R	KLQDSSFVDVFK	K				File: MPN Heparin2_46.wiff, Sample: 20130322 MPN Heparin2_46 (sample number 1), Elution: 39.789 min, Period: 1, Cycle(s): 7236 (Experiment 4)
32	2::Q50341	sp|Q50341|MPN_142 Mgp-operon protein 3 Tax_Id=272634 [Mycoplasma pneumoniae (strain ATCC 29342 / M129)]	226	130378	3	2	3	2	391	1	1	1	741.438	1480.86	2	1480.81	0.0485	1	51.01	4.2	K	KVDTLTTAVGSVYK	K				File: MPN Heparin2_46.wiff, Sample: 20130322 MPN Heparin2_46 (sample number 1), Elution: 34.782 to 35.195 min, Period: 1, Cycle(s): 7083 (Experiment 3), 7094 (Experiment 4)
32	2::Q50341	sp|Q50341|MPN_142 Mgp-operon protein 3 Tax_Id=272634 [Mycoplasma pneumoniae (strain ATCC 29342 / M129)]	226	130378	3	2	3	2	483	1	1	1	825.406	1648.8	2	1648.73	0.0725	0	84.2	0.0035	K	IEYLDGNFYGEDSK	I				File: MPN Heparin2_46.wiff, Sample: 20130322 MPN Heparin2_46 (sample number 1), Elution: 37.262 min, Period: 1, Cycle(s): 7169 (Experiment 2)
Found in gel mass range 0-11 kDa
Peak list data path	C:\Analyst Data\Projects\Mycoplasma\Michael\Pneumoniae\20130322\MPN Heparin2_47.wiff
Peak list format	Mascot generic
Search type	MIS
Mascot version	2.4.1
Database	1::contaminants 2::LudwigNR
Fasta file	1::contaminants_all_09092011.fasta 2::LudwigNR_Q113_generic_forward.fasta
Total sequences	19263279
Total residues	6990931504
Sequences after taxonomy filter	11991699
Number of queries	924
Warning	No taxonomy indexes for contaminants, taxonomy ~Bacteria (Eubacteria)~ ignored. Searching all entries in contaminants
Variable modifications	--------------------------------------------------------
Identifier	Name	Delta	Neutral loss(es)
1	Deamidated (NQ)	0.984016
2	Oxidation (M)	15.9949	0	63.9983
3	Propionamide (C)	71.0371
Search Parameters	--------------------------------------------------------
Taxonomy filter	. . Bacteria (Eubacteria)
Enzyme	semiTrypsin
Maximum Missed Cleavages	3
Fixed modifications
Variable modifications	Deamidated (NQ),Oxidation (M),Propionamide (C)
Peptide Mass Tolerance	100
Peptide Mass Tolerance Units	ppm
Fragment Mass Tolerance	0.2
Fragment Mass Tolerance Units	Da
Mass values	Monoisotopic
Instrument type	ESI-QUAD-TOF
Format parameters	--------------------------------------------------------
Significance threshold	0.05
Max. number of hits	0
Use MudPIT protein scoring	0
Ions score cut-off	0
Include same-set proteins	0
Include sub-set proteins	0
Include unassigned	0
Require bold red	1
Use homology threshold	0
Group protein families	0
Protein hits	--------------------------------------------------------
prot_hit_num	prot_acc	prot_desc	prot_score	prot_mass	prot_matches	prot_matches_sig	prot_sequences	prot_sequences_sig	pep_query	pep_rank	pep_isbold	pep_isunique	pep_exp_mz	pep_exp_mr	pep_exp_z	pep_calc_mr	pep_delta	pep_miss	pep_score	pep_expect	pep_res_before	pep_seq	pep_res_after	pep_var_mod	pep_var_mod_pos	pep_summed_mod_pos	pep_scan_title
34	2::H0PPY0	tr|H0PPY0|orf6 Cytadherence-related protein ORF6 Tax_Id=1112856 [Mycoplasma pneumoniae 309]	236	124480	4	2	4	2	461	1	1	1	706.899	1411.78	2	1411.73	0.0479	1	87.43	0.0012	R	KLQDSSFVDVFK	K				File: MPN Heparin2_47.wiff, Sample: 20130322 MPN Heparin2_47 (sample number 1), Elution: 38.618 min, Period: 1, Cycle(s): 6678 (Experiment 4)
34	2::H0PPY0	tr|H0PPY0|orf6 Cytadherence-related protein ORF6 Tax_Id=1112856 [Mycoplasma pneumoniae 309]	236	124480	4	2	4	2	513	1	1	1	741.444	1480.87	2	1480.81	0.0589	1	86.05	0.0012	K	KVDTLTTAVGSVYK	K				File: MPN Heparin2_47.wiff, Sample: 20130322 MPN Heparin2_47 (sample number 1), Elution: 32.843 min, Period: 1, Cycle(s): 6509 (Experiment 2)
34	2::H0PPY0	tr|H0PPY0|orf6 Cytadherence-related protein ORF6 Tax_Id=1112856 [Mycoplasma pneumoniae 309]	236	124480	4	2	4	2	688	1	1	1	889.47	1776.93	2	1776.86	0.0685	0	43.49	43	K	LNESWPVYEPLDSTK	N				File: MPN Heparin2_47.wiff, Sample: 20130322 MPN Heparin2_47 (sample number 1), Elution: 38.827 min, Period: 1, Cycle(s): 6683 (Experiment 3)
34	2::H0PPY0	tr|H0PPY0|orf6 Cytadherence-related protein ORF6 Tax_Id=1112856 [Mycoplasma pneumoniae 309]	236	124480	4	2	4	2	750	1	1	1	640.41	1918.21	3	1918.12	0.0937	0	27.44	430	K	APVKPAAPTAPRPPVQPPK	K				File: MPN Heparin2_47.wiff, Sample: 20130322 MPN Heparin2_47 (sample number 1), Elution: 27.659 min, Period: 1, Cycle(s): 6002 (Experiment 2)
Found in gel mass range 55-60 kDa
Peak list data path	C:\Analyst Data\Projects\Mycoplasma\Michael\Pneumoniae\20130322\MPN Heparin2_59.wiff
Peak list format	Mascot generic
Search type	MIS
Mascot version	2.4.1
Database	1::contaminants 2::LudwigNR
Fasta file	1::contaminants_all_09092011.fasta 2::LudwigNR_Q113_generic_forward.fasta
Total sequences	19263279
Total residues	6990931504
Sequences after taxonomy filter	11991699
Number of queries	897
Warning	No taxonomy indexes for contaminants, taxonomy ~Bacteria (Eubacteria)~ ignored. Searching all entries in contaminants
Variable modifications	--------------------------------------------------------
Identifier	Name	Delta	Neutral loss(es)
1	Deamidated (NQ)	0.984016
2	Oxidation (M)	15.9949	0	63.9983
3	Propionamide (C)	71.0371
Search Parameters	--------------------------------------------------------
Taxonomy filter	. . Bacteria (Eubacteria)
Enzyme	semiTrypsin
Maximum Missed Cleavages	3
Fixed modifications
Variable modifications	Deamidated (NQ),Oxidation (M),Propionamide (C)
Peptide Mass Tolerance	100
Peptide Mass Tolerance Units	ppm
Fragment Mass Tolerance	0.2
Fragment Mass Tolerance Units	Da
Mass values	Monoisotopic
Instrument type	ESI-QUAD-TOF
Format parameters	--------------------------------------------------------
Significance threshold	0.05
Max. number of hits	0
Use MudPIT protein scoring	0
Ions score cut-off	0
Include same-set proteins	0
Include sub-set proteins	0
Include unassigned	0
Require bold red	1
Use homology threshold	0
Group protein families	0
Protein hits	--------------------------------------------------------
prot_hit_num	prot_acc	prot_desc	prot_score	prot_mass	prot_matches	prot_matches_sig	prot_sequences	prot_sequences_sig	pep_query	pep_rank	pep_isbold	pep_isunique	pep_exp_mz	pep_exp_mr	pep_exp_z	pep_calc_mr	pep_delta	pep_miss	pep_score	pep_expect	pep_res_before	pep_seq	pep_res_after	pep_var_mod	pep_var_mod_pos	pep_summed_mod_pos	pep_scan_title
11	2::Q50341	sp|Q50341|MPN_142 Mgp-operon protein 3 Tax_Id=272634 [Mycoplasma pneumoniae (strain ATCC 29342 / M129)]	703	130378	9	6	9	6	305	1	1	1	645.883	1289.75	2	1289.67	0.0777	0	100.01	5.7e-05	R	VDFAANSVLQAR	N				File: MPN Heparin2_59.wiff, Sample: 20130322 MPN Heparin2_59 (sample number 1), Elution: 34.121 min, Period: 1, Cycle(s): 6508 (Experiment 3)
11	2::Q50341	sp|Q50341|MPN_142 Mgp-operon protein 3 Tax_Id=272634 [Mycoplasma pneumoniae (strain ATCC 29342 / M129)]	703	130378	9	6	9	6	441	2	1	1	727.434	1452.85	2	1452.82	0.0328	0	39.46	55	R	GHKPNYSAVLLVR	G				File: MPN Heparin2_59.wiff, Sample: 20130322 MPN Heparin2_59 (sample number 1), Elution: 33.598 min, Period: 1, Cycle(s): 6492 (Experiment 3)
11	2::Q50341	sp|Q50341|MPN_142 Mgp-operon protein 3 Tax_Id=272634 [Mycoplasma pneumoniae (strain ATCC 29342 / M129)]	703	130378	9	6	9	6	561	1	1	1	805.499	1608.98	2	1608.91	0.0748	2	113.52	1.6e-06	K	KVDTLTTAVGSVYKK	I				File: MPN Heparin2_59.wiff, Sample: 20130322 MPN Heparin2_59 (sample number 1), Elution: 31.695 min, Period: 1, Cycle(s): 6397 (Experiment 2)
11	2::Q50341	sp|Q50341|MPN_142 Mgp-operon protein 3 Tax_Id=272634 [Mycoplasma pneumoniae (strain ATCC 29342 / M129)]	703	130378	9	6	9	6	587	1	1	1	825.412	1648.81	2	1648.73	0.0834	0	90.82	0.00076	K	IEYLDGNFYGEDSK	I				File: MPN Heparin2_59.wiff, Sample: 20130322 MPN Heparin2_59 (sample number 1), Elution: 35.279 min, Period: 1, Cycle(s): 6536 (Experiment 3)
11	2::Q50341	sp|Q50341|MPN_142 Mgp-operon protein 3 Tax_Id=272634 [Mycoplasma pneumoniae (strain ATCC 29342 / M129)]	703	130378	9	6	9	6	688	1	1	1	911.017	1820.02	2	1819.96	0.0636	0	60.36	0.76	R	TDQLLVYGIVNESELK	S				File: MPN Heparin2_59.wiff, Sample: 20130322 MPN Heparin2_59 (sample number 1), Elution: 40.12 min, Period: 1, Cycle(s): 6674 (Experiment 3)
11	2::Q50341	sp|Q50341|MPN_142 Mgp-operon protein 3 Tax_Id=272634 [Mycoplasma pneumoniae (strain ATCC 29342 / M129)]	703	130378	9	6	9	6	723	1	1	1	640.417	1918.23	3	1918.12	0.1153	0	39.61	17	K	APVKPAAPTAPRPPVQPPK	K				File: MPN Heparin2_59.wiff, Sample: 20130322 MPN Heparin2_59 (sample number 1), Elution: 27.585 min, Period: 1, Cycle(s): 5935 (Experiment 2)
11	2::Q50341	sp|Q50341|MPN_142 Mgp-operon protein 3 Tax_Id=272634 [Mycoplasma pneumoniae (strain ATCC 29342 / M129)]	703	130378	9	6	9	6	735	1	1	1	976.506	1951	2	1950.92	0.0796	1	103.96	4.1e-05	K	NTNGLFEKDDQLSENVK	R	Deamidated (NQ)	0.00100000000000000.0		File: MPN Heparin2_59.wiff, Sample: 20130322 MPN Heparin2_59 (sample number 1), Elution: 31.842 min, Period: 1, Cycle(s): 6412 (Experiment 2)
11	2::Q50341	sp|Q50341|MPN_142 Mgp-operon protein 3 Tax_Id=272634 [Mycoplasma pneumoniae (strain ATCC 29342 / M129)]	703	130378	9	6	9	6	848	1	1	1	828.799	2483.38	3	2483.25	0.1215	0	87.99	0.0017	K	ISTLESQATDGFANSLLNFGTGLK	A				File: MPN Heparin2_59.wiff, Sample: 20130322 MPN Heparin2_59 (sample number 1), Elution: 41.243 min, Period: 1, Cycle(s): 6718 (Experiment 2)
11	2::Q50341	sp|Q50341|MPN_142 Mgp-operon protein 3 Tax_Id=272634 [Mycoplasma pneumoniae (strain ATCC 29342 / M129)]	703	130378	9	6	9	6	858	1	1	1	850.818	2549.43	3	2549.3	0.1309	1	87.1	0.002	R	NLTDKTVDEVINNPDILQSFFK	F				File: MPN Heparin2_59.wiff, Sample: 20130322 MPN Heparin2_59 (sample number 1), Elution: 41.543 min, Period: 1, Cycle(s): 6727 (Experiment 4)
Found in gel mass range 38-48 kDa
Peak list data path	C:\Analyst Data\Projects\Mycoplasma\Michael\Pneumoniae\20130322\MPN Heparin2_61.wiff
Peak list format	Mascot generic
Search type	MIS
Mascot version	2.4.1
Database	1::contaminants 2::LudwigNR
Fasta file	1::contaminants_all_09092011.fasta 2::LudwigNR_Q113_generic_forward.fasta
Total sequences	19263279
Total residues	6990931504
Sequences after taxonomy filter	11991699
Number of queries	1028
Warning	No taxonomy indexes for contaminants, taxonomy ~Bacteria (Eubacteria)~ ignored. Searching all entries in contaminants
Variable modifications	--------------------------------------------------------
Identifier	Name	Delta	Neutral loss(es)
1	Deamidated (NQ)	0.984016
2	Oxidation (M)	15.9949	0	63.9983
3	Propionamide (C)	71.0371
Search Parameters	--------------------------------------------------------
Taxonomy filter	. . Bacteria (Eubacteria)
Enzyme	semiTrypsin
Maximum Missed Cleavages	3
Fixed modifications
Variable modifications	Deamidated (NQ),Oxidation (M),Propionamide (C)
Peptide Mass Tolerance	100
Peptide Mass Tolerance Units	ppm
Fragment Mass Tolerance	0.2
Fragment Mass Tolerance Units	Da
Mass values	Monoisotopic
Instrument type	ESI-QUAD-TOF
Format parameters	--------------------------------------------------------
Significance threshold	0.05
Max. number of hits	0
Use MudPIT protein scoring	0
Ions score cut-off	0
Include same-set proteins	0
Include sub-set proteins	0
Include unassigned	0
Require bold red	1
Use homology threshold	0
Group protein families	0
Protein hits	--------------------------------------------------------
prot_hit_num	prot_acc	prot_desc	prot_score	prot_mass	prot_matches	prot_matches_sig	prot_sequences	prot_sequences_sig	pep_query	pep_rank	pep_isbold	pep_isunique	pep_exp_mz	pep_exp_mr	pep_exp_z	pep_calc_mr	pep_delta	pep_miss	pep_score	pep_expect	pep_res_before	pep_seq	pep_res_after	pep_var_mod	pep_var_mod_pos	pep_summed_mod_pos	pep_scan_title
54	2::Q50341	sp|Q50341|MPN_142 Mgp-operon protein 3 Tax_Id=272634 [Mycoplasma pneumoniae (strain ATCC 29342 / M129)]	166	130378	3	1	3	1	412	2	1	1	727.444	1452.87	2	1452.82	0.0532	0	34.74	140	R	GHKPNYSAVLLVR	G				File: MPN Heparin2_61.wiff, Sample: 20130322 MPN Heparin2_61 (sample number 1), Elution: 33.713 min, Period: 1, Cycle(s): 6561 (Experiment 3)
54	2::Q50341	sp|Q50341|MPN_142 Mgp-operon protein 3 Tax_Id=272634 [Mycoplasma pneumoniae (strain ATCC 29342 / M129)]	166	130378	3	1	3	1	699	1	1	1	911.015	1820.01	2	1819.96	0.0579	0	76.33	0.02	R	TDQLLVYGIVNESELK	S				File: MPN Heparin2_61.wiff, Sample: 20130322 MPN Heparin2_61 (sample number 1), Elution: 40.639 min, Period: 1, Cycle(s): 6774 (Experiment 3)
54	2::Q50341	sp|Q50341|MPN_142 Mgp-operon protein 3 Tax_Id=272634 [Mycoplasma pneumoniae (strain ATCC 29342 / M129)]	166	130378	3	1	3	1	926	1	1	1	828.791	2483.35	3	2483.25	0.097	0	61.16	0.87	K	ISTLESQATDGFANSLLNFGTGLK	A				File: MPN Heparin2_61.wiff, Sample: 20130322 MPN Heparin2_61 (sample number 1), Elution: 41.861 min, Period: 1, Cycle(s): 6826 (Experiment 3)
Found in gel mass range 27-32 kDa
Peak list data path	C:\Analyst Data\Projects\Mycoplasma\Michael\Pneumoniae\20130322\MPN Heparin2_63.wiff
Peak list format	Mascot generic
Search type	MIS
Mascot version	2.4.1
Database	1::contaminants 2::LudwigNR
Fasta file	1::contaminants_all_09092011.fasta 2::LudwigNR_Q113_generic_forward.fasta
Total sequences	19263279
Total residues	6990931504
Sequences after taxonomy filter	11991699
Number of queries	918
Warning	No taxonomy indexes for contaminants, taxonomy ~Bacteria (Eubacteria)~ ignored. Searching all entries in contaminants
Variable modifications	--------------------------------------------------------
Identifier	Name	Delta	Neutral loss(es)
1	Deamidated (NQ)	0.984016
2	Oxidation (M)	15.9949	0	63.9983
3	Propionamide (C)	71.0371
Search Parameters	--------------------------------------------------------
Taxonomy filter	. . Bacteria (Eubacteria)
Enzyme	semiTrypsin
Maximum Missed Cleavages	3
Fixed modifications
Variable modifications	Deamidated (NQ),Oxidation (M),Propionamide (C)
Peptide Mass Tolerance	100
Peptide Mass Tolerance Units	ppm
Fragment Mass Tolerance	0.2
Fragment Mass Tolerance Units	Da
Mass values	Monoisotopic
Instrument type	ESI-QUAD-TOF
Format parameters	--------------------------------------------------------
Significance threshold	0.05
Max. number of hits	0
Use MudPIT protein scoring	0
Ions score cut-off	0
Include same-set proteins	0
Include sub-set proteins	0
Include unassigned	0
Require bold red	1
Use homology threshold	0
Group protein families	0
Protein hits	--------------------------------------------------------
prot_hit_num	prot_acc	prot_desc	prot_score	prot_mass	prot_matches	prot_matches_sig	prot_sequences	prot_sequences_sig	pep_query	pep_rank	pep_isbold	pep_isunique	pep_exp_mz	pep_exp_mr	pep_exp_z	pep_calc_mr	pep_delta	pep_miss	pep_score	pep_expect	pep_res_before	pep_seq	pep_res_after	pep_var_mod	pep_var_mod_pos	pep_summed_mod_pos	pep_scan_title
71	2::E1QBR0	tr|E1QBR0|mgpC_3 MgpC protein Tax_Id=722438 [Mycoplasma pneumoniae (strain ATCC 15531 / NBRC 14401 / NCTC 10119 / FH)]	105	124466	2	0	2	0	617	1	1	1	889.47	1776.93	2	1776.86	0.0685	0	61.96	0.61	K	LNESWPVYEPLDSTK	N				File: MPN Heparin2_63.wiff, Sample: 20130322 MPN Heparin2_63 (sample number 1), Elution: 39.074 min, Period: 1, Cycle(s): 6774 (Experiment 4)
71	2::E1QBR0	tr|E1QBR0|mgpC_3 MgpC protein Tax_Id=722438 [Mycoplasma pneumoniae (strain ATCC 15531 / NBRC 14401 / NCTC 10119 / FH)]	105	124466	2	0	2	0	821	1	1	1	799.464	2395.37	3	2395.27	0.096	0	47.03	18	K	TLQDLLVEQPVTPYTPNAGLAR	V				File: MPN Heparin2_63.wiff, Sample: 20130322 MPN Heparin2_63 (sample number 1), Elution: 40.534 min, Period: 1, Cycle(s): 6832 (Experiment 3)
Found in gel mass range 23-28 kDa
Peak list data path	C:\Analyst Data\Projects\Mycoplasma\Michael\Pneumoniae\20130322\MPN Heparin2_64.wiff
Peak list format	Mascot generic
Search type	MIS
Mascot version	2.4.1
Database	1::contaminants 2::LudwigNR
Fasta file	1::contaminants_all_09092011.fasta 2::LudwigNR_Q113_generic_forward.fasta
Total sequences	19263279
Total residues	6990931504
Sequences after taxonomy filter	11991699
Number of queries	931
Warning	No taxonomy indexes for contaminants, taxonomy ~Bacteria (Eubacteria)~ ignored. Searching all entries in contaminants
Variable modifications	--------------------------------------------------------
Identifier	Name	Delta	Neutral loss(es)
1	Deamidated (NQ)	0.984016
2	Oxidation (M)	15.9949	0	63.9983
3	Propionamide (C)	71.0371
Search Parameters	--------------------------------------------------------
Taxonomy filter	. . Bacteria (Eubacteria)
Enzyme	semiTrypsin
Maximum Missed Cleavages	3
Fixed modifications
Variable modifications	Deamidated (NQ),Oxidation (M),Propionamide (C)
Peptide Mass Tolerance	100
Peptide Mass Tolerance Units	ppm
Fragment Mass Tolerance	0.2
Fragment Mass Tolerance Units	Da
Mass values	Monoisotopic
Instrument type	ESI-QUAD-TOF
Format parameters	--------------------------------------------------------
Significance threshold	0.05
Max. number of hits	0
Use MudPIT protein scoring	0
Ions score cut-off	0
Include same-set proteins	0
Include sub-set proteins	0
Include unassigned	0
Require bold red	1
Use homology threshold	0
Group protein families	0
Protein hits	--------------------------------------------------------
prot_hit_num	prot_acc	prot_desc	prot_score	prot_mass	prot_matches	prot_matches_sig	prot_sequences	prot_sequences_sig	pep_query	pep_rank	pep_isbold	pep_isunique	pep_exp_mz	pep_exp_mr	pep_exp_z	pep_calc_mr	pep_delta	pep_miss	pep_score	pep_expect	pep_res_before	pep_seq	pep_res_after	pep_var_mod	pep_var_mod_pos	pep_summed_mod_pos	pep_scan_title
16	2::Q50341	sp|Q50341|MPN_142 Mgp-operon protein 3 Tax_Id=272634 [Mycoplasma pneumoniae (strain ATCC 29342 / M129)]	580	130378	10	1	10	1	285	1	1	1	645.861	1289.71	2	1289.67	0.0344	0	68	0.12	R	VDFAANSVLQAR	N				File: MPN Heparin2_64.wiff, Sample: 20130322 MPN Heparin2_64 (sample number 1), Elution: 35.395 min, Period: 1, Cycle(s): 6853 (Experiment 3)
16	2::Q50341	sp|Q50341|MPN_142 Mgp-operon protein 3 Tax_Id=272634 [Mycoplasma pneumoniae (strain ATCC 29342 / M129)]	580	130378	10	1	10	1	389	1	1	1	706.909	1411.8	2	1411.73	0.0681	1	67.84	0.1	R	KLQDSSFVDVFK	K				File: MPN Heparin2_64.wiff, Sample: 20130322 MPN Heparin2_64 (sample number 1), Elution: 39.311 min, Period: 1, Cycle(s): 6962 (Experiment 2)
16	2::Q50341	sp|Q50341|MPN_142 Mgp-operon protein 3 Tax_Id=272634 [Mycoplasma pneumoniae (strain ATCC 29342 / M129)]	580	130378	10	1	10	1	553	1	1	1	825.409	1648.8	2	1648.73	0.078	0	77.18	0.017	K	IEYLDGNFYGEDSK	I				File: MPN Heparin2_64.wiff, Sample: 20130322 MPN Heparin2_64 (sample number 1), Elution: 36.396 min, Period: 1, Cycle(s): 6880 (Experiment 3)
16	2::Q50341	sp|Q50341|MPN_142 Mgp-operon protein 3 Tax_Id=272634 [Mycoplasma pneumoniae (strain ATCC 29342 / M129)]	580	130378	10	1	10	1	564	1	1	1	833.456	1664.9	2	1664.83	0.0663	0	60.63	0.74	R	AAHLHPSYELVDWK	R				File: MPN Heparin2_64.wiff, Sample: 20130322 MPN Heparin2_64 (sample number 1), Elution: 37.24 min, Period: 1, Cycle(s): 6905 (Experiment 4)
16	2::Q50341	sp|Q50341|MPN_142 Mgp-operon protein 3 Tax_Id=272634 [Mycoplasma pneumoniae (strain ATCC 29342 / M129)]	580	130378	10	1	10	1	623	1	1	1	889.476	1776.94	2	1776.86	0.0798	0	42.78	50	K	LNESWPVYEPLDSTK	E				File: MPN Heparin2_64.wiff, Sample: 20130322 MPN Heparin2_64 (sample number 1), Elution: 39.307 min, Period: 1, Cycle(s): 6961 (Experiment 4)
16	2::Q50341	sp|Q50341|MPN_142 Mgp-operon protein 3 Tax_Id=272634 [Mycoplasma pneumoniae (strain ATCC 29342 / M129)]	580	130378	10	1	10	1	649	1	1	1	911.512	1821.01	2	1820.93	0.0771	1	60.51	0.76	R	AAHLHPSYELVDWKR	V				File: MPN Heparin2_64.wiff, Sample: 20130322 MPN Heparin2_64 (sample number 1), Elution: 35.611 min, Period: 1, Cycle(s): 6857 (Experiment 4)
16	2::Q50341	sp|Q50341|MPN_142 Mgp-operon protein 3 Tax_Id=272634 [Mycoplasma pneumoniae (strain ATCC 29342 / M129)]	580	130378	10	1	10	1	694	1	1	1	953.52	1905.03	2	1904.95	0.0736	1	54.21	3.7	R	KLNESWPVYEPLDSTK	E				File: MPN Heparin2_64.wiff, Sample: 20130322 MPN Heparin2_64 (sample number 1), Elution: 38.588 min, Period: 1, Cycle(s): 6938 (Experiment 2)
16	2::Q50341	sp|Q50341|MPN_142 Mgp-operon protein 3 Tax_Id=272634 [Mycoplasma pneumoniae (strain ATCC 29342 / M129)]	580	130378	10	1	10	1	699	1	1	1	640.417	1918.23	3	1918.12	0.1153	0	34.71	54	K	APVKPAAPTAPRPPVQPPK	K				File: MPN Heparin2_64.wiff, Sample: 20130322 MPN Heparin2_64 (sample number 1), Elution: 29.348 min, Period: 1, Cycle(s): 6303 (Experiment 2)
16	2::Q50341	sp|Q50341|MPN_142 Mgp-operon protein 3 Tax_Id=272634 [Mycoplasma pneumoniae (strain ATCC 29342 / M129)]	580	130378	10	1	10	1	855	1	1	1	831.082	2490.22	3	2490.12	0.109	0	68.86	0.16	R	VNGVAQDTVHFGSGQESSWNSQR	S	Deamidated (NQ)	0.01000000000000000000000.0		File: MPN Heparin2_64.wiff, Sample: 20130322 MPN Heparin2_64 (sample number 1), Elution: 33.406 min, Period: 1, Cycle(s): 6792 (Experiment 2)
16	2::Q50341	sp|Q50341|MPN_142 Mgp-operon protein 3 Tax_Id=272634 [Mycoplasma pneumoniae (strain ATCC 29342 / M129)]	580	130378	10	1	10	1	903	1	1	1	956.818	2867.43	3	2867.31	0.1222	0	70.63	0.11	K	ALNGSQSGSSDTSGSNSQDFASYVLIFK	A	Deamidated (NQ)	0.0010000000000000000000000000.0		File: MPN Heparin2_64.wiff, Sample: 20130322 MPN Heparin2_64 (sample number 1), Elution: 41.339 min, Period: 1, Cycle(s): 7043 (Experiment 4)
Found in gel mass range 11-15 kDa
Peak list data path	C:\Analyst Data\Projects\Mycoplasma\Michael\Pneumoniae\20130322\MPN Heparin2_67.wiff
Peak list format	Mascot generic
Search type	MIS
Mascot version	2.4.1
Database	1::contaminants 2::LudwigNR
Fasta file	1::contaminants_all_09092011.fasta 2::LudwigNR_Q113_generic_forward.fasta
Total sequences	19263279
Total residues	6990931504
Sequences after taxonomy filter	11991699
Number of queries	790
Warning	No taxonomy indexes for contaminants, taxonomy ~Bacteria (Eubacteria)~ ignored. Searching all entries in contaminants
Variable modifications	--------------------------------------------------------
Identifier	Name	Delta	Neutral loss(es)
1	Deamidated (NQ)	0.984016
2	Oxidation (M)	15.9949	0	63.9983
3	Propionamide (C)	71.0371
Search Parameters	--------------------------------------------------------
Taxonomy filter	. . Bacteria (Eubacteria)
Enzyme	semiTrypsin
Maximum Missed Cleavages	3
Fixed modifications
Variable modifications	Deamidated (NQ),Oxidation (M),Propionamide (C)
Peptide Mass Tolerance	100
Peptide Mass Tolerance Units	ppm
Fragment Mass Tolerance	0.2
Fragment Mass Tolerance Units	Da
Mass values	Monoisotopic
Instrument type	ESI-QUAD-TOF
Format parameters	--------------------------------------------------------
Significance threshold	0.05
Max. number of hits	0
Use MudPIT protein scoring	0
Ions score cut-off	0
Include same-set proteins	0
Include sub-set proteins	0
Include unassigned	0
Require bold red	1
Use homology threshold	0
Group protein families	0
Protein hits	--------------------------------------------------------
prot_hit_num	prot_acc	prot_desc	prot_score	prot_mass	prot_matches	prot_matches_sig	prot_sequences	prot_sequences_sig	pep_query	pep_rank	pep_isbold	pep_isunique	pep_exp_mz	pep_exp_mr	pep_exp_z	pep_calc_mr	pep_delta	pep_miss	pep_score	pep_expect	pep_res_before	pep_seq	pep_res_after	pep_var_mod	pep_var_mod_pos	pep_summed_mod_pos	pep_scan_title
5	2::H0PPY0	tr|H0PPY0|orf6 Cytadherence-related protein ORF6 Tax_Id=1112856 [Mycoplasma pneumoniae 309]	498	124480	7	4	7	4	293	1	1	1	642.859	1283.7	2	1283.64	0.0636	0	80.1	0.0063	K	LQDSSFVDVFK	K				File: MPN Heparin2_67.wiff, Sample: 20130323 MPN Heparin2_67 (sample number 1), Elution: 38.697 min, Period: 1, Cycle(s): 6625 (Experiment 4)
5	2::H0PPY0	tr|H0PPY0|orf6 Cytadherence-related protein ORF6 Tax_Id=1112856 [Mycoplasma pneumoniae 309]	498	124480	7	4	7	4	392	1	1	1	706.906	1411.8	2	1411.73	0.063	1	66.21	0.15	K	LQDSSFVDVFKK	V				File: MPN Heparin2_67.wiff, Sample: 20130323 MPN Heparin2_67 (sample number 1), Elution: 36.348 min, Period: 1, Cycle(s): 6567 (Experiment 3)
5	2::H0PPY0	tr|H0PPY0|orf6 Cytadherence-related protein ORF6 Tax_Id=1112856 [Mycoplasma pneumoniae 309]	498	124480	7	4	7	4	445	1	1	1	741.441	1480.87	2	1480.81	0.0537	1	84.22	0.0019	K	KVDTLTTAVGSVYK	K				File: MPN Heparin2_67.wiff, Sample: 20130323 MPN Heparin2_67 (sample number 1), Elution: 31.524 min, Period: 1, Cycle(s): 6347 (Experiment 2)
5	2::H0PPY0	tr|H0PPY0|orf6 Cytadherence-related protein ORF6 Tax_Id=1112856 [Mycoplasma pneumoniae 309]	498	124480	7	4	7	4	480	1	1	1	770.96	1539.91	2	1539.83	0.0757	2	94.22	0.0002	R	KLQDSSFVDVFKK	V				File: MPN Heparin2_67.wiff, Sample: 20130323 MPN Heparin2_67 (sample number 1), Elution: 35.357 min, Period: 1, Cycle(s): 6542 (Experiment 4)
5	2::H0PPY0	tr|H0PPY0|orf6 Cytadherence-related protein ORF6 Tax_Id=1112856 [Mycoplasma pneumoniae 309]	498	124480	7	4	7	4	512	1	1	1	805.496	1608.98	2	1608.91	0.0695	2	116.67	8.2e-07	K	KVDTLTTAVGSVYKK	I				File: MPN Heparin2_67.wiff, Sample: 20130323 MPN Heparin2_67 (sample number 1), Elution: 30.414 min, Period: 1, Cycle(s): 6235 (Experiment 3)
5	2::H0PPY0	tr|H0PPY0|orf6 Cytadherence-related protein ORF6 Tax_Id=1112856 [Mycoplasma pneumoniae 309]	498	124480	7	4	7	4	613	1	1	1	889.47	1776.93	2	1776.86	0.0685	0	29.72	1000	K	LNESWPVYEPLDSTK	N				File: MPN Heparin2_67.wiff, Sample: 20130323 MPN Heparin2_67 (sample number 1), Elution: 37.843 min, Period: 1, Cycle(s): 6607 (Experiment 4)
5	2::H0PPY0	tr|H0PPY0|orf6 Cytadherence-related protein ORF6 Tax_Id=1112856 [Mycoplasma pneumoniae 309]	498	124480	7	4	7	4	668	1	1	1	640.415	1918.22	3	1918.12	0.1081	0	41	14	K	APVKPAAPTAPRPPVQPPK	K				File: MPN Heparin2_67.wiff, Sample: 20130323 MPN Heparin2_67 (sample number 1), Elution: 26.102 min, Period: 1, Cycle(s): 5667 (Experiment 2)
Found in gel mass range 34-45 kDa
Peak list data path	C:\Analyst Data\Projects\Mycoplasma\Michael\Pneumoniae\20130322\MPNHeparin2_72.wiff
Peak list format	Mascot generic
Search type	MIS
Mascot version	2.4.1
Database	1::contaminants 2::LudwigNR
Fasta file	1::contaminants_all_09092011.fasta 2::LudwigNR_Q113_generic_forward.fasta
Total sequences	19263279
Total residues	6990931504
Sequences after taxonomy filter	11991699
Number of queries	875
Warning	No taxonomy indexes for contaminants, taxonomy ~Bacteria (Eubacteria)~ ignored. Searching all entries in contaminants
Variable modifications	--------------------------------------------------------
Identifier	Name	Delta	Neutral loss(es)
1	Deamidated (NQ)	0.984016
2	Oxidation (M)	15.9949	0	63.9983
3	Propionamide (C)	71.0371
Search Parameters	--------------------------------------------------------
Taxonomy filter	. . Bacteria (Eubacteria)
Enzyme	semiTrypsin
Maximum Missed Cleavages	3
Fixed modifications
Variable modifications	Deamidated (NQ),Oxidation (M),Propionamide (C)
Peptide Mass Tolerance	100
Peptide Mass Tolerance Units	ppm
Fragment Mass Tolerance	0.2
Fragment Mass Tolerance Units	Da
Mass values	Monoisotopic
Instrument type	ESI-QUAD-TOF
Format parameters	--------------------------------------------------------
Significance threshold	0.05
Max. number of hits	0
Use MudPIT protein scoring	0
Ions score cut-off	0
Include same-set proteins	0
Include sub-set proteins	0
Include unassigned	0
Require bold red	1
Use homology threshold	0
Group protein families	0
Protein hits	--------------------------------------------------------
prot_hit_num	prot_acc	prot_desc	prot_score	prot_mass	prot_matches	prot_matches_sig	prot_sequences	prot_sequences_sig	pep_query	pep_rank	pep_isbold	pep_isunique	pep_exp_mz	pep_exp_mr	pep_exp_z	pep_calc_mr	pep_delta	pep_miss	pep_score	pep_expect	pep_res_before	pep_seq	pep_res_after	pep_var_mod	pep_var_mod_pos	pep_summed_mod_pos	pep_scan_title
31	2::Q50341	sp|Q50341|MPN_142 Mgp-operon protein 3 Tax_Id=272634 [Mycoplasma pneumoniae (strain ATCC 29342 / M129)]	327	130378	4	3	4	3	313	1	1	1	645.88	1289.75	2	1289.67	0.0729	0	99.87	6.2e-05	R	VDFAANSVLQAR	N				File: MPNHeparin2_72.wiff, Sample: 20130324 MPNHeparin2_72 (sample number 1), Elution: 36.492 min, Period: 1, Cycle(s): 7057 (Experiment 4)
31	2::Q50341	sp|Q50341|MPN_142 Mgp-operon protein 3 Tax_Id=272634 [Mycoplasma pneumoniae (strain ATCC 29342 / M129)]	327	130378	4	3	4	3	441	1	1	1	727.459	1452.9	2	1452.82	0.0839	0	55.17	0.82	R	GHKPNYSAVLLVR	G				File: MPNHeparin2_72.wiff, Sample: 20130324 MPNHeparin2_72 (sample number 1), Elution: 38.944 min, Period: 1, Cycle(s): 7119 (Experiment 2)
31	2::Q50341	sp|Q50341|MPN_142 Mgp-operon protein 3 Tax_Id=272634 [Mycoplasma pneumoniae (strain ATCC 29342 / M129)]	327	130378	4	3	4	3	832	1	1	1	828.797	2483.37	3	2483.25	0.1133	0	83.42	0.005	K	ISTLESQATDGFANSLLNFGTGLK	A				File: MPNHeparin2_72.wiff, Sample: 20130324 MPNHeparin2_72 (sample number 1), Elution: 42.432 min, Period: 1, Cycle(s): 7256 (Experiment 3)
31	2::Q50341	sp|Q50341|MPN_142 Mgp-operon protein 3 Tax_Id=272634 [Mycoplasma pneumoniae (strain ATCC 29342 / M129)]	327	130378	4	3	4	3	841	1	1	1	850.81	2549.41	3	2549.3	0.106	1	97.44	0.0002	R	NLTDKTVDEVINNPDILQSFFK	F				File: MPNHeparin2_72.wiff, Sample: 20130324 MPNHeparin2_72 (sample number 1), Elution: 42.384 min, Period: 1, Cycle(s): 7254 (Experiment 3)
Found in gel mass range 18-34 kDa
Peak list data path	C:\Analyst Data\Projects\Mycoplasma\Michael\Pneumoniae\20130322\MPNHeparin2_73.wiff
Peak list format	Mascot generic
Search type	MIS
Mascot version	2.4.1
Database	1::contaminants 2::LudwigNR
Fasta file	1::contaminants_all_09092011.fasta 2::LudwigNR_Q113_generic_forward.fasta
Total sequences	19263279
Total residues	6990931504
Sequences after taxonomy filter	11991699
Number of queries	810
Warning	No taxonomy indexes for contaminants, taxonomy ~Bacteria (Eubacteria)~ ignored. Searching all entries in contaminants
Variable modifications	--------------------------------------------------------
Identifier	Name	Delta	Neutral loss(es)
1	Deamidated (NQ)	0.984016
2	Oxidation (M)	15.9949	0	63.9983
3	Propionamide (C)	71.0371
Search Parameters	--------------------------------------------------------
Taxonomy filter	. . Bacteria (Eubacteria)
Enzyme	semiTrypsin
Maximum Missed Cleavages	3
Fixed modifications
Variable modifications	Deamidated (NQ),Oxidation (M),Propionamide (C)
Peptide Mass Tolerance	100
Peptide Mass Tolerance Units	ppm
Fragment Mass Tolerance	0.2
Fragment Mass Tolerance Units	Da
Mass values	Monoisotopic
Instrument type	ESI-QUAD-TOF
Format parameters	--------------------------------------------------------
Significance threshold	0.05
Max. number of hits	0
Use MudPIT protein scoring	0
Ions score cut-off	0
Include same-set proteins	0
Include sub-set proteins	0
Include unassigned	0
Require bold red	1
Use homology threshold	0
Group protein families	0
Protein hits	--------------------------------------------------------
prot_hit_num	prot_acc	prot_desc	prot_score	prot_mass	prot_matches	prot_matches_sig	prot_sequences	prot_sequences_sig	pep_query	pep_rank	pep_isbold	pep_isunique	pep_exp_mz	pep_exp_mr	pep_exp_z	pep_calc_mr	pep_delta	pep_miss	pep_score	pep_expect	pep_res_before	pep_seq	pep_res_after	pep_var_mod	pep_var_mod_pos	pep_summed_mod_pos	pep_scan_title
16	2::E1QBR0	tr|E1QBR0|mgpC_3 MgpC protein Tax_Id=722438 [Mycoplasma pneumoniae (strain ATCC 15531 / NBRC 14401 / NCTC 10119 / FH)]	455	124466	6	3	6	3	310	1	1	1	645.885	1289.76	2	1289.67	0.0825	0	119.78	5.8e-07	R	VDFAANSVLQAR	N				File: MPNHeparin2_73.wiff, Sample: 20130324 MPNHeparin2_73 (sample number 1), Elution: 36.741 min, Period: 1, Cycle(s): 7133 (Experiment 4)
16	2::E1QBR0	tr|E1QBR0|mgpC_3 MgpC protein Tax_Id=722438 [Mycoplasma pneumoniae (strain ATCC 15531 / NBRC 14401 / NCTC 10119 / FH)]	455	124466	6	3	6	3	451	1	1	1	741.446	1480.88	2	1480.81	0.064	1	98.26	6.9e-05	K	KVDTLTTAVGSVYK	K				File: MPNHeparin2_73.wiff, Sample: 20130324 MPNHeparin2_73 (sample number 1), Elution: 36.437 min, Period: 1, Cycle(s): 7122 (Experiment 3)
16	2::E1QBR0	tr|E1QBR0|mgpC_3 MgpC protein Tax_Id=722438 [Mycoplasma pneumoniae (strain ATCC 15531 / NBRC 14401 / NCTC 10119 / FH)]	455	124466	6	3	6	3	555	1	1	1	825.406	1648.8	2	1648.73	0.0725	0	61.06	0.71	K	IEYLDGNFYGEDSK	I				File: MPNHeparin2_73.wiff, Sample: 20130324 MPNHeparin2_73 (sample number 1), Elution: 37.373 min, Period: 1, Cycle(s): 7147 (Experiment 4)
16	2::E1QBR0	tr|E1QBR0|mgpC_3 MgpC protein Tax_Id=722438 [Mycoplasma pneumoniae (strain ATCC 15531 / NBRC 14401 / NCTC 10119 / FH)]	455	124466	6	3	6	3	646	1	1	1	911.015	1820.01	2	1819.96	0.0579	0	81.8	0.0056	R	TDQLLVYGIVNESELK	S				File: MPNHeparin2_73.wiff, Sample: 20130324 MPNHeparin2_73 (sample number 1), Elution: 41.198 min, Period: 1, Cycle(s): 7267 (Experiment 4)
16	2::E1QBR0	tr|E1QBR0|mgpC_3 MgpC protein Tax_Id=722438 [Mycoplasma pneumoniae (strain ATCC 15531 / NBRC 14401 / NCTC 10119 / FH)]	455	124466	6	3	6	3	782	1	1	1	799.47	2395.39	3	2395.27	0.1121	0	32.16	500	K	TLQDLLVEQPVTPYTPNAGLAR	V				File: MPNHeparin2_73.wiff, Sample: 20130324 MPNHeparin2_73 (sample number 1), Elution: 40.992 min, Period: 1, Cycle(s): 7260 (Experiment 2)
16	2::E1QBR0	tr|E1QBR0|mgpC_3 MgpC protein Tax_Id=722438 [Mycoplasma pneumoniae (strain ATCC 15531 / NBRC 14401 / NCTC 10119 / FH)]	455	124466	6	3	6	3	802	1	1	1	956.824	2867.45	3	2867.31	0.1397	0	73.43	0.06	K	ALNGSQSGSSDTSGSNSQDFASYVLIFK	A	Deamidated (NQ)	0.0000010000000000000000000000.0		File: MPNHeparin2_73.wiff, Sample: 20130324 MPNHeparin2_73 (sample number 1), Elution: 41.608 min, Period: 1, Cycle(s): 7283 (Experiment 4)

## Sheet: Plasminogen
Found in gel mass range 40-48 kDa
Also Scores 98 against Q50341
Peak list data path	C:\Analyst Data\Projects\Mpn\20140511 PLG MPN\MPNplg_7.wiff
Peak list format	Mascot generic
Search type	MIS
Mascot version	2.4.1
Database	1::contaminants 2::MSPnr100
Fasta file	1::contaminants_all_10062014.fasta 2::MSPnr100_Q215.fasta
Total sequences	68277407
Total residues	24208969539
Sequences after taxonomy filter	102795
Number of queries	848
Warning	No taxonomy indexes for contaminants, taxonomy ~Mycoplasma~ ignored. Searching all entries in contaminants
Variable modifications	--------------------------------------------------------
Identifier	Name	Delta	Neutral loss(es)
1	Deamidated (NQ)	0.984016
2	Oxidation (M)	15.9949	0	63.9983
3	Propionamide (C)	71.0371
Search Parameters	--------------------------------------------------------
Taxonomy filter	. . . . . . Mycoplasma
Enzyme	semiTrypsin
Maximum Missed Cleavages	3
Fixed modifications
Variable modifications	Deamidated (NQ),Oxidation (M),Propionamide (C)
Peptide Mass Tolerance	100
Peptide Mass Tolerance Units	ppm
Fragment Mass Tolerance	0.2
Fragment Mass Tolerance Units	Da
Mass values	Monoisotopic
Instrument type	ESI-QUAD-TOF
Format parameters	--------------------------------------------------------
Significance threshold	0.05
Max. number of hits	0
Use MudPIT protein scoring	1
Ions score cut-off	0
Include same-set proteins	0
Include sub-set proteins	0
Include unassigned	0
Require bold red	1
Use homology threshold	0
Group protein families	0
Protein hits	--------------------------------------------------------
prot_hit_num	prot_acc	prot_desc	prot_score	prot_mass	prot_matches	prot_matches_sig	prot_sequences	prot_sequences_sig	pep_query	pep_rank	pep_isbold	pep_isunique	pep_exp_mz	pep_exp_mr	pep_exp_z	pep_calc_mr	pep_delta	pep_miss	pep_score	pep_expect	pep_res_before	pep_seq	pep_res_after	pep_var_mod	pep_var_mod_pos	pep_summed_mod_pos	pep_scan_title
27	2::WP_036453165.1	ref|WP_036453165.1| Mgp-operon protein 3, partial n=2 Tax_Id=2104 [Mycoplasma pneumoniae]	98	50097	3	1	3	1	333	1	1	1	645.852	1289.69	2	1289.67	0.0164	0	95	3e-06	R	VDFAANSVLQAR	N				File: MPNplg_7.wiff, Sample: 20140510 MPNplg_7 (sample number 1), Elution: 39.134 min, Period: 1, Cycle(s): 7300 (Experiment 3)
27	2::WP_036453165.1	ref|WP_036453165.1| Mgp-operon protein 3, partial n=2 Tax_Id=2104 [Mycoplasma pneumoniae]	98	50097	3	1	3	1	435	1	1	1	706.908	1411.8	2	1411.78	0.0184	0	39.28	0.87	K	IAGIPLNIDFPSR	I				File: MPNplg_7.wiff, Sample: 20140510 MPNplg_7 (sample number 1), Elution: 41.615 min, Period: 1, Cycle(s): 7404 (Experiment 4)
27	2::WP_036453165.1	ref|WP_036453165.1| Mgp-operon protein 3, partial n=2 Tax_Id=2104 [Mycoplasma pneumoniae]	98	50097	3	1	3	1	604	8	1	1	821.967	1641.92	2	1642	-0.0803	1	17.52	160	L	LILGLGIGIPMYKVR	K				File: MPNplg_7.wiff, Sample: 20140510 MPNplg_7 (sample number 1), Elution: 42.058 min, Period: 1, Cycle(s): 7422 (Experiment 3)
Also Scores 98 against Q50341
Found in gel mass range 21-35 kDa
Not BOLD RED ID: The peptide VDFAANSVLQAR is unassigned with BOLD RED but has a score of 81, Expect value of 6.8e-05
Peak list data path	C:\Analyst Data\Projects\Mpn\20140511 PLG MPN\MPNplg_9.wiff
Peak list format	Mascot generic
Search type	MIS
Mascot version	2.4.1
Database	1::contaminants 2::MSPnr100
Fasta file	1::contaminants_all_10062014.fasta 2::MSPnr100_Q215.fasta
Total sequences	68277407
Total residues	24208969539
Sequences after taxonomy filter	102795
Number of queries	417
Warning	No taxonomy indexes for contaminants, taxonomy ~Mycoplasma~ ignored. Searching all entries in contaminants
Variable modifications	--------------------------------------------------------
Identifier	Name	Delta	Neutral loss(es)
1	Deamidated (NQ)	0.984016
2	Oxidation (M)	15.9949	0	63.9983
3	Propionamide (C)	71.0371
Search Parameters	--------------------------------------------------------
Taxonomy filter	. . . . . . Mycoplasma
Enzyme	semiTrypsin
Maximum Missed Cleavages	3
Fixed modifications
Variable modifications	Deamidated (NQ),Oxidation (M),Propionamide (C)
Peptide Mass Tolerance	100
Peptide Mass Tolerance Units	ppm
Fragment Mass Tolerance	0.2
Fragment Mass Tolerance Units	Da
Mass values	Monoisotopic
Instrument type	ESI-QUAD-TOF
Format parameters	--------------------------------------------------------
Significance threshold	0.05
Max. number of hits	0
Use MudPIT protein scoring	0
Ions score cut-off	0
Include same-set proteins	0
Include sub-set proteins	0
Include unassigned	0
Require bold red	0
Use homology threshold	0
Group protein families	0
Protein hits	--------------------------------------------------------
prot_hit_num	prot_acc	prot_desc	prot_score	prot_mass	prot_matches	prot_matches_sig	prot_sequences	prot_sequences_sig	pep_query	pep_rank	pep_isbold	pep_isunique	pep_exp_mz	pep_exp_mr	pep_exp_z	pep_calc_mr	pep_delta	pep_miss	pep_score	pep_expect	pep_res_before	pep_seq	pep_res_after	pep_var_mod	pep_var_mod_pos	pep_summed_mod_pos	pep_scan_title
72	2::WP_017532792.1	ref|WP_017532792.1| Mgp-operon protein 3, partial n=2 Tax_Id=2104 [Mycoplasma pneumoniae]	79	75814	1	1	1	1	173	1	0	1	645.859	1289.7	2	1289.67	0.0309	0	81.27	6.8e-05	R	VDFAANSVLQAR	N				File: MPNplg_9.wiff, Sample: 20140510 MPNplg_9 (sample number 1), Elution: 49.027 min, Period: 1, Cycle(s): 10514 (Experiment 3)
BOLD RED: Unassigned	N/A	N/A	N/A	N/A	N/A	N/A	N/A	N/A	173	1	0	0	645.859	1289.7	N/A	1289.67	0.0309	0	81.27	6.8e-05	R	VDFAANSVLQAR	N				File: MPNplg_9.wiff, Sample: 20140510 MPNplg_9 (sample number 1), Elution: 49.027 min, Period: 1, Cycle(s): 10514 (Experiment 3)
Not BOLD RED ID: The peptide VDFAANSVLQAR is unassigned with BOLD RED but has a score of 81, Expect value of 6.8e-05

## Sheet: Fibronectin
Found in gel mass range 68-85 kDa
Also Scores 305 against Q50341
Peak list data path	C:\Analyst Data\Projects\Mpn\20140514 Fn Mpn\MPN Fn_28.wiff
Peak list format	Mascot generic
Search type	MIS
Mascot version	2.4.1
Database	1::contaminants 2::MSPnr100
Fasta file	1::contaminants_all_10062014.fasta 2::MSPnr100_Q215.fasta
Total sequences	68277407
Total residues	24208969539
Sequences after taxonomy filter	102795
Number of queries	1105
Warning	No taxonomy indexes for contaminants, taxonomy ~Mycoplasma~ ignored. Searching all entries in contaminants
Variable modifications	--------------------------------------------------------
Identifier	Name	Delta	Neutral loss(es)
1	Deamidated (NQ)	0.984016
2	Oxidation (M)	15.9949	0	63.9983
3	Propionamide (C)	71.0371
Search Parameters	--------------------------------------------------------
Taxonomy filter	. . . . . . Mycoplasma
Enzyme	semiTrypsin
Maximum Missed Cleavages	3
Fixed modifications
Variable modifications	Deamidated (NQ),Oxidation (M),Propionamide (C)
Peptide Mass Tolerance	100
Peptide Mass Tolerance Units	ppm
Fragment Mass Tolerance	0.2
Fragment Mass Tolerance Units	Da
Mass values	Monoisotopic
Instrument type	ESI-QUAD-TOF
Format parameters	--------------------------------------------------------
Significance threshold	0.05
Max. number of hits	0
Use MudPIT protein scoring	1
Ions score cut-off	0
Include same-set proteins	0
Include sub-set proteins	0
Include unassigned	0
Require bold red	1
Use homology threshold	0
Group protein families	0
Protein hits	--------------------------------------------------------
prot_hit_num	prot_acc	prot_desc	prot_score	prot_mass	prot_matches	prot_matches_sig	prot_sequences	prot_sequences_sig	pep_query	pep_rank	pep_isbold	pep_isunique	pep_exp_mz	pep_exp_mr	pep_exp_z	pep_calc_mr	pep_delta	pep_miss	pep_score	pep_expect	pep_res_before	pep_seq	pep_res_after	pep_var_mod	pep_var_mod_pos	pep_summed_mod_pos	pep_scan_title
9	2::WP_036453165.1	ref|WP_036453165.1| Mgp-operon protein 3, partial n=2 Tax_Id=2104 [Mycoplasma pneumoniae]	305	50097	10	6	10	6	266	1	1	1	642.852	1283.69	2	1283.64	0.0507	0	71.76	0.00054	K	LQDSSFVDVFK	K				File: MPN Fn_28.wiff, Sample: 20140513 MPN Fn_28 (sample number 1), Elution: 35.259 min, Period: 1, Cycle(s): 4997 (Experiment 3)
9	2::WP_036453165.1	ref|WP_036453165.1| Mgp-operon protein 3, partial n=2 Tax_Id=2104 [Mycoplasma pneumoniae]	305	50097	10	6	10	6	273	1	1	1	645.864	1289.71	2	1289.67	0.0405	0	100.14	8.6e-07	R	VDFAANSVLQAR	N				File: MPN Fn_28.wiff, Sample: 20140513 MPN Fn_28 (sample number 1), Elution: 28.999 min, Period: 1, Cycle(s): 4811 (Experiment 3)
9	2::WP_036453165.1	ref|WP_036453165.1| Mgp-operon protein 3, partial n=2 Tax_Id=2104 [Mycoplasma pneumoniae]	305	50097	10	6	10	6	330	1	1	1	677.385	1352.76	2	1352.72	0.0363	0	44.54	0.26	K	VDTLTTAVGSVYK	K				File: MPN Fn_28.wiff, Sample: 20140513 MPN Fn_28 (sample number 1), Elution: 28.838 to 29.193 min, Period: 1, Cycle(s): 4816 (Experiment 2), 4807, 4812 (Experiment 3)
9	2::WP_036453165.1	ref|WP_036453165.1| Mgp-operon protein 3, partial n=2 Tax_Id=2104 [Mycoplasma pneumoniae]	305	50097	10	6	10	6	385	1	1	1	706.893	1411.77	2	1411.73	0.0358	1	58.02	0.013	R	KLQDSSFVDVFK	K				File: MPN Fn_28.wiff, Sample: 20140513 MPN Fn_28 (sample number 1), Elution: 33.248 min, Period: 1, Cycle(s): 4943 (Experiment 3)
9	2::WP_036453165.1	ref|WP_036453165.1| Mgp-operon protein 3, partial n=2 Tax_Id=2104 [Mycoplasma pneumoniae]	305	50097	10	6	10	6	386	1	1	1	706.918	1411.82	2	1411.78	0.0386	0	44.01	0.26	K	IAGIPLNIDFPSR	I				File: MPN Fn_28.wiff, Sample: 20140513 MPN Fn_28 (sample number 1), Elution: 38.716 min, Period: 1, Cycle(s): 5108 (Experiment 3)
9	2::WP_036453165.1	ref|WP_036453165.1| Mgp-operon protein 3, partial n=2 Tax_Id=2104 [Mycoplasma pneumoniae]	305	50097	10	6	10	6	422	1	1	1	727.442	1452.87	2	1452.82	0.0501	0	44	0.2	R	GHKPNYSAVLLVR	G				File: MPN Fn_28.wiff, Sample: 20140513 MPN Fn_28 (sample number 1), Elution: 27.779 min, Period: 1, Cycle(s): 4780 (Experiment 2)
9	2::WP_036453165.1	ref|WP_036453165.1| Mgp-operon protein 3, partial n=2 Tax_Id=2104 [Mycoplasma pneumoniae]	305	50097	10	6	10	6	442	1	1	1	741.436	1480.86	2	1480.81	0.0446	1	126.86	1.4e-09	K	KVDTLTTAVGSVYK	K				File: MPN Fn_28.wiff, Sample: 20140513 MPN Fn_28 (sample number 1), Elution: 26.995 min, Period: 1, Cycle(s): 4759 (Experiment 4)
9	2::WP_036453165.1	ref|WP_036453165.1| Mgp-operon protein 3, partial n=2 Tax_Id=2104 [Mycoplasma pneumoniae]	305	50097	10	6	10	6	596	1	1	1	825.394	1648.77	2	1648.73	0.0474	0	85.29	3.1e-05	K	IEYLDGNFYGEDSK	I				File: MPN Fn_28.wiff, Sample: 20140513 MPN Fn_28 (sample number 1), Elution: 29.705 min, Period: 1, Cycle(s): 4843 (Experiment 2)
9	2::WP_036453165.1	ref|WP_036453165.1| Mgp-operon protein 3, partial n=2 Tax_Id=2104 [Mycoplasma pneumoniae]	305	50097	10	6	10	6	771	1	1	1	640.404	1918.19	3	1918.12	0.0746	0	27.83	7.4	K	APVKPAAPTAPRPPVQPPK	K				File: MPN Fn_28.wiff, Sample: 20140513 MPN Fn_28 (sample number 1), Elution: 21.668 min, Period: 1, Cycle(s): 4509 (Experiment 2)
9	2::WP_036453165.1	ref|WP_036453165.1| Mgp-operon protein 3, partial n=2 Tax_Id=2104 [Mycoplasma pneumoniae]	305	50097	10	6	10	6	952	1	1	1	828.781	2483.32	3	2483.25	0.067	0	61.78	0.0086	K	ISTLESQATDGFANSLLNFGTGLK	A				File: MPN Fn_28.wiff, Sample: 20140513 MPN Fn_28 (sample number 1), Elution: 40.321 min, Period: 1, Cycle(s): 5165 (Experiment 4)
Also Scores 305 against Q50341
Found in gel mass range 55-60 kDa
Also Scores 115 against Q50341
Peak list data path	C:\Analyst Data\Projects\Mpn\20140514 Fn Mpn\MPN Fn_30.wiff
Peak list format	Mascot generic
Search type	MIS
Mascot version	2.4.1
Database	1::contaminants 2::MSPnr100
Fasta file	1::contaminants_all_10062014.fasta 2::MSPnr100_Q215.fasta
Total sequences	68277407
Total residues	24208969539
Sequences after taxonomy filter	102795
Number of queries	1159
Warning	No taxonomy indexes for contaminants, taxonomy ~Mycoplasma~ ignored. Searching all entries in contaminants
Variable modifications	--------------------------------------------------------
Identifier	Name	Delta	Neutral loss(es)
1	Deamidated (NQ)	0.984016
2	Oxidation (M)	15.9949	0	63.9983
3	Propionamide (C)	71.0371
Search Parameters	--------------------------------------------------------
Taxonomy filter	. . . . . . Mycoplasma
Enzyme	semiTrypsin
Maximum Missed Cleavages	3
Fixed modifications
Variable modifications	Deamidated (NQ),Oxidation (M),Propionamide (C)
Peptide Mass Tolerance	100
Peptide Mass Tolerance Units	ppm
Fragment Mass Tolerance	0.2
Fragment Mass Tolerance Units	Da
Mass values	Monoisotopic
Instrument type	ESI-QUAD-TOF
Format parameters	--------------------------------------------------------
Significance threshold	0.05
Max. number of hits	0
Use MudPIT protein scoring	1
Ions score cut-off	0
Include same-set proteins	0
Include sub-set proteins	0
Include unassigned	0
Require bold red	1
Use homology threshold	0
Group protein families	0
Protein hits	--------------------------------------------------------
prot_hit_num	prot_acc	prot_desc	prot_score	prot_mass	prot_matches	prot_matches_sig	prot_sequences	prot_sequences_sig	pep_query	pep_rank	pep_isbold	pep_isunique	pep_exp_mz	pep_exp_mr	pep_exp_z	pep_calc_mr	pep_delta	pep_miss	pep_score	pep_expect	pep_res_before	pep_seq	pep_res_after	pep_var_mod	pep_var_mod_pos	pep_summed_mod_pos	pep_scan_title
26	2::WP_036453165.1	ref|WP_036453165.1| Mgp-operon protein 3, partial n=2 Tax_Id=2104 [Mycoplasma pneumoniae]	115	50097	2	2	2	2	324	1	1	1	645.859	1289.7	2	1289.67	0.0309	0	96.73	1.9e-06	R	VDFAANSVLQAR	N				File: MPN Fn_30.wiff, Sample: 20140513 MPN Fn_30 (sample number 1), Elution: 29.722 min, Period: 1, Cycle(s): 4867 (Experiment 4)
26	2::WP_036453165.1	ref|WP_036453165.1| Mgp-operon protein 3, partial n=2 Tax_Id=2104 [Mycoplasma pneumoniae]	115	50097	2	2	2	2	1028	1	1	1	828.778	2483.31	3	2483.25	0.0588	0	61.91	0.0084	K	ISTLESQATDGFANSLLNFGTGLK	A				File: MPN Fn_30.wiff, Sample: 20140513 MPN Fn_30 (sample number 1), Elution: 40.442 min, Period: 1, Cycle(s): 5199 (Experiment 3)
Also Scores 115 against Q50341
Found in gel mass range 40-45 kDa
Peak list data path	C:\Analyst Data\Projects\Mpn\20140514 Fn Mpn\MPN Fn_32.wiff
Peak list format	Mascot generic
Search type	MIS
Mascot version	2.4.1
Database	1::contaminants 2::MSPnr100
Fasta file	1::contaminants_all_10062014.fasta 2::MSPnr100_Q215.fasta
Total sequences	68277407
Total residues	24208969539
Sequences after taxonomy filter	102795
Number of queries	1306
Warning	No taxonomy indexes for contaminants, taxonomy ~Mycoplasma~ ignored. Searching all entries in contaminants
Variable modifications	--------------------------------------------------------
Identifier	Name	Delta	Neutral loss(es)
1	Deamidated (NQ)	0.984016
2	Oxidation (M)	15.9949	0	63.9983
3	Propionamide (C)	71.0371
Search Parameters	--------------------------------------------------------
Taxonomy filter	. . . . . . Mycoplasma
Enzyme	semiTrypsin
Maximum Missed Cleavages	3
Fixed modifications
Variable modifications	Deamidated (NQ),Oxidation (M),Propionamide (C)
Peptide Mass Tolerance	100
Peptide Mass Tolerance Units	ppm
Fragment Mass Tolerance	0.2
Fragment Mass Tolerance Units	Da
Mass values	Monoisotopic
Instrument type	ESI-QUAD-TOF
Format parameters	--------------------------------------------------------
Significance threshold	0.05
Max. number of hits	0
Use MudPIT protein scoring	1
Ions score cut-off	0
Include same-set proteins	0
Include sub-set proteins	0
Include unassigned	0
Require bold red	1
Use homology threshold	0
Group protein families	0
Protein hits	--------------------------------------------------------
prot_hit_num	prot_acc	prot_desc	prot_score	prot_mass	prot_matches	prot_matches_sig	prot_sequences	prot_sequences_sig	pep_query	pep_rank	pep_isbold	pep_isunique	pep_exp_mz	pep_exp_mr	pep_exp_z	pep_calc_mr	pep_delta	pep_miss	pep_score	pep_expect	pep_res_before	pep_seq	pep_res_after	pep_var_mod	pep_var_mod_pos	pep_summed_mod_pos	pep_scan_title
29	2::E1QBR0	tr|E1QBR0|mgpC_3 E1QBR0_MYCPB MgpC protein n=3 Tax_Id=722438 [Mycoplasma pneumoniae (strain ATCC 15531 / NBRC 14401 / NCTC 10119 / FH)]	174	124466	8	2	8	2	357	1	1	1	645.864	1289.71	2	1289.67	0.0405	0	81.9	5.7e-05	R	VDFAANSVLQAR	N				File: MPN Fn_32.wiff, Sample: 20140513 MPN Fn_32 (sample number 1), Elution: 29.903 min, Period: 1, Cycle(s): 4923 (Experiment 3)
29	2::E1QBR0	tr|E1QBR0|mgpC_3 E1QBR0_MYCPB MgpC protein n=3 Tax_Id=722438 [Mycoplasma pneumoniae (strain ATCC 15531 / NBRC 14401 / NCTC 10119 / FH)]	174	124466	8	2	8	2	501	1	1	1	706.923	1411.83	2	1411.78	0.0487	0	39.39	0.69	K	IAGIPLNIDFPSR	I				File: MPN Fn_32.wiff, Sample: 20140513 MPN Fn_32 (sample number 1), Elution: 38.755 to 38.946 min, Period: 1, Cycle(s): 5218 (Experiment 2), 5224 (Experiment 4)
29	2::E1QBR0	tr|E1QBR0|mgpC_3 E1QBR0_MYCPB MgpC protein n=3 Tax_Id=722438 [Mycoplasma pneumoniae (strain ATCC 15531 / NBRC 14401 / NCTC 10119 / FH)]	174	124466	8	2	8	2	549	9	1	1	727.437	1452.86	2	1452.82	0.0398	0	8.04	880	R	GHKPNYSAVLLVR	G				File: MPN Fn_32.wiff, Sample: 20140513 MPN Fn_32 (sample number 1), Elution: 28.716 to 28.984 min, Period: 1, Cycle(s): 4896 (Experiment 3), 4889 (Experiment 4)
29	2::E1QBR0	tr|E1QBR0|mgpC_3 E1QBR0_MYCPB MgpC protein n=3 Tax_Id=722438 [Mycoplasma pneumoniae (strain ATCC 15531 / NBRC 14401 / NCTC 10119 / FH)]	174	124466	8	2	8	2	578	1	1	0	741.434	1480.85	2	1480.81	0.0394	1	123.29	3.3e-09	K	KVDTLTTAVGSVYK	K				File: MPN Fn_32.wiff, Sample: 20140513 MPN Fn_32 (sample number 1), Elution: 27.989 min, Period: 1, Cycle(s): 4864 (Experiment 4)
29	2::E1QBR0	tr|E1QBR0|mgpC_3 E1QBR0_MYCPB MgpC protein n=3 Tax_Id=722438 [Mycoplasma pneumoniae (strain ATCC 15531 / NBRC 14401 / NCTC 10119 / FH)]	174	124466	8	2	8	2	792	1	1	1	825.402	1648.79	2	1648.73	0.0637	0	28.62	15	K	IEYLDGNFYGEDSK	I				File: MPN Fn_32.wiff, Sample: 20140513 MPN Fn_32 (sample number 1), Elution: 30.571 min, Period: 1, Cycle(s): 4945 (Experiment 3)
29	2::E1QBR0	tr|E1QBR0|mgpC_3 E1QBR0_MYCPB MgpC protein n=3 Tax_Id=722438 [Mycoplasma pneumoniae (strain ATCC 15531 / NBRC 14401 / NCTC 10119 / FH)]	174	124466	8	2	8	2	993	1	1	1	640.397	1918.17	3	1918.12	0.053	0	37.18	1.1	K	APVKPAAPTAPRPPVQPPK	K				File: MPN Fn_32.wiff, Sample: 20140513 MPN Fn_32 (sample number 1), Elution: 23.218 min, Period: 1, Cycle(s): 4715 (Experiment 2)
29	2::E1QBR0	tr|E1QBR0|mgpC_3 E1QBR0_MYCPB MgpC protein n=3 Tax_Id=722438 [Mycoplasma pneumoniae (strain ATCC 15531 / NBRC 14401 / NCTC 10119 / FH)]	174	124466	8	2	8	2	1180	10	1	1	799.715	2396.12	3	2396.16	-0.0341	2	9.74	1400	T	VAVQKSDSSGSQGQGTTDNKFQK	Y				File: MPN Fn_32.wiff, Sample: 20140513 MPN Fn_32 (sample number 1), Elution: 19.52 min, Period: 1, Cycle(s): 4271 (Experiment 2)
29	2::E1QBR0	tr|E1QBR0|mgpC_3 E1QBR0_MYCPB MgpC protein n=3 Tax_Id=722438 [Mycoplasma pneumoniae (strain ATCC 15531 / NBRC 14401 / NCTC 10119 / FH)]	174	124466	8	2	8	2	1195	1	1	1	828.778	2483.31	3	2483.25	0.0588	0	45.01	0.41	K	ISTLESQATDGFANSLLNFGTGLK	A				File: MPN Fn_32.wiff, Sample: 20140513 MPN Fn_32 (sample number 1), Elution: 40.274 min, Period: 1, Cycle(s): 5279 (Experiment 4)
Found in gel mass range 38-40 kDa
Also Scores 116 against E1QBR0
Peak list data path	C:\Analyst Data\Projects\Mpn\20140514 Fn Mpn\MPN Fn_33.wiff
Peak list format	Mascot generic
Search type	MIS
Mascot version	2.4.1
Database	1::contaminants 2::MSPnr100
Fasta file	1::contaminants_all_10062014.fasta 2::MSPnr100_Q215.fasta
Total sequences	68277407
Total residues	24208969539
Sequences after taxonomy filter	102795
Number of queries	1341
Warning	No taxonomy indexes for contaminants, taxonomy ~Mycoplasma~ ignored. Searching all entries in contaminants
Variable modifications	--------------------------------------------------------
Identifier	Name	Delta	Neutral loss(es)
1	Deamidated (NQ)	0.984016
2	Oxidation (M)	15.9949	0	63.9983
3	Propionamide (C)	71.0371
Search Parameters	--------------------------------------------------------
Taxonomy filter	. . . . . . Mycoplasma
Enzyme	semiTrypsin
Maximum Missed Cleavages	3
Fixed modifications
Variable modifications	Deamidated (NQ),Oxidation (M),Propionamide (C)
Peptide Mass Tolerance	100
Peptide Mass Tolerance Units	ppm
Fragment Mass Tolerance	0.2
Fragment Mass Tolerance Units	Da
Mass values	Monoisotopic
Instrument type	ESI-QUAD-TOF
Format parameters	--------------------------------------------------------
Significance threshold	0.05
Max. number of hits	0
Use MudPIT protein scoring	1
Ions score cut-off	0
Include same-set proteins	0
Include sub-set proteins	0
Include unassigned	0
Require bold red	1
Use homology threshold	0
Group protein families	0
Protein hits	--------------------------------------------------------
prot_hit_num	prot_acc	prot_desc	prot_score	prot_mass	prot_matches	prot_matches_sig	prot_sequences	prot_sequences_sig	pep_query	pep_rank	pep_isbold	pep_isunique	pep_exp_mz	pep_exp_mr	pep_exp_z	pep_calc_mr	pep_delta	pep_miss	pep_score	pep_expect	pep_res_before	pep_seq	pep_res_after	pep_var_mod	pep_var_mod_pos	pep_summed_mod_pos	pep_scan_title
54	2::149999578	gi|149999578|gb|ABR53879.1| cytadherence-involved protein, partial n=1 Tax_Id=2104 [Mycoplasma pneumoniae]	116	58777	6	3	6	3	73	1	1	0	454.751	907.487	2	907.455	0.0318	0	32.82	3.6	R	ATWVFER	K				File: MPN Fn_33.wiff, Sample: 20140513 MPN Fn_33 (sample number 1), Elution: 31.513 min, Period: 1, Cycle(s): 5086 (Experiment 3)
54	2::149999578	gi|149999578|gb|ABR53879.1| cytadherence-involved protein, partial n=1 Tax_Id=2104 [Mycoplasma pneumoniae]	116	58777	6	3	6	3	904	1	1	1	889.464	1776.91	2	1776.86	0.0557	0	57.08	0.023	K	LNESWPVYEPLDSTK	N				File: MPN Fn_33.wiff, Sample: 20140513 MPN Fn_33 (sample number 1), Elution: 35.437 to 35.593 min, Period: 1, Cycle(s): 5219, 5224 (Experiment 4)
54	2::149999578	gi|149999578|gb|ABR53879.1| cytadherence-involved protein, partial n=1 Tax_Id=2104 [Mycoplasma pneumoniae]	116	58777	6	3	6	3	996	1	1	1	953.512	1905.01	2	1904.95	0.0568	1	56.81	0.024	R	KLNESWPVYEPLDSTK	N				File: MPN Fn_33.wiff, Sample: 20140513 MPN Fn_33 (sample number 1), Elution: 33.924 min, Period: 1, Cycle(s): 5166 (Experiment 3)
54	2::149999578	gi|149999578|gb|ABR53879.1| cytadherence-involved protein, partial n=1 Tax_Id=2104 [Mycoplasma pneumoniae]	116	58777	6	3	6	3	1205	1	1	1	799.455	2395.34	3	2395.27	0.0689	0	36.81	2.3	K	TLQDLLVEQPVTPYTPNAGLAR	V				File: MPN Fn_33.wiff, Sample: 20140513 MPN Fn_33 (sample number 1), Elution: 38.672 min, Period: 1, Cycle(s): 5334 (Experiment 4)
54	2::149999578	gi|149999578|gb|ABR53879.1| cytadherence-involved protein, partial n=1 Tax_Id=2104 [Mycoplasma pneumoniae]	116	58777	6	3	6	3	1206	10	1	1	799.712	2396.11	3	2396.16	-0.0421	2	9.77	1300	T	VAVQKSDSSGSQGQGTTDNKFQK	Y				File: MPN Fn_33.wiff, Sample: 20140513 MPN Fn_33 (sample number 1), Elution: 20.855 min, Period: 1, Cycle(s): 4459 (Experiment 2)
54	2::149999578	gi|149999578|gb|ABR53879.1| cytadherence-involved protein, partial n=1 Tax_Id=2104 [Mycoplasma pneumoniae]	116	58777	6	3	6	3	1287	1	1	1	956.804	2867.39	3	2867.31	0.0792	0	69.01	0.0017	K	ALNGSQSGSSDTSGSNSQDFASYVLIFK	A	Deamidated (NQ)	0.0010000000000000000000000000.0		File: MPN Fn_33.wiff, Sample: 20140513 MPN Fn_33 (sample number 1), Elution: 40.04 min, Period: 1, Cycle(s): 5391 (Experiment 3)
Also Scores 116 against E1QBR0
Found in gel mass range 20-38 kDa
Peak list data path	C:\Analyst Data\Projects\Mpn\20140514 Fn Mpn\MPN Fn_34.wiff
Peak list format	Mascot generic
Search type	MIS
Mascot version	2.4.1
Database	1::contaminants 2::MSPnr100
Fasta file	1::contaminants_all_10062014.fasta 2::MSPnr100_Q215.fasta
Total sequences	68277407
Total residues	24208969539
Sequences after taxonomy filter	102795
Number of queries	1176
Warning	No taxonomy indexes for contaminants, taxonomy ~Mycoplasma~ ignored. Searching all entries in contaminants
Variable modifications	--------------------------------------------------------
Identifier	Name	Delta	Neutral loss(es)
1	Deamidated (NQ)	0.984016
2	Oxidation (M)	15.9949	0	63.9983
3	Propionamide (C)	71.0371
Search Parameters	--------------------------------------------------------
Taxonomy filter	. . . . . . Mycoplasma
Enzyme	semiTrypsin
Maximum Missed Cleavages	3
Fixed modifications
Variable modifications	Deamidated (NQ),Oxidation (M),Propionamide (C)
Peptide Mass Tolerance	100
Peptide Mass Tolerance Units	ppm
Fragment Mass Tolerance	0.2
Fragment Mass Tolerance Units	Da
Mass values	Monoisotopic
Instrument type	ESI-QUAD-TOF
Format parameters	--------------------------------------------------------
Significance threshold	0.05
Max. number of hits	0
Use MudPIT protein scoring	1
Ions score cut-off	0
Include same-set proteins	0
Include sub-set proteins	0
Include unassigned	0
Require bold red	1
Use homology threshold	0
Group protein families	0
Protein hits	--------------------------------------------------------
prot_hit_num	prot_acc	prot_desc	prot_score	prot_mass	prot_matches	prot_matches_sig	prot_sequences	prot_sequences_sig	pep_query	pep_rank	pep_isbold	pep_isunique	pep_exp_mz	pep_exp_mr	pep_exp_z	pep_calc_mr	pep_delta	pep_miss	pep_score	pep_expect	pep_res_before	pep_seq	pep_res_after	pep_var_mod	pep_var_mod_pos	pep_summed_mod_pos	pep_scan_title
15	2::M1GEE6	tr|M1GEE6|C985_0143 M1GEE6_MYCPM P1-like adhesin n=3 Tax_Id=1238993 [Mycoplasma pneumoniae M129-B7]	176	130412	8	3	7	3	91	10	1	1	467.298	932.581	2	932.493	0.0879	2	14.85	120	K	VRKLQDSS	F	Deamidated (NQ)	0.00001000.0		File: MPN Fn_34.wiff, Sample: 20140513 MPN Fn_34 (sample number 1), Elution: 38.318 min, Period: 1, Cycle(s): 5824 (Experiment 3)
15	2::M1GEE6	tr|M1GEE6|C985_0143 M1GEE6_MYCPM P1-like adhesin n=3 Tax_Id=1238993 [Mycoplasma pneumoniae M129-B7]	176	130412	8	3	7	3	534	1	1	1	706.895	1411.78	2	1411.73	0.0409	1	74.28	0.00031	R	KLQDSSFVDVFK	K				File: MPN Fn_34.wiff, Sample: 20140513 MPN Fn_34 (sample number 1), Elution: 37.931 min, Period: 1, Cycle(s): 5811 (Experiment 4)
15	2::M1GEE6	tr|M1GEE6|C985_0143 M1GEE6_MYCPM P1-like adhesin n=3 Tax_Id=1238993 [Mycoplasma pneumoniae M129-B7]	176	130412	8	3	7	3	613	1	1	0	741.434	1480.85	2	1480.81	0.0394	1	111.23	5.3e-08	K	KVDTLTTAVGSVYK	K				File: MPN Fn_34.wiff, Sample: 20140513 MPN Fn_34 (sample number 1), Elution: 32.142 min, Period: 1, Cycle(s): 5616 (Experiment 4)
15	2::M1GEE6	tr|M1GEE6|C985_0143 M1GEE6_MYCPM P1-like adhesin n=3 Tax_Id=1238993 [Mycoplasma pneumoniae M129-B7]	176	130412	8	3	7	3	797	1	1	1	825.407	1648.8	2	1648.73	0.0746	0	76.75	0.00023	K	IEYLDGNFYGEDSK	I				File: MPN Fn_34.wiff, Sample: 20140513 MPN Fn_34 (sample number 1), Elution: 34.724 min, Period: 1, Cycle(s): 5696 (Experiment 3)
15	2::M1GEE6	tr|M1GEE6|C985_0143 M1GEE6_MYCPM P1-like adhesin n=3 Tax_Id=1238993 [Mycoplasma pneumoniae M129-B7]	176	130412	8	3	7	3	955	1	1	1	939.98	1877.95	2	1877.93	0.0122	1	34.78	3.9	S	ASSLQGNGSNSSGLKSLLR	S	3 Deamidated (NQ)	0.0000101001000000000.0		File: MPN Fn_34.wiff, Sample: 20140513 MPN Fn_34 (sample number 1), Elution: 31.018 min, Period: 1, Cycle(s): 5588 (Experiment 4)
15	2::M1GEE6	tr|M1GEE6|C985_0143 M1GEE6_MYCPM P1-like adhesin n=3 Tax_Id=1238993 [Mycoplasma pneumoniae M129-B7]	176	130412	8	3	7	3	975	1	1	1	640.402	1918.18	3	1918.12	0.0674	0	41.11	0.38	K	APVKPAAPTAPRPPVQPPK	K				File: MPN Fn_34.wiff, Sample: 20140513 MPN Fn_34 (sample number 1), Elution: 25.887 min, Period: 1, Cycle(s): 5352 (Experiment 2)
15	2::M1GEE6	tr|M1GEE6|C985_0143 M1GEE6_MYCPM P1-like adhesin n=3 Tax_Id=1238993 [Mycoplasma pneumoniae M129-B7]	176	130412	8	3	7	3	976	1	1	1	640.402	1918.18	3	1918.12	0.0674	0	31.36	3.6	K	APVKPAAPTAPRPPVQPPK	K				File: MPN Fn_34.wiff, Sample: 20140513 MPN Fn_34 (sample number 1), Elution: 25.717 min, Period: 1, Cycle(s): 5332 (Experiment 2)
15	2::M1GEE6	tr|M1GEE6|C985_0143 M1GEE6_MYCPM P1-like adhesin n=3 Tax_Id=1238993 [Mycoplasma pneumoniae M129-B7]	176	130412	8	3	7	3	1123	1	1	1	799.452	2395.34	3	2395.27	0.0609	0	23.47	52	K	TLQDLLVEQPVTPYTPNAGLAR	V				File: MPN Fn_34.wiff, Sample: 20140513 MPN Fn_34 (sample number 1), Elution: 39.929 min, Period: 1, Cycle(s): 5891 (Experiment 3)
Found in gel mass range 15-20 kDa
Peak list data path	C:\Analyst Data\Projects\Mpn\20140514 Fn Mpn\MPN Fn_35.wiff
Peak list format	Mascot generic
Search type	MIS
Mascot version	2.4.1
Database	1::contaminants 2::MSPnr100
Fasta file	1::contaminants_all_10062014.fasta 2::MSPnr100_Q215.fasta
Total sequences	68277407
Total residues	24208969539
Sequences after taxonomy filter	102795
Number of queries	1275
Warning	No taxonomy indexes for contaminants, taxonomy ~Mycoplasma~ ignored. Searching all entries in contaminants
Variable modifications	--------------------------------------------------------
Identifier	Name	Delta	Neutral loss(es)
1	Deamidated (NQ)	0.984016
2	Oxidation (M)	15.9949	0	63.9983
3	Propionamide (C)	71.0371
Search Parameters	--------------------------------------------------------
Taxonomy filter	. . . . . . Mycoplasma
Enzyme	semiTrypsin
Maximum Missed Cleavages	3
Fixed modifications
Variable modifications	Deamidated (NQ),Oxidation (M),Propionamide (C)
Peptide Mass Tolerance	100
Peptide Mass Tolerance Units	ppm
Fragment Mass Tolerance	0.2
Fragment Mass Tolerance Units	Da
Mass values	Monoisotopic
Instrument type	ESI-QUAD-TOF
Format parameters	--------------------------------------------------------
Significance threshold	0.05
Max. number of hits	0
Use MudPIT protein scoring	1
Ions score cut-off	0
Include same-set proteins	0
Include sub-set proteins	0
Include unassigned	0
Require bold red	1
Use homology threshold	0
Group protein families	0
Protein hits	--------------------------------------------------------
prot_hit_num	prot_acc	prot_desc	prot_score	prot_mass	prot_matches	prot_matches_sig	prot_sequences	prot_sequences_sig	pep_query	pep_rank	pep_isbold	pep_isunique	pep_exp_mz	pep_exp_mr	pep_exp_z	pep_calc_mr	pep_delta	pep_miss	pep_score	pep_expect	pep_res_before	pep_seq	pep_res_after	pep_var_mod	pep_var_mod_pos	pep_summed_mod_pos	pep_scan_title
28	2::E1QBR0	tr|E1QBR0|mgpC_3 E1QBR0_MYCPB MgpC protein n=3 Tax_Id=722438 [Mycoplasma pneumoniae (strain ATCC 15531 / NBRC 14401 / NCTC 10119 / FH)]	170	124466	8	3	7	3	538	1	0	0	706.895	1411.78	2	1411.73	0.0409	1	89.88	8.5e-06	R	KLQDSSFVDVFK	K				File: MPN Fn_35.wiff, Sample: 20140513 MPN Fn_35 (sample number 1), Elution: 35.717 min, Period: 1, Cycle(s): 5403 (Experiment 2)
28	2::E1QBR0	tr|E1QBR0|mgpC_3 E1QBR0_MYCPB MgpC protein n=3 Tax_Id=722438 [Mycoplasma pneumoniae (strain ATCC 15531 / NBRC 14401 / NCTC 10119 / FH)]	170	124466	8	3	7	3	539	1	0	0	706.91	1411.81	2	1411.78	0.0235	0	39.17	0.87	K	IAGIPLNIDFPSR	I				File: MPN Fn_35.wiff, Sample: 20140513 MPN Fn_35 (sample number 1), Elution: 39.683 to 39.718 min, Period: 1, Cycle(s): 5544 (Experiment 2), 5542 (Experiment 4)
28	2::E1QBR0	tr|E1QBR0|mgpC_3 E1QBR0_MYCPB MgpC protein n=3 Tax_Id=722438 [Mycoplasma pneumoniae (strain ATCC 15531 / NBRC 14401 / NCTC 10119 / FH)]	170	124466	8	3	7	3	627	1	0	0	741.434	1480.85	2	1480.81	0.0394	1	71.39	0.00051	K	KVDTLTTAVGSVYK	K				File: MPN Fn_35.wiff, Sample: 20140513 MPN Fn_35 (sample number 1), Elution: 29.721 min, Period: 1, Cycle(s): 5204 (Experiment 4)
28	2::E1QBR0	tr|E1QBR0|mgpC_3 E1QBR0_MYCPB MgpC protein n=3 Tax_Id=722438 [Mycoplasma pneumoniae (strain ATCC 15531 / NBRC 14401 / NCTC 10119 / FH)]	170	124466	8	3	7	3	827	1	0	0	825.402	1648.79	2	1648.73	0.0637	0	68.06	0.0017	K	IEYLDGNFYGEDSK	I				File: MPN Fn_35.wiff, Sample: 20140513 MPN Fn_35 (sample number 1), Elution: 32.285 min, Period: 1, Cycle(s): 5280 (Experiment 3)
28	2::E1QBR0	tr|E1QBR0|mgpC_3 E1QBR0_MYCPB MgpC protein n=3 Tax_Id=722438 [Mycoplasma pneumoniae (strain ATCC 15531 / NBRC 14401 / NCTC 10119 / FH)]	170	124466	8	3	7	3	1018	1	0	0	640.402	1918.18	3	1918.12	0.0674	0	38.19	0.74	K	APVKPAAPTAPRPPVQPPK	K				File: MPN Fn_35.wiff, Sample: 20140513 MPN Fn_35 (sample number 1), Elution: 24.224 min, Period: 1, Cycle(s): 4974 (Experiment 2)
28	2::E1QBR0	tr|E1QBR0|mgpC_3 E1QBR0_MYCPB MgpC protein n=3 Tax_Id=722438 [Mycoplasma pneumoniae (strain ATCC 15531 / NBRC 14401 / NCTC 10119 / FH)]	170	124466	8	3	7	3	1019	1	0	0	640.406	1918.2	3	1918.12	0.0817	0	39.58	0.44	K	APVKPAAPTAPRPPVQPPK	K				File: MPN Fn_35.wiff, Sample: 20140513 MPN Fn_35 (sample number 1), Elution: 24.055 min, Period: 1, Cycle(s): 4953 (Experiment 2)
28	2::E1QBR0	tr|E1QBR0|mgpC_3 E1QBR0_MYCPB MgpC protein n=3 Tax_Id=722438 [Mycoplasma pneumoniae (strain ATCC 15531 / NBRC 14401 / NCTC 10119 / FH)]	170	124466	8	3	7	3	1194	1	1	1	799.452	2395.34	3	2395.27	0.0609	0	27.75	19	K	TLQDLLVEQPVTPYTPNAGLAR	V				File: MPN Fn_35.wiff, Sample: 20140513 MPN Fn_35 (sample number 1), Elution: 39.22 min, Period: 1, Cycle(s): 5524 (Experiment 4)
28	2::E1QBR0	tr|E1QBR0|mgpC_3 E1QBR0_MYCPB MgpC protein n=3 Tax_Id=722438 [Mycoplasma pneumoniae (strain ATCC 15531 / NBRC 14401 / NCTC 10119 / FH)]	170	124466	8	3	7	3	1195	10	1	1	799.717	2396.13	3	2396.16	-0.026	2	10.66	1100	T	VAVQKSDSSGSQGQGTTDNKFQK	Y				File: MPN Fn_35.wiff, Sample: 20140513 MPN Fn_35 (sample number 1), Elution: 19.231 min, Period: 1, Cycle(s): 4152 (Experiment 2)
Found in gel mass range 0-15 kDa
Also Scores 76 against Q50341
Peak list data path	C:\Analyst Data\Projects\Mpn\20140514 Fn Mpn\MPN Fn_36.wiff
Peak list format	Mascot generic
Search type	MIS
Mascot version	2.4.1
Database	1::contaminants 2::MSPnr100
Fasta file	1::contaminants_all_10062014.fasta 2::MSPnr100_Q215.fasta
Total sequences	68277407
Total residues	24208969539
Sequences after taxonomy filter	102795
Number of queries	1012
Warning	No taxonomy indexes for contaminants, taxonomy ~Mycoplasma~ ignored. Searching all entries in contaminants
Variable modifications	--------------------------------------------------------
Identifier	Name	Delta	Neutral loss(es)
1	Deamidated (NQ)	0.984016
2	Oxidation (M)	15.9949	0	63.9983
3	Propionamide (C)	71.0371
Search Parameters	--------------------------------------------------------
Taxonomy filter	. . . . . . Mycoplasma
Enzyme	semiTrypsin
Maximum Missed Cleavages	3
Fixed modifications
Variable modifications	Deamidated (NQ),Oxidation (M),Propionamide (C)
Peptide Mass Tolerance	100
Peptide Mass Tolerance Units	ppm
Fragment Mass Tolerance	0.2
Fragment Mass Tolerance Units	Da
Mass values	Monoisotopic
Instrument type	ESI-QUAD-TOF
Format parameters	--------------------------------------------------------
Significance threshold	0.05
Max. number of hits	0
Use MudPIT protein scoring	1
Ions score cut-off	0
Include same-set proteins	0
Include sub-set proteins	0
Include unassigned	0
Require bold red	1
Use homology threshold	0
Group protein families	0
Protein hits	--------------------------------------------------------
prot_hit_num	prot_acc	prot_desc	prot_score	prot_mass	prot_matches	prot_matches_sig	prot_sequences	prot_sequences_sig	pep_query	pep_rank	pep_isbold	pep_isunique	pep_exp_mz	pep_exp_mr	pep_exp_z	pep_calc_mr	pep_delta	pep_miss	pep_score	pep_expect	pep_res_before	pep_seq	pep_res_after	pep_var_mod	pep_var_mod_pos	pep_summed_mod_pos	pep_scan_title
74	2::WP_017532792.1	ref|WP_017532792.1| Mgp-operon protein 3, partial n=2 Tax_Id=2104 [Mycoplasma pneumoniae]	76	75814	1	1	1	1	375	1	1	1	645.859	1289.7	2	1289.67	0.0309	0	76.05	0.00023	R	VDFAANSVLQAR	N				File: MPN Fn_36.wiff, Sample: 20140513 MPN Fn_36 (sample number 1), Elution: 30.927 min, Period: 1, Cycle(s): 5169 (Experiment 2)
Also Scores 76 against Q50341

## Sheet: Actin
Found in gel mass range 75-100 kDa
Peak list data path	C:\Analyst Data\Projects\Mpn\20140809 Actin MPN\MPN ACTIN_4.wiff
Peak list format	Mascot generic
Search type	MIS
Mascot version	2.4.1
Database	1::contaminants 2::MSPnr100
Fasta file	1::contaminants_all_10062014.fasta 2::MSPnr100_Q215.fasta
Total sequences	68277407
Total residues	24208969539
Sequences after taxonomy filter	102795
Number of queries	1564
Warning	No taxonomy indexes for contaminants, taxonomy ~Mycoplasma~ ignored. Searching all entries in contaminants
Variable modifications	--------------------------------------------------------
Identifier	Name	Delta	Neutral loss(es)
1	Deamidated (NQ)	0.984016
2	Oxidation (M)	15.9949	0	63.9983
3	Propionamide (C)	71.0371
Search Parameters	--------------------------------------------------------
Taxonomy filter	. . . . . . Mycoplasma
Enzyme	semiTrypsin
Maximum Missed Cleavages	3
Fixed modifications
Variable modifications	Deamidated (NQ),Oxidation (M),Propionamide (C)
Peptide Mass Tolerance	100
Peptide Mass Tolerance Units	ppm
Fragment Mass Tolerance	0.2
Fragment Mass Tolerance Units	Da
Mass values	Monoisotopic
Instrument type	ESI-QUAD-TOF
Format parameters	--------------------------------------------------------
Significance threshold	0.05
Max. number of hits	0
Use MudPIT protein scoring	1
Ions score cut-off	0
Include same-set proteins	0
Include sub-set proteins	0
Include unassigned	0
Require bold red	1
Use homology threshold	0
Group protein families	0
Protein hits	--------------------------------------------------------
prot_hit_num	prot_acc	prot_desc	prot_score	prot_mass	prot_matches	prot_matches_sig	prot_sequences	prot_sequences_sig	pep_query	pep_rank	pep_isbold	pep_isunique	pep_exp_mz	pep_exp_mr	pep_exp_z	pep_calc_mr	pep_delta	pep_miss	pep_score	pep_expect	pep_res_before	pep_seq	pep_res_after	pep_var_mod	pep_var_mod_pos	pep_summed_mod_pos	pep_scan_title
3	2::WP_038534367.1	ref|WP_038534367.1| Mgp-operon protein 3 n=2 Tax_Id=2104 [Mycoplasma pneumoniae]	751	130466	29	21	26	19	55	2	1	1	374.201	746.387	2	746.4	-0.0127	0	31.38	6.4	R	AMLVGEK	T				File: MPN ACTIN_4.wiff, Sample: 20140808 MPN ACTIN_4 (sample number 1), Elution: 26.28 to 26.923 min, Period: 1, Cycle(s): 4372, 4378 (Experiment 2), 4366, 4384 (Experiment 4)
3	2::WP_038534367.1	ref|WP_038534367.1| Mgp-operon protein 3 n=2 Tax_Id=2104 [Mycoplasma pneumoniae]	751	130466	29	21	26	19	161	1	1	1	424.195	846.376	2	846.398	-0.0227	0	28.76	9.2	T	PAFDNQR	A				File: MPN ACTIN_4.wiff, Sample: 20140808 MPN ACTIN_4 (sample number 1), Elution: 30.269 to 30.398 min, Period: 1, Cycle(s): 4506 (Experiment 2), 4511 (Experiment 3)
3	2::WP_038534367.1	ref|WP_038534367.1| Mgp-operon protein 3 n=2 Tax_Id=2104 [Mycoplasma pneumoniae]	751	130466	29	21	26	19	236	1	1	1	456.269	910.524	2	910.56	-0.0361	0	46.94	0.072	A	VTVVAGPLR	A				File: MPN ACTIN_4.wiff, Sample: 20140808 MPN ACTIN_4 (sample number 1), Elution: 31.293 to 31.475 min, Period: 1, Cycle(s): 4547, 4555 (Experiment 2)
3	2::WP_038534367.1	ref|WP_038534367.1| Mgp-operon protein 3 n=2 Tax_Id=2104 [Mycoplasma pneumoniae]	751	130466	29	21	26	19	303	1	1	1	476.75	951.486	2	951.514	-0.0275	0	65.25	0.002	K	AGVDPAPVAR	G				File: MPN ACTIN_4.wiff, Sample: 20140808 MPN ACTIN_4 (sample number 1), Elution: 24.897 to 25.253 min, Period: 1, Cycle(s): 4328 (Experiment 2), 4320, 4335 (Experiment 3)
3	2::WP_038534367.1	ref|WP_038534367.1| Mgp-operon protein 3 n=2 Tax_Id=2104 [Mycoplasma pneumoniae]	751	130466	29	21	26	19	318	1	1	1	483.261	964.508	2	964.534	-0.0266	0	47.07	0.15	K	GYAVITVSR	T				File: MPN ACTIN_4.wiff, Sample: 20140808 MPN ACTIN_4 (sample number 1), Elution: 31.444 to 31.641 min, Period: 1, Cycle(s): 4553, 4561 (Experiment 3)
3	2::WP_038534367.1	ref|WP_038534367.1| Mgp-operon protein 3 n=2 Tax_Id=2104 [Mycoplasma pneumoniae]	751	130466	29	21	26	19	342	1	1	1	491.792	981.569	2	981.597	-0.0285	0	51.05	0.029	R	AVTVVAGPLR	A				File: MPN ACTIN_4.wiff, Sample: 20140808 MPN ACTIN_4 (sample number 1), Elution: 32.176 min, Period: 1, Cycle(s): 4583 (Experiment 3)
3	2::WP_038534367.1	ref|WP_038534367.1| Mgp-operon protein 3 n=2 Tax_Id=2104 [Mycoplasma pneumoniae]	751	130466	29	21	26	19	383	1	1	1	501.798	1001.58	2	1001.61	-0.0316	0	40.81	0.61	K	IITQTSVIK	K				File: MPN ACTIN_4.wiff, Sample: 20140808 MPN ACTIN_4 (sample number 1), Elution: 29.648 to 29.815 min, Period: 1, Cycle(s): 4487 (Experiment 3), 4481 (Experiment 4)
3	2::WP_038534367.1	ref|WP_038534367.1| Mgp-operon protein 3 n=2 Tax_Id=2104 [Mycoplasma pneumoniae]	751	130466	29	21	26	19	451	2	1	1	524.245	1046.47	2	1046.49	-0.0133	0	39.39	0.82	K	DDQLSENVK	R				File: MPN ACTIN_4.wiff, Sample: 20140808 MPN ACTIN_4 (sample number 1), Elution: 24.219 min, Period: 1, Cycle(s): 4302 (Experiment 2)
3	2::WP_038534367.1	ref|WP_038534367.1| Mgp-operon protein 3 n=2 Tax_Id=2104 [Mycoplasma pneumoniae]	751	130466	29	21	26	19	477	1	1	1	532.243	1062.47	2	1062.5	-0.0267	0	53.01	0.034	R	LNFNPDTDK	L				File: MPN ACTIN_4.wiff, Sample: 20140808 MPN ACTIN_4 (sample number 1), Elution: 29.391 to 29.584 min, Period: 1, Cycle(s): 4472, 4479 (Experiment 2)
3	2::WP_038534367.1	ref|WP_038534367.1| Mgp-operon protein 3 n=2 Tax_Id=2104 [Mycoplasma pneumoniae]	751	130466	29	21	26	19	525	1	1	1	547.309	1092.6	2	1092.63	-0.0255	1	31.11	6.1	R	KGYAVITVSR	T				File: MPN ACTIN_4.wiff, Sample: 20140808 MPN ACTIN_4 (sample number 1), Elution: 29.953 to 30.51 min, Period: 1, Cycle(s): 4501, 4508 (Experiment 2), 4493, 4516 (Experiment 3), 4500 (Experiment 4)
3	2::WP_038534367.1	ref|WP_038534367.1| Mgp-operon protein 3 n=2 Tax_Id=2104 [Mycoplasma pneumoniae]	751	130466	29	21	26	19	718	1	1	0	605.299	1208.58	2	1208.62	-0.0362	0	72	0.00053	K	QFVENQLGFK	D				File: MPN ACTIN_4.wiff, Sample: 20140808 MPN ACTIN_4 (sample number 1), Elution: 36.072 to 36.267 min, Period: 1, Cycle(s): 4738 (Experiment 2), 4745 (Experiment 3)
3	2::WP_038534367.1	ref|WP_038534367.1| Mgp-operon protein 3 n=2 Tax_Id=2104 [Mycoplasma pneumoniae]	751	130466	29	21	26	19	833	1	1	1	645.826	1289.64	2	1289.67	-0.036	0	87.65	1.6e-05	R	VDFAANSVLQAR	N				File: MPN ACTIN_4.wiff, Sample: 20140808 MPN ACTIN_4 (sample number 1), Elution: 36.346 to 36.513 min, Period: 1, Cycle(s): 4749, 4756 (Experiment 2)
3	2::WP_038534367.1	ref|WP_038534367.1| Mgp-operon protein 3 n=2 Tax_Id=2104 [Mycoplasma pneumoniae]	751	130466	29	21	26	19	835	1	1	1	646.314	1290.61	2	1290.66	-0.043	0	92.3	5.5e-06	R	VDFAANSVLQAR	N	Deamidated (NQ)	0.000001000000.0		File: MPN ACTIN_4.wiff, Sample: 20140808 MPN ACTIN_4 (sample number 1), Elution: 37.443 min, Period: 1, Cycle(s): 4795 (Experiment 4)
3	2::WP_038534367.1	ref|WP_038534367.1| Mgp-operon protein 3 n=2 Tax_Id=2104 [Mycoplasma pneumoniae]	751	130466	29	21	26	19	836	1	1	1	646.321	1290.63	2	1290.66	-0.0286	0	61.59	0.0067	R	VDFAANSVLQAR	N	Deamidated (NQ)	0.000001000000.0		File: MPN ACTIN_4.wiff, Sample: 20140808 MPN ACTIN_4 (sample number 1), Elution: 35.192 min, Period: 1, Cycle(s): 4699 (Experiment 3)
3	2::WP_038534367.1	ref|WP_038534367.1| Mgp-operon protein 3 n=2 Tax_Id=2104 [Mycoplasma pneumoniae]	751	130466	29	21	26	19	915	1	1	0	677.347	1352.68	2	1352.72	-0.0383	0	84.71	3e-05	K	VDTLTTAVGSVYK	K				File: MPN ACTIN_4.wiff, Sample: 20140808 MPN ACTIN_4 (sample number 1), Elution: 36.241 min, Period: 1, Cycle(s): 4744 (Experiment 4)
3	2::WP_038534367.1	ref|WP_038534367.1| Mgp-operon protein 3 n=2 Tax_Id=2104 [Mycoplasma pneumoniae]	751	130466	29	21	26	19	959	1	1	0	694.802	1387.59	2	1387.62	-0.0267	0	80.73	5.1e-05	Y	YYSANFPEAGNR	R				File: MPN ACTIN_4.wiff, Sample: 20140808 MPN ACTIN_4 (sample number 1), Elution: 31.129 min, Period: 1, Cycle(s): 4539 (Experiment 4)
3	2::WP_038534367.1	ref|WP_038534367.1| Mgp-operon protein 3 n=2 Tax_Id=2104 [Mycoplasma pneumoniae]	751	130466	29	21	26	19	985	1	1	1	706.877	1411.74	2	1411.78	-0.0435	0	70.9	0.00073	K	IAGIPLNIDFPSR	I				File: MPN ACTIN_4.wiff, Sample: 20140808 MPN ACTIN_4 (sample number 1), Elution: 40.744 min, Period: 1, Cycle(s): 4953 (Experiment 2)
3	2::WP_038534367.1	ref|WP_038534367.1| Mgp-operon protein 3 n=2 Tax_Id=2104 [Mycoplasma pneumoniae]	751	130466	29	21	26	19	1029	1	1	1	485.272	1452.79	3	1452.82	-0.0275	0	93.15	4.2e-06	R	GHKPNYSAVLLVR	G				File: MPN ACTIN_4.wiff, Sample: 20140808 MPN ACTIN_4 (sample number 1), Elution: 34.847 to 35.025 min, Period: 1, Cycle(s): 4684, 4692 (Experiment 2)
3	2::WP_038534367.1	ref|WP_038534367.1| Mgp-operon protein 3 n=2 Tax_Id=2104 [Mycoplasma pneumoniae]	751	130466	29	21	26	19	1059	1	1	0	741.394	1480.77	2	1480.81	-0.0411	1	87.9	1.5e-05	K	KVDTLTTAVGSVYK	K				File: MPN ACTIN_4.wiff, Sample: 20140808 MPN ACTIN_4 (sample number 1), Elution: 34.426 min, Period: 1, Cycle(s): 4667 (Experiment 3)
3	2::WP_038534367.1	ref|WP_038534367.1| Mgp-operon protein 3 n=2 Tax_Id=2104 [Mycoplasma pneumoniae]	751	130466	29	21	26	19	1211	1	1	1	825.354	1648.69	2	1648.73	-0.0327	0	79.49	8.1e-05	K	IEYLDGNFYGEDSK	I				File: MPN ACTIN_4.wiff, Sample: 20140808 MPN ACTIN_4 (sample number 1), Elution: 37.022 to 37.385 min, Period: 1, Cycle(s): 4777, 4785 (Experiment 2), 4793 (Experiment 3)
3	2::WP_038534367.1	ref|WP_038534367.1| Mgp-operon protein 3 n=2 Tax_Id=2104 [Mycoplasma pneumoniae]	751	130466	29	21	26	19	1276	1	1	1	875.89	1749.77	2	1749.82	-0.0514	0	114.78	3.1e-08	K	GGSQNNEEVQTTYPVK	S				File: MPN ACTIN_4.wiff, Sample: 20140808 MPN ACTIN_4 (sample number 1), Elution: 27.348 to 27.846 min, Period: 1, Cycle(s): 4399, 4406 (Experiment 2), 4413, 4417 (Experiment 4)
3	2::WP_038534367.1	ref|WP_038534367.1| Mgp-operon protein 3 n=2 Tax_Id=2104 [Mycoplasma pneumoniae]	751	130466	29	21	26	19	1321	1	1	0	910.96	1819.91	2	1819.96	-0.0516	0	80.82	9.7e-05	R	TDQLLVYGIVNESELK	S				File: MPN ACTIN_4.wiff, Sample: 20140808 MPN ACTIN_4 (sample number 1), Elution: 40.715 min, Period: 1, Cycle(s): 4951 (Experiment 3)
3	2::WP_038534367.1	ref|WP_038534367.1| Mgp-operon protein 3 n=2 Tax_Id=2104 [Mycoplasma pneumoniae]	751	130466	29	21	26	19	1326	1	1	1	612.623	1834.85	3	1834.89	-0.0489	1	63.15	0.0053	R	LNFNPDTDKLLDSTDK	N				File: MPN ACTIN_4.wiff, Sample: 20140808 MPN ACTIN_4 (sample number 1), Elution: 37.375 min, Period: 1, Cycle(s): 4793 (Experiment 2)
3	2::WP_038534367.1	ref|WP_038534367.1| Mgp-operon protein 3 n=2 Tax_Id=2104 [Mycoplasma pneumoniae]	751	130466	29	21	26	19	1362	1	1	1	640.364	1918.07	3	1918.12	-0.0452	0	53.2	0.051	K	APVKPAAPTAPRPPVQPPK	K				File: MPN ACTIN_4.wiff, Sample: 20140808 MPN ACTIN_4 (sample number 1), Elution: 29.007 to 29.679 min, Period: 1, Cycle(s): 4463, 4469, 4476, 4483 (Experiment 2), 4457 (Experiment 4)
3	2::WP_038534367.1	ref|WP_038534367.1| Mgp-operon protein 3 n=2 Tax_Id=2104 [Mycoplasma pneumoniae]	751	130466	29	21	26	19	1372	1	1	1	650.965	1949.87	3	1949.93	-0.0593	1	32.48	6.1	K	NTNGLFEKDDQLSENVK	R				File: MPN ACTIN_4.wiff, Sample: 20140808 MPN ACTIN_4 (sample number 1), Elution: 33.513 min, Period: 1, Cycle(s): 4631 (Experiment 4)
3	2::WP_038534367.1	ref|WP_038534367.1| Mgp-operon protein 3 n=2 Tax_Id=2104 [Mycoplasma pneumoniae]	751	130466	29	21	26	19	1373	1	1	1	651.294	1950.86	3	1950.92	-0.0577	1	62.96	0.0052	K	NTNGLFEKDDQLSENVK	R	Deamidated (NQ)	0.00100000000000000.0		File: MPN ACTIN_4.wiff, Sample: 20140808 MPN ACTIN_4 (sample number 1), Elution: 33.898 to 34.308 min, Period: 1, Cycle(s): 4647 (Experiment 3), 4655, 4662 (Experiment 4)
3	2::WP_038534367.1	ref|WP_038534367.1| Mgp-operon protein 3 n=2 Tax_Id=2104 [Mycoplasma pneumoniae]	751	130466	29	21	26	19	1383	1	1	1	989.983	1977.95	2	1978	-0.0537	0	84.7	4.1e-05	K	TVDEVINNPDILQSFFK	F				File: MPN ACTIN_4.wiff, Sample: 20140808 MPN ACTIN_4 (sample number 1), Elution: 41.412 min, Period: 1, Cycle(s): 4987 (Experiment 2)
3	2::WP_038534367.1	ref|WP_038534367.1| Mgp-operon protein 3 n=2 Tax_Id=2104 [Mycoplasma pneumoniae]	751	130466	29	21	26	19	1407	1	1	0	686.631	2056.87	3	2056.93	-0.0627	1	65.65	0.0023	K	QFVENQLGFKDDSNSDSK	N				File: MPN ACTIN_4.wiff, Sample: 20140808 MPN ACTIN_4 (sample number 1), Elution: 33.005 to 33.371 min, Period: 1, Cycle(s): 4613, 4619 (Experiment 2), 4626 (Experiment 4)
3	2::WP_038534367.1	ref|WP_038534367.1| Mgp-operon protein 3 n=2 Tax_Id=2104 [Mycoplasma pneumoniae]	751	130466	29	21	26	19	1490	1	1	1	828.741	2483.2	3	2483.25	-0.0543	0	61.16	0.01	K	ISTLESQATDGFANSLLNFGTGLK	A				File: MPN ACTIN_4.wiff, Sample: 20140808 MPN ACTIN_4 (sample number 1), Elution: 41.369 to 41.441 min, Period: 1, Cycle(s): 4988 (Experiment 3), 4984 (Experiment 4)
Found in gel mass range 60-75 kDa
Peak list data path	C:\Analyst Data\Projects\Mpn\20140809 Actin MPN\MPN ACTIN_5.wiff
Peak list format	Mascot generic
Search type	MIS
Mascot version	2.4.1
Database	1::contaminants 2::MSPnr100
Fasta file	1::contaminants_all_10062014.fasta 2::MSPnr100_Q215.fasta
Total sequences	68277407
Total residues	24208969539
Sequences after taxonomy filter	102795
Number of queries	1540
Warning	No taxonomy indexes for contaminants, taxonomy ~Mycoplasma~ ignored. Searching all entries in contaminants
Variable modifications	--------------------------------------------------------
Identifier	Name	Delta	Neutral loss(es)
1	Deamidated (NQ)	0.984016
2	Oxidation (M)	15.9949	0	63.9983
3	Propionamide (C)	71.0371
Search Parameters	--------------------------------------------------------
Taxonomy filter	. . . . . . Mycoplasma
Enzyme	semiTrypsin
Maximum Missed Cleavages	3
Fixed modifications
Variable modifications	Deamidated (NQ),Oxidation (M),Propionamide (C)
Peptide Mass Tolerance	100
Peptide Mass Tolerance Units	ppm
Fragment Mass Tolerance	0.2
Fragment Mass Tolerance Units	Da
Mass values	Monoisotopic
Instrument type	ESI-QUAD-TOF
Format parameters	--------------------------------------------------------
Significance threshold	0.05
Max. number of hits	0
Use MudPIT protein scoring	1
Ions score cut-off	0
Include same-set proteins	0
Include sub-set proteins	0
Include unassigned	0
Require bold red	1
Use homology threshold	0
Group protein families	0
Protein hits	--------------------------------------------------------
prot_hit_num	prot_acc	prot_desc	prot_score	prot_mass	prot_matches	prot_matches_sig	prot_sequences	prot_sequences_sig	pep_query	pep_rank	pep_isbold	pep_isunique	pep_exp_mz	pep_exp_mr	pep_exp_z	pep_calc_mr	pep_delta	pep_miss	pep_score	pep_expect	pep_res_before	pep_seq	pep_res_after	pep_var_mod	pep_var_mod_pos	pep_summed_mod_pos	pep_scan_title
9	2::WP_038534367.1	ref|WP_038534367.1| Mgp-operon protein 3 n=2 Tax_Id=2104 [Mycoplasma pneumoniae]	397	130466	17	9	16	9	278	1	1	1	456.271	910.528	2	910.56	-0.032	0	37.89	0.56	A	VTVVAGPLR	A				File: MPN ACTIN_5.wiff, Sample: 20140808 MPN ACTIN_5 (sample number 1), Elution: 31.239 min, Period: 1, Cycle(s): 4575 (Experiment 4)
9	2::WP_038534367.1	ref|WP_038534367.1| Mgp-operon protein 3 n=2 Tax_Id=2104 [Mycoplasma pneumoniae]	397	130466	17	9	16	9	346	1	1	1	476.748	951.482	2	951.514	-0.0316	0	65.05	0.0021	K	AGVDPAPVAR	G				File: MPN ACTIN_5.wiff, Sample: 20140808 MPN ACTIN_5 (sample number 1), Elution: 24.51 to 24.69 min, Period: 1, Cycle(s): 4346, 4352 (Experiment 2)
9	2::WP_038534367.1	ref|WP_038534367.1| Mgp-operon protein 3 n=2 Tax_Id=2104 [Mycoplasma pneumoniae]	397	130466	17	9	16	9	393	1	1	1	491.792	981.569	2	981.597	-0.0285	0	44	0.15	R	AVTVVAGPLR	A				File: MPN ACTIN_5.wiff, Sample: 20140808 MPN ACTIN_5 (sample number 1), Elution: 32.207 min, Period: 1, Cycle(s): 4613 (Experiment 3)
9	2::WP_038534367.1	ref|WP_038534367.1| Mgp-operon protein 3 n=2 Tax_Id=2104 [Mycoplasma pneumoniae]	397	130466	17	9	16	9	545	1	1	1	532.241	1062.47	2	1062.5	-0.0311	0	59.41	0.0075	R	LNFNPDTDK	L				File: MPN ACTIN_5.wiff, Sample: 20140808 MPN ACTIN_5 (sample number 1), Elution: 29.05 min, Period: 1, Cycle(s): 4492 (Experiment 2)
9	2::WP_038534367.1	ref|WP_038534367.1| Mgp-operon protein 3 n=2 Tax_Id=2104 [Mycoplasma pneumoniae]	397	130466	17	9	16	9	591	1	1	1	548.246	1094.48	2	1094.51	-0.0364	0	45.75	0.17	K	FTPAFDNQR	A				File: MPN ACTIN_5.wiff, Sample: 20140808 MPN ACTIN_5 (sample number 1), Elution: 29.847 to 30.012 min, Period: 1, Cycle(s): 4526 (Experiment 3), 4520-4521 (Experiment 4)
9	2::WP_038534367.1	ref|WP_038534367.1| Mgp-operon protein 3 n=2 Tax_Id=2104 [Mycoplasma pneumoniae]	397	130466	17	9	16	9	770	1	1	1	595.819	1189.62	2	1189.66	-0.0316	0	77.34	0.00017	K	TSDTTLTVKPK	I				File: MPN ACTIN_5.wiff, Sample: 20140808 MPN ACTIN_5 (sample number 1), Elution: 24.535 to 24.72 min, Period: 1, Cycle(s): 4346, 4352 (Experiment 4)
9	2::WP_038534367.1	ref|WP_038534367.1| Mgp-operon protein 3 n=2 Tax_Id=2104 [Mycoplasma pneumoniae]	397	130466	17	9	16	9	812	1	1	0	605.303	1208.59	2	1208.62	-0.0268	0	43.28	0.39	K	QFVENQLGFK	D				File: MPN ACTIN_5.wiff, Sample: 20140808 MPN ACTIN_5 (sample number 1), Elution: 35.9 min, Period: 1, Cycle(s): 4765 (Experiment 4)
9	2::WP_038534367.1	ref|WP_038534367.1| Mgp-operon protein 3 n=2 Tax_Id=2104 [Mycoplasma pneumoniae]	397	130466	17	9	16	9	938	1	1	1	645.826	1289.64	2	1289.67	-0.036	0	83.89	3.9e-05	R	VDFAANSVLQAR	N				File: MPN ACTIN_5.wiff, Sample: 20140808 MPN ACTIN_5 (sample number 1), Elution: 36.149 to 36.324 min, Period: 1, Cycle(s): 4783 (Experiment 3), 4775 (Experiment 4)
9	2::WP_038534367.1	ref|WP_038534367.1| Mgp-operon protein 3 n=2 Tax_Id=2104 [Mycoplasma pneumoniae]	397	130466	17	9	16	9	941	1	1	1	646.321	1290.63	2	1290.66	-0.0286	0	20.64	83	R	VDFAANSVLQAR	N	Deamidated (NQ)	0.000001000000.0		File: MPN ACTIN_5.wiff, Sample: 20140808 MPN ACTIN_5 (sample number 1), Elution: 34.925 min, Period: 1, Cycle(s): 4723 (Experiment 4)
9	2::WP_038534367.1	ref|WP_038534367.1| Mgp-operon protein 3 n=2 Tax_Id=2104 [Mycoplasma pneumoniae]	397	130466	17	9	16	9	1078	1	1	1	706.879	1411.74	2	1411.78	-0.0384	0	57.5	0.016	K	IAGIPLNIDFPSR	I				File: MPN ACTIN_5.wiff, Sample: 20140808 MPN ACTIN_5 (sample number 1), Elution: 40.616 min, Period: 1, Cycle(s): 4976 (Experiment 3)
9	2::WP_038534367.1	ref|WP_038534367.1| Mgp-operon protein 3 n=2 Tax_Id=2104 [Mycoplasma pneumoniae]	397	130466	17	9	16	9	1129	1	1	1	485.265	1452.77	3	1452.82	-0.0463	0	49.89	0.092	R	GHKPNYSAVLLVR	G				File: MPN ACTIN_5.wiff, Sample: 20140808 MPN ACTIN_5 (sample number 1), Elution: 35.034 min, Period: 1, Cycle(s): 4728 (Experiment 3)
9	2::WP_038534367.1	ref|WP_038534367.1| Mgp-operon protein 3 n=2 Tax_Id=2104 [Mycoplasma pneumoniae]	397	130466	17	9	16	9	1311	1	1	1	825.348	1648.68	2	1648.73	-0.0435	0	89.83	6.8e-06	K	IEYLDGNFYGEDSK	I				File: MPN ACTIN_5.wiff, Sample: 20140808 MPN ACTIN_5 (sample number 1), Elution: 36.873 to 37.062 min, Period: 1, Cycle(s): 4805 (Experiment 2), 4812 (Experiment 4)
9	2::WP_038534367.1	ref|WP_038534367.1| Mgp-operon protein 3 n=2 Tax_Id=2104 [Mycoplasma pneumoniae]	397	130466	17	9	16	9	1348	1	1	1	875.89	1749.77	2	1749.82	-0.0514	0	115.37	2.7e-08	K	GGSQNNEEVQTTYPVK	S				File: MPN ACTIN_5.wiff, Sample: 20140808 MPN ACTIN_5 (sample number 1), Elution: 26.838 to 27.031 min, Period: 1, Cycle(s): 4415 (Experiment 2), 4421 (Experiment 4)
9	2::WP_038534367.1	ref|WP_038534367.1| Mgp-operon protein 3 n=2 Tax_Id=2104 [Mycoplasma pneumoniae]	397	130466	17	9	16	9	1377	1	1	1	910.96	1819.91	2	1819.96	-0.0516	0	80.86	9.6e-05	R	TDQLLVYGIVNESELK	S				File: MPN ACTIN_5.wiff, Sample: 20140808 MPN ACTIN_5 (sample number 1), Elution: 40.597 min, Period: 1, Cycle(s): 4975 (Experiment 3)
9	2::WP_038534367.1	ref|WP_038534367.1| Mgp-operon protein 3 n=2 Tax_Id=2104 [Mycoplasma pneumoniae]	397	130466	17	9	16	9	1384	1	1	1	612.627	1834.86	3	1834.89	-0.0348	1	54.15	0.043	R	LNFNPDTDKLLDSTDK	N				File: MPN ACTIN_5.wiff, Sample: 20140808 MPN ACTIN_5 (sample number 1), Elution: 37.242 min, Period: 1, Cycle(s): 4821 (Experiment 2)
9	2::WP_038534367.1	ref|WP_038534367.1| Mgp-operon protein 3 n=2 Tax_Id=2104 [Mycoplasma pneumoniae]	397	130466	17	9	16	9	1412	1	1	1	640.361	1918.06	3	1918.12	-0.0524	0	52.92	0.055	K	APVKPAAPTAPRPPVQPPK	K				File: MPN ACTIN_5.wiff, Sample: 20140808 MPN ACTIN_5 (sample number 1), Elution: 29.106 to 29.293 min, Period: 1, Cycle(s): 4493, 4499 (Experiment 4)
9	2::WP_038534367.1	ref|WP_038534367.1| Mgp-operon protein 3 n=2 Tax_Id=2104 [Mycoplasma pneumoniae]	397	130466	17	9	16	9	1497	1	1	1	828.738	2483.19	3	2483.25	-0.0624	0	52.99	0.066	K	ISTLESQATDGFANSLLNFGTGLK	A				File: MPN ACTIN_5.wiff, Sample: 20140808 MPN ACTIN_5 (sample number 1), Elution: 41.25 min, Period: 1, Cycle(s): 5006 (Experiment 4)
Found in gel mass range 33-40 kDa
Peak list data path	C:\Analyst Data\Projects\Mpn\20140809 Actin MPN\MPN ACTIN_8.wiff
Peak list format	Mascot generic
Search type	MIS
Mascot version	2.4.1
Database	1::contaminants 2::MSPnr100
Fasta file	1::contaminants_all_10062014.fasta 2::MSPnr100_Q215.fasta
Total sequences	68277407
Total residues	24208969539
Sequences after taxonomy filter	102795
Number of queries	1500
Warning	No taxonomy indexes for contaminants, taxonomy ~Mycoplasma~ ignored. Searching all entries in contaminants
Variable modifications	--------------------------------------------------------
Identifier	Name	Delta	Neutral loss(es)
1	Deamidated (NQ)	0.984016
2	Oxidation (M)	15.9949	0	63.9983
3	Propionamide (C)	71.0371
Search Parameters	--------------------------------------------------------
Taxonomy filter	. . . . . . Mycoplasma
Enzyme	semiTrypsin
Maximum Missed Cleavages	3
Fixed modifications
Variable modifications	Deamidated (NQ),Oxidation (M),Propionamide (C)
Peptide Mass Tolerance	100
Peptide Mass Tolerance Units	ppm
Fragment Mass Tolerance	0.2
Fragment Mass Tolerance Units	Da
Mass values	Monoisotopic
Instrument type	ESI-QUAD-TOF
Format parameters	--------------------------------------------------------
Significance threshold	0.05
Max. number of hits	0
Use MudPIT protein scoring	1
Ions score cut-off	0
Include same-set proteins	0
Include sub-set proteins	0
Include unassigned	0
Require bold red	1
Use homology threshold	0
Group protein families	0
Protein hits	--------------------------------------------------------
prot_hit_num	prot_acc	prot_desc	prot_score	prot_mass	prot_matches	prot_matches_sig	prot_sequences	prot_sequences_sig	pep_query	pep_rank	pep_isbold	pep_isunique	pep_exp_mz	pep_exp_mr	pep_exp_z	pep_calc_mr	pep_delta	pep_miss	pep_score	pep_expect	pep_res_before	pep_seq	pep_res_after	pep_var_mod	pep_var_mod_pos	pep_summed_mod_pos	pep_scan_title
3	2::WP_038534367.1	ref|WP_038534367.1| Mgp-operon protein 3 n=2 Tax_Id=2104 [Mycoplasma pneumoniae]	469	130466	23	11	18	11	117	1	1	1	402.243	802.472	2	802.495	-0.0236	0	36.25	1.7	K	LALPYVK	Q				File: MPN ACTIN_8.wiff, Sample: 20140808 MPN ACTIN_8 (sample number 1), Elution: 35.536 to 36.132 min, Period: 1, Cycle(s): 4483 (Experiment 2), 4477 (Experiment 3), 4470, 4490 (Experiment 4)
3	2::WP_038534367.1	ref|WP_038534367.1| Mgp-operon protein 3 n=2 Tax_Id=2104 [Mycoplasma pneumoniae]	469	130466	23	11	18	11	263	1	1	1	454.721	907.428	2	907.455	-0.0267	0	43.32	0.35	R	ATWVFER	K				File: MPN ACTIN_8.wiff, Sample: 20140808 MPN ACTIN_8 (sample number 1), Elution: 35.836 to 36.197 min, Period: 1, Cycle(s): 4487 (Experiment 2), 4481, 4492 (Experiment 3)
3	2::WP_038534367.1	ref|WP_038534367.1| Mgp-operon protein 3 n=2 Tax_Id=2104 [Mycoplasma pneumoniae]	469	130466	23	11	18	11	523	2	1	1	548.765	1095.52	2	1095.54	-0.029	0	32.42	3.8	L	SDEFSAVITK	D				File: MPN ACTIN_8.wiff, Sample: 20140808 MPN ACTIN_8 (sample number 1), Elution: 31.666 min, Period: 1, Cycle(s): 4345 (Experiment 2)
3	2::WP_038534367.1	ref|WP_038534367.1| Mgp-operon protein 3 n=2 Tax_Id=2104 [Mycoplasma pneumoniae]	469	130466	23	11	18	11	748	2	1	1	621.807	1241.6	2	1241.66	-0.0622	0	34.96	2.4	F	TTPLNGGLDVVR	A	Deamidated (NQ)	0.000010000000.0		File: MPN ACTIN_8.wiff, Sample: 20140808 MPN ACTIN_8 (sample number 1), Elution: 35.619 to 35.814 min, Period: 1, Cycle(s): 4480 (Experiment 3), 4473 (Experiment 4)
3	2::WP_038534367.1	ref|WP_038534367.1| Mgp-operon protein 3 n=2 Tax_Id=2104 [Mycoplasma pneumoniae]	469	130466	23	11	18	11	749	1	1	1	621.819	1241.62	2	1241.66	-0.0386	0	53.5	0.036	F	TTPLNGGLDVVR	A	Deamidated (NQ)	0.000010000000.0		File: MPN ACTIN_8.wiff, Sample: 20140808 MPN ACTIN_8 (sample number 1), Elution: 33.182 to 33.368 min, Period: 1, Cycle(s): 4391 (Experiment 3), 4397 (Experiment 4)
3	2::WP_038534367.1	ref|WP_038534367.1| Mgp-operon protein 3 n=2 Tax_Id=2104 [Mycoplasma pneumoniae]	469	130466	23	11	18	11	870	5	1	1	664.303	1326.59	2	1326.68	-0.0903	1	26.35	15	D	IYKNTNGLFEK	D	Deamidated (NQ)	0.00000100000.0		File: MPN ACTIN_8.wiff, Sample: 20140808 MPN ACTIN_8 (sample number 1), Elution: 41.39 min, Period: 1, Cycle(s): 4709 (Experiment 2)
3	2::WP_038534367.1	ref|WP_038534367.1| Mgp-operon protein 3 n=2 Tax_Id=2104 [Mycoplasma pneumoniae]	469	130466	23	11	18	11	986	8	1	1	706.882	1411.75	2	1411.83	-0.081	1	12.77	470	A	PTAPRPPVQPPKK	A				File: MPN ACTIN_8.wiff, Sample: 20140808 MPN ACTIN_8 (sample number 1), Elution: 37.496 to 37.751 min, Period: 1, Cycle(s): 4540, 4547 (Experiment 2), 4549 (Experiment 3)
3	2::WP_038534367.1	ref|WP_038534367.1| Mgp-operon protein 3 n=2 Tax_Id=2104 [Mycoplasma pneumoniae]	469	130466	23	11	18	11	1171	2	1	1	831.37	1660.73	2	1660.76	-0.036	0	9.81	890	K	TTAENDAPLVGMVGSGAA	G	Deamidated (NQ)	0.000010000000000000.0		File: MPN ACTIN_8.wiff, Sample: 20140808 MPN ACTIN_8 (sample number 1), Elution: 37.937 to 38.231 min, Period: 1, Cycle(s): 4562 (Experiment 2), 4569 (Experiment 3), 4557 (Experiment 4)
3	2::WP_038534367.1	ref|WP_038534367.1| Mgp-operon protein 3 n=2 Tax_Id=2104 [Mycoplasma pneumoniae]	469	130466	23	11	18	11	1174	1	1	1	555.936	1664.79	3	1664.83	-0.0445	0	61.75	0.0071	R	AAHLHPSYELVDWK	R				File: MPN ACTIN_8.wiff, Sample: 20140808 MPN ACTIN_8 (sample number 1), Elution: 36.868 to 37.066 min, Period: 1, Cycle(s): 4516 (Experiment 2), 4523 (Experiment 3)
3	2::WP_038534367.1	ref|WP_038534367.1| Mgp-operon protein 3 n=2 Tax_Id=2104 [Mycoplasma pneumoniae]	469	130466	23	11	18	11	1179	1	1	1	838.883	1675.75	2	1675.77	-0.0218	0	54.19	0.037	K	TTAENDAPLVGMVGSGAA	G	Oxidation (M)	0.000000000002000000.0		File: MPN ACTIN_8.wiff, Sample: 20140808 MPN ACTIN_8 (sample number 1), Elution: 31.741 to 31.971 min, Period: 1, Cycle(s): 4347 (Experiment 2), 4353 (Experiment 4)
3	2::WP_038534367.1	ref|WP_038534367.1| Mgp-operon protein 3 n=2 Tax_Id=2104 [Mycoplasma pneumoniae]	469	130466	23	11	18	11	1236	1	1	1	889.402	1776.79	2	1776.86	-0.0683	0	60	0.0099	K	LNESWPVYEPLDSTK	E				File: MPN ACTIN_8.wiff, Sample: 20140808 MPN ACTIN_8 (sample number 1), Elution: 39.789 min, Period: 1, Cycle(s): 4632 (Experiment 3)
3	2::WP_038534367.1	ref|WP_038534367.1| Mgp-operon protein 3 n=2 Tax_Id=2104 [Mycoplasma pneumoniae]	469	130466	23	11	18	11	1250	1	1	1	902.9	1803.79	2	1803.83	-0.0454	0	40.11	0.89	K	TTAENDAPLVGMVGSGAAGS	A				File: MPN ACTIN_8.wiff, Sample: 20140808 MPN ACTIN_8 (sample number 1), Elution: 37.154 to 37.31 min, Period: 1, Cycle(s): 4533 (Experiment 2), 4526 (Experiment 4)
3	2::WP_038534367.1	ref|WP_038534367.1| Mgp-operon protein 3 n=2 Tax_Id=2104 [Mycoplasma pneumoniae]	469	130466	23	11	18	11	1260	2	1	1	910.894	1819.77	2	1819.83	-0.0522	0	11.62	560	K	TTAENDAPLVGMVGSGAAGS	A	Oxidation (M)	0.00000000000200000000.0		File: MPN ACTIN_8.wiff, Sample: 20140808 MPN ACTIN_8 (sample number 1), Elution: 30.834 to 31 min, Period: 1, Cycle(s): 4326 (Experiment 2), 4320 (Experiment 3)
3	2::WP_038534367.1	ref|WP_038534367.1| Mgp-operon protein 3 n=2 Tax_Id=2104 [Mycoplasma pneumoniae]	469	130466	23	11	18	11	1303	1	1	1	981.933	1961.85	2	1961.9	-0.0487	0	49.09	0.12	K	TTAENDAPLVGMVGSGAAGSAS	S				File: MPN ACTIN_8.wiff, Sample: 20140808 MPN ACTIN_8 (sample number 1), Elution: 37.02 min, Period: 1, Cycle(s): 4521 (Experiment 4)
3	2::WP_038534367.1	ref|WP_038534367.1| Mgp-operon protein 3 n=2 Tax_Id=2104 [Mycoplasma pneumoniae]	469	130466	23	11	18	11	1310	1	1	1	989.932	1977.85	2	1977.89	-0.0451	0	81.46	6.7e-05	K	TTAENDAPLVGMVGSGAAGSAS	S	Oxidation (M)	0.0000000000020000000000.0		File: MPN ACTIN_8.wiff, Sample: 20140808 MPN ACTIN_8 (sample number 1), Elution: 30.923 min, Period: 1, Cycle(s): 4323 (Experiment 4)
3	2::WP_038534367.1	ref|WP_038534367.1| Mgp-operon protein 3 n=2 Tax_Id=2104 [Mycoplasma pneumoniae]	469	130466	23	11	18	11	1402	1	1	1	764.343	2290.01	3	2290.07	-0.0684	0	51.78	0.074	K	TTAENDAPLVGMVGSGAAGSASSLQ	G				File: MPN ACTIN_8.wiff, Sample: 20140808 MPN ACTIN_8 (sample number 1), Elution: 39.415 min, Period: 1, Cycle(s): 4614 (Experiment 3)
3	2::WP_038534367.1	ref|WP_038534367.1| Mgp-operon protein 3 n=2 Tax_Id=2104 [Mycoplasma pneumoniae]	469	130466	23	11	18	11	1409	1	1	1	769.681	2306.02	3	2306.07	-0.0488	0	53.67	0.049	K	TTAENDAPLVGMVGSGAAGSASSLQ	G	Oxidation (M)	0.0000000000020000000000000.0		File: MPN ACTIN_8.wiff, Sample: 20140808 MPN ACTIN_8 (sample number 1), Elution: 34.692 to 34.873 min, Period: 1, Cycle(s): 4442 (Experiment 3), 4448 (Experiment 4)
3	2::WP_038534367.1	ref|WP_038534367.1| Mgp-operon protein 3 n=2 Tax_Id=2104 [Mycoplasma pneumoniae]	469	130466	23	11	18	11	1420	8	1	1	792.026	2373.06	3	2373.23	-0.1756	1	9.31	1400	D	GFANSLLNFGTGLKAGVDPAPVAR	G	2 Deamidated (NQ)	0.000100010000000000000000.0		File: MPN ACTIN_8.wiff, Sample: 20140808 MPN ACTIN_8 (sample number 1), Elution: 36.965 to 37.22 min, Period: 1, Cycle(s): 4520 (Experiment 2), 4527, 4529 (Experiment 3)
3	2::WP_038534367.1	ref|WP_038534367.1| Mgp-operon protein 3 n=2 Tax_Id=2104 [Mycoplasma pneumoniae]	469	130466	23	11	18	11	1439	1	1	1	830.696	2489.07	3	2489.13	-0.0662	0	65.24	0.0032	R	VNGVAQDTVHFGSGQESSWNSQR	S				File: MPN ACTIN_8.wiff, Sample: 20140808 MPN ACTIN_8 (sample number 1), Elution: 32.601 to 33.249 min, Period: 1, Cycle(s): 4379, 4385, 4394 (Experiment 2), 4372, 4388 (Experiment 3)
3	2::WP_038534367.1	ref|WP_038534367.1| Mgp-operon protein 3 n=2 Tax_Id=2104 [Mycoplasma pneumoniae]	469	130466	23	11	18	11	1478	1	1	1	956.425	2866.25	3	2866.33	-0.0721	0	69.59	0.0013	K	ALNGSQSGSSDTSGSNSQDFASYVLIFK	A				File: MPN ACTIN_8.wiff, Sample: 20140808 MPN ACTIN_8 (sample number 1), Elution: 41.039 to 41.118 min, Period: 1, Cycle(s): 4693, 4696 (Experiment 3), 4692 (Experiment 4)
3	2::WP_038534367.1	ref|WP_038534367.1| Mgp-operon protein 3 n=2 Tax_Id=2104 [Mycoplasma pneumoniae]	469	130466	23	11	18	11	1480	1	1	1	974.403	2920.19	3	2920.26	-0.071	0	92.67	4.6e-06	K	FQDTTSSDQSNTNQNALSFDTQESQK	A				File: MPN ACTIN_8.wiff, Sample: 20140808 MPN ACTIN_8 (sample number 1), Elution: 30.396 to 31.082 min, Period: 1, Cycle(s): 4311, 4319 (Experiment 2), 4304 (Experiment 3), 4328 (Experiment 4)
3	2::WP_038534367.1	ref|WP_038534367.1| Mgp-operon protein 3 n=2 Tax_Id=2104 [Mycoplasma pneumoniae]	469	130466	23	11	18	11	1486	1	1	1	1050.12	3147.34	3	3147.42	-0.0794	1	80.86	9.2e-05	R	VKFQDTTSSDQSNTNQNALSFDTQESQK	A				File: MPN ACTIN_8.wiff, Sample: 20140808 MPN ACTIN_8 (sample number 1), Elution: 31.149 min, Period: 1, Cycle(s): 4330 (Experiment 4)
3	2::WP_038534367.1	ref|WP_038534367.1| Mgp-operon protein 3 n=2 Tax_Id=2104 [Mycoplasma pneumoniae]	469	130466	23	11	18	11	1496	1	1	1	1087.85	3260.52	3	3260.64	-0.1115	0	63.04	0.0066	A	NTYLLQDHNTLTPYTPFTTPLNGGLDVVR	A	Deamidated (NQ)	0.00000000000000000000010000000.0		File: MPN ACTIN_8.wiff, Sample: 20140808 MPN ACTIN_8 (sample number 1), Elution: 40.879 min, Period: 1, Cycle(s): 4685 (Experiment 3)

## Sheet: Fetuin
Found in gel mass range 60-100 kDa
Peak list data path	C:\Analyst Data\Projects\Mpn\20140808 Feutin MPN\Feutin MPN_4.wiff
Peak list format	Mascot generic
Search type	MIS
Mascot version	2.4.1
Database	1::contaminants 2::MSPnr100
Fasta file	1::contaminants_all_10062014.fasta 2::MSPnr100_Q215.fasta
Total sequences	68277407
Total residues	24208969539
Sequences after taxonomy filter	102795
Number of queries	790
Warning	No taxonomy indexes for contaminants, taxonomy ~Mycoplasma~ ignored. Searching all entries in contaminants
Variable modifications	--------------------------------------------------------
Identifier	Name	Delta	Neutral loss(es)
1	Deamidated (NQ)	0.984016
2	Oxidation (M)	15.9949	0	63.9983
3	Propionamide (C)	71.0371
Search Parameters	--------------------------------------------------------
Taxonomy filter	. . . . . . Mycoplasma
Enzyme	semiTrypsin
Maximum Missed Cleavages	3
Fixed modifications
Variable modifications	Deamidated (NQ),Oxidation (M),Propionamide (C)
Peptide Mass Tolerance	100
Peptide Mass Tolerance Units	ppm
Fragment Mass Tolerance	0.2
Fragment Mass Tolerance Units	Da
Mass values	Monoisotopic
Instrument type	ESI-QUAD-TOF
Format parameters	--------------------------------------------------------
Significance threshold	0.05
Max. number of hits	0
Use MudPIT protein scoring	1
Ions score cut-off	0
Include same-set proteins	0
Include sub-set proteins	0
Include unassigned	0
Require bold red	1
Use homology threshold	0
Group protein families	0
Protein hits	--------------------------------------------------------
prot_hit_num		prot_desc	prot_score	prot_mass	prot_matches	prot_matches_sig	prot_sequences	prot_sequences_sig	pep_query	pep_rank	pep_isbold	pep_isunique	pep_exp_mz	pep_exp_mr	pep_exp_z	pep_calc_mr	pep_delta	pep_miss	pep_score	pep_expect	pep_res_before	pep_seq	pep_res_after	pep_var_mod	pep_var_mod_pos	pep_summed_mod_pos	pep_scan_title
4	2::WP_038534367.1	ref|WP_038534367.1| Mgp-operon protein 3 n=2 Tax_Id=2104 [Mycoplasma pneumoniae]	394	130466	23	10	21	9	96	1	1	1	424.197	846.38	2	846.398	-0.0188	0	54.06	0.028	T	PAFDNQR	A				File: Feutin MPN_4.wiff, Sample: 20140807 Feutin MPN_4 (sample number 1), Elution: 40.653 min, Period: 1, Cycle(s): 7485 (Experiment 3)
4	2::WP_038534367.1	ref|WP_038534367.1| Mgp-operon protein 3 n=2 Tax_Id=2104 [Mycoplasma pneumoniae]	394	130466	23	10	21	9	207	1	1	1	476.752	951.49	2	951.514	-0.0233	0	42.41	0.38	K	AGVDPAPVAR	G				File: Feutin MPN_4.wiff, Sample: 20140807 Feutin MPN_4 (sample number 1), Elution: 37.119 min, Period: 1, Cycle(s): 7334 (Experiment 2)
4	2::WP_038534367.1	ref|WP_038534367.1| Mgp-operon protein 3 n=2 Tax_Id=2104 [Mycoplasma pneumoniae]	394	130466	23	10	21	9	208	2	1	1	476.757	951.499	2	951.514	-0.0151	0	29.57	7.2	K	AGVDPAPVAR	G				File: Feutin MPN_4.wiff, Sample: 20140807 Feutin MPN_4 (sample number 1), Elution: 36.932 min, Period: 1, Cycle(s): 7321 (Experiment 2)
4	2::WP_038534367.1	ref|WP_038534367.1| Mgp-operon protein 3 n=2 Tax_Id=2104 [Mycoplasma pneumoniae]	394	130466	23	10	21	9	217	1	1	1	483.261	964.508	2	964.534	-0.0266	0	38.25	1.1	K	GYAVITVSR	T				File: Feutin MPN_4.wiff, Sample: 20140807 Feutin MPN_4 (sample number 1), Elution: 41.182 min, Period: 1, Cycle(s): 7513 (Experiment 2)
4	2::WP_038534367.1	ref|WP_038534367.1| Mgp-operon protein 3 n=2 Tax_Id=2104 [Mycoplasma pneumoniae]	394	130466	23	10	21	9	229	1	1	1	491.794	981.573	2	981.597	-0.0243	0	52.93	0.019	R	AVTVVAGPLR	A				File: Feutin MPN_4.wiff, Sample: 20140807 Feutin MPN_4 (sample number 1), Elution: 41.497 min, Period: 1, Cycle(s): 7529 (Experiment 3)
4	2::WP_038534367.1	ref|WP_038534367.1| Mgp-operon protein 3 n=2 Tax_Id=2104 [Mycoplasma pneumoniae]	394	130466	23	10	21	9	254	1	1	1	501.802	1001.59	2	1001.61	-0.0231	0	50.53	0.062	K	IITQTSVIK	K				File: Feutin MPN_4.wiff, Sample: 20140807 Feutin MPN_4 (sample number 1), Elution: 40.327 min, Period: 1, Cycle(s): 7470 (Experiment 3)
4	2::WP_038534367.1	ref|WP_038534367.1| Mgp-operon protein 3 n=2 Tax_Id=2104 [Mycoplasma pneumoniae]	394	130466	23	10	21	9	300	1	1	1	531.75	1061.48	2	1061.49	-0.0045	0	48.03	0.12	Y	SANFPEAGNR	R				File: Feutin MPN_4.wiff, Sample: 20140807 Feutin MPN_4 (sample number 1), Elution: 37.458 min, Period: 1, Cycle(s): 7349 (Experiment 2)
4	2::WP_038534367.1	ref|WP_038534367.1| Mgp-operon protein 3 n=2 Tax_Id=2104 [Mycoplasma pneumoniae]	394	130466	23	10	21	9	302	1	1	1	532.245	1062.48	2	1062.5	-0.0224	0	46.09	0.17	R	LNFNPDTDK	L				File: Feutin MPN_4.wiff, Sample: 20140807 Feutin MPN_4 (sample number 1), Elution: 40.131 to 40.308 min, Period: 1, Cycle(s): 7463 (Experiment 3), 7469 (Experiment 4)
4	2::WP_038534367.1	ref|WP_038534367.1| Mgp-operon protein 3 n=2 Tax_Id=2104 [Mycoplasma pneumoniae]	394	130466	23	10	21	9	332	1	1	1	547.309	1092.6	2	1092.63	-0.0255	1	36.28	1.9	R	KGYAVITVSR	T				File: Feutin MPN_4.wiff, Sample: 20140807 Feutin MPN_4 (sample number 1), Elution: 40.533 to 40.874 min, Period: 1, Cycle(s): 7485 (Experiment 2), 7479, 7488, 7496 (Experiment 4)
4	2::WP_038534367.1	ref|WP_038534367.1| Mgp-operon protein 3 n=2 Tax_Id=2104 [Mycoplasma pneumoniae]	394	130466	23	10	21	9	433	1	1	1	595.819	1189.62	2	1189.66	-0.0316	0	56.77	0.02	K	TSDTTLTVKPK	I				File: Feutin MPN_4.wiff, Sample: 20140807 Feutin MPN_4 (sample number 1), Elution: 37.029 min, Period: 1, Cycle(s): 7330 (Experiment 2)
4	2::WP_038534367.1	ref|WP_038534367.1| Mgp-operon protein 3 n=2 Tax_Id=2104 [Mycoplasma pneumoniae]	394	130466	23	10	21	9	434	1	1	1	595.824	1189.63	2	1189.66	-0.0224	0	64.79	0.003	K	TSDTTLTVKPK	I				File: Feutin MPN_4.wiff, Sample: 20140807 Feutin MPN_4 (sample number 1), Elution: 36.855 min, Period: 1, Cycle(s): 7313 (Experiment 2)
4	2::WP_038534367.1	ref|WP_038534367.1| Mgp-operon protein 3 n=2 Tax_Id=2104 [Mycoplasma pneumoniae]	394	130466	23	10	21	9	514	1	1	1	428.911	1283.71	3	1283.73	-0.0234	0	19.45	86	A	PTAPRPPVQPPK	K				File: Feutin MPN_4.wiff, Sample: 20140807 Feutin MPN_4 (sample number 1), Elution: 39.888 min, Period: 1, Cycle(s): 7452 (Experiment 3)
4	2::WP_038534367.1	ref|WP_038534367.1| Mgp-operon protein 3 n=2 Tax_Id=2104 [Mycoplasma pneumoniae]	394	130466	23	10	21	9	519	1	1	1	646.319	1290.62	2	1290.66	-0.0334	0	24.6	32	R	VDFAANSVLQAR	N	Deamidated (NQ)	0.000001000000.0		File: Feutin MPN_4.wiff, Sample: 20140807 Feutin MPN_4 (sample number 1), Elution: 41.903 to 42.026 min, Period: 1, Cycle(s): 7558 (Experiment 2), 7551 (Experiment 3)
4	2::WP_038534367.1	ref|WP_038534367.1| Mgp-operon protein 3 n=2 Tax_Id=2104 [Mycoplasma pneumoniae]	394	130466	23	10	21	9	540	1	1	1	660.31	1318.61	2	1318.65	-0.0465	1	35.3	2.6	K	TELNWGTDKQK	Q				File: Feutin MPN_4.wiff, Sample: 20140807 Feutin MPN_4 (sample number 1), Elution: 39.907 min, Period: 1, Cycle(s): 7454 (Experiment 2)
4	2::WP_038534367.1	ref|WP_038534367.1| Mgp-operon protein 3 n=2 Tax_Id=2104 [Mycoplasma pneumoniae]	394	130466	23	10	21	9	599	1	1	1	706.884	1411.75	2	1411.78	-0.0284	0	57.42	0.016	K	IAGIPLNIDFPSR	I				File: Feutin MPN_4.wiff, Sample: 20140807 Feutin MPN_4 (sample number 1), Elution: 43.081 min, Period: 1, Cycle(s): 7613 (Experiment 2)
4	2::WP_038534367.1	ref|WP_038534367.1| Mgp-operon protein 3 n=2 Tax_Id=2104 [Mycoplasma pneumoniae]	394	130466	23	10	21	9	626	1	1	1	727.404	1452.79	2	1452.82	-0.027	0	41.39	0.62	R	GHKPNYSAVLLVR	G				File: Feutin MPN_4.wiff, Sample: 20140807 Feutin MPN_4 (sample number 1), Elution: 41.933 min, Period: 1, Cycle(s): 7553 (Experiment 2)
4	2::WP_038534367.1	ref|WP_038534367.1| Mgp-operon protein 3 n=2 Tax_Id=2104 [Mycoplasma pneumoniae]	394	130466	23	10	21	9	693	1	1	1	825.356	1648.7	2	1648.73	-0.0272	0	83.72	3.1e-05	K	IEYLDGNFYGEDSK	I				File: Feutin MPN_4.wiff, Sample: 20140807 Feutin MPN_4 (sample number 1), Elution: 42.108 min, Period: 1, Cycle(s): 7562 (Experiment 4)
4	2::WP_038534367.1	ref|WP_038534367.1| Mgp-operon protein 3 n=2 Tax_Id=2104 [Mycoplasma pneumoniae]	394	130466	23	10	21	9	716	1	1	1	875.899	1749.78	2	1749.82	-0.0346	0	103.46	4.5e-07	K	GGSQNNEEVQTTYPVK	S				File: Feutin MPN_4.wiff, Sample: 20140807 Feutin MPN_4 (sample number 1), Elution: 38.391 to 38.577 min, Period: 1, Cycle(s): 7391 (Experiment 2), 7397 (Experiment 3)
4	2::WP_038534367.1	ref|WP_038534367.1| Mgp-operon protein 3 n=2 Tax_Id=2104 [Mycoplasma pneumoniae]	394	130466	23	10	21	9	730	1	1	1	910.963	1819.91	2	1819.96	-0.0459	0	93.48	5.3e-06	R	TDQLLVYGIVNESELK	S				File: Feutin MPN_4.wiff, Sample: 20140807 Feutin MPN_4 (sample number 1), Elution: 43.035 min, Period: 1, Cycle(s): 7611 (Experiment 2)
4	2::WP_038534367.1	ref|WP_038534367.1| Mgp-operon protein 3 n=2 Tax_Id=2104 [Mycoplasma pneumoniae]	394	130466	23	10	21	9	742	1	1	1	640.369	1918.08	3	1918.12	-0.0309	0	39.38	1.2	K	APVKPAAPTAPRPPVQPPK	K				File: Feutin MPN_4.wiff, Sample: 20140807 Feutin MPN_4 (sample number 1), Elution: 39.583 to 39.927 min, Period: 1, Cycle(s): 7455 (Experiment 2), 7440, 7447 (Experiment 3)
4	2::WP_038534367.1	ref|WP_038534367.1| Mgp-operon protein 3 n=2 Tax_Id=2104 [Mycoplasma pneumoniae]	394	130466	23	10	21	9	747	1	1	1	976.444	1950.87	2	1950.92	-0.0444	1	91.86	7e-06	K	NTNGLFEKDDQLSENVK	R	Deamidated (NQ)	0.00100000000000000.0		File: Feutin MPN_4.wiff, Sample: 20140807 Feutin MPN_4 (sample number 1), Elution: 41.583 min, Period: 1, Cycle(s): 7534 (Experiment 3)
4	2::WP_038534367.1	ref|WP_038534367.1| Mgp-operon protein 3 n=2 Tax_Id=2104 [Mycoplasma pneumoniae]	394	130466	23	10	21	9	752	1	0	1	990.001	1977.99	2	1978	-0.0179	0	47.33	0.23	K	TVDEVINNPDILQSFFK	F				File: Feutin MPN_4.wiff, Sample: 20140807 Feutin MPN_4 (sample number 1), Elution: 43.819 min, Period: 1, Cycle(s): 7646 (Experiment 2)
4	2::WP_038534367.1	ref|WP_038534367.1| Mgp-operon protein 3 n=2 Tax_Id=2104 [Mycoplasma pneumoniae]	394	130466	23	10	21	9	784	1	1	1	828.751	2483.23	3	2483.25	-0.0216	0	66.73	0.0028	K	ISTLESQATDGFANSLLNFGTGLK	A				File: Feutin MPN_4.wiff, Sample: 20140807 Feutin MPN_4 (sample number 1), Elution: 43.703 min, Period: 1, Cycle(s): 7641 (Experiment 2)
Found in gel mass range 45-60 kDa
Also Scores 172 against Q50341
Peak list data path	C:\Analyst Data\Projects\Mpn\20140808 Feutin MPN\Feutin MPN_5.wiff
Peak list format	Mascot generic
Search type	MIS
Mascot version	2.4.1
Database	1::contaminants 2::MSPnr100
Fasta file	1::contaminants_all_10062014.fasta 2::MSPnr100_Q215.fasta
Total sequences	68277407
Total residues	24208969539
Sequences after taxonomy filter	102795
Number of queries	889
Warning	No taxonomy indexes for contaminants, taxonomy ~Mycoplasma~ ignored. Searching all entries in contaminants
Variable modifications	--------------------------------------------------------
Identifier	Name	Delta	Neutral loss(es)
1	Deamidated (NQ)	0.984016
2	Oxidation (M)	15.9949	0	63.9983
3	Propionamide (C)	71.0371
Search Parameters	--------------------------------------------------------
Taxonomy filter	. . . . . . Mycoplasma
Enzyme	semiTrypsin
Maximum Missed Cleavages	3
Fixed modifications
Variable modifications	Deamidated (NQ),Oxidation (M),Propionamide (C)
Peptide Mass Tolerance	100
Peptide Mass Tolerance Units	ppm
Fragment Mass Tolerance	0.2
Fragment Mass Tolerance Units	Da
Mass values	Monoisotopic
Instrument type	ESI-QUAD-TOF
Format parameters	--------------------------------------------------------
Significance threshold	0.05
Max. number of hits	0
Use MudPIT protein scoring	1
Ions score cut-off	0
Include same-set proteins	0
Include sub-set proteins	0
Include unassigned	0
Require bold red	1
Use homology threshold	0
Group protein families	0
Protein hits	--------------------------------------------------------
prot_hit_num	prot_acc	prot_desc	prot_score	prot_mass	prot_matches	prot_matches_sig	prot_sequences	prot_sequences_sig	pep_query	pep_rank	pep_isbold	pep_isunique	pep_exp_mz	pep_exp_mr	pep_exp_z	pep_calc_mr	pep_delta	pep_miss	pep_score	pep_expect	pep_res_before	pep_seq	pep_res_after	pep_var_mod	pep_var_mod_pos	pep_summed_mod_pos	pep_scan_title
6	2::WP_017532792.1	ref|WP_017532792.1| Mgp-operon protein 3, partial n=2 Tax_Id=2104 [Mycoplasma pneumoniae]	172	75814	6	3	6	3	255	3	1	1	476.752	951.49	2	951.514	-0.0233	0	29.94	6.7	K	AGVDPAPVAR	G				File: Feutin MPN_5.wiff, Sample: 20140807 Feutin MPN_5 (sample number 1), Elution: 34.918 min, Period: 1, Cycle(s): 6566 (Experiment 4)
6	2::WP_017532792.1	ref|WP_017532792.1| Mgp-operon protein 3, partial n=2 Tax_Id=2104 [Mycoplasma pneumoniae]	172	75814	6	3	6	3	355	1	1	1	548.253	1094.49	2	1094.51	-0.0231	0	38.16	1.1	K	FTPAFDNQR	A				File: Feutin MPN_5.wiff, Sample: 20140807 Feutin MPN_5 (sample number 1), Elution: 38.144 min, Period: 1, Cycle(s): 6685 (Experiment 4)
6	2::WP_017532792.1	ref|WP_017532792.1| Mgp-operon protein 3, partial n=2 Tax_Id=2104 [Mycoplasma pneumoniae]	172	75814	6	3	6	3	440	1	1	1	595.819	1189.62	2	1189.66	-0.0316	0	97.28	1.7e-06	K	TSDTTLTVKPK	I				File: Feutin MPN_5.wiff, Sample: 20140807 Feutin MPN_5 (sample number 1), Elution: 34.768 min, Period: 1, Cycle(s): 6561 (Experiment 2)
6	2::WP_017532792.1	ref|WP_017532792.1| Mgp-operon protein 3, partial n=2 Tax_Id=2104 [Mycoplasma pneumoniae]	172	75814	6	3	6	3	518	1	1	1	645.828	1289.64	2	1289.67	-0.0312	0	74.83	0.00031	R	VDFAANSVLQAR	N				File: Feutin MPN_5.wiff, Sample: 20140807 Feutin MPN_5 (sample number 1), Elution: 40.832 min, Period: 1, Cycle(s): 6802 (Experiment 3)
6	2::WP_017532792.1	ref|WP_017532792.1| Mgp-operon protein 3, partial n=2 Tax_Id=2104 [Mycoplasma pneumoniae]	172	75814	6	3	6	3	745	1	1	1	875.899	1749.78	2	1749.82	-0.0346	0	90.95	8e-06	K	GGSQNNEEVQTTYPVK	S				File: Feutin MPN_5.wiff, Sample: 20140807 Feutin MPN_5 (sample number 1), Elution: 36.158 min, Period: 1, Cycle(s): 6610 (Experiment 4)
6	2::WP_017532792.1	ref|WP_017532792.1| Mgp-operon protein 3, partial n=2 Tax_Id=2104 [Mycoplasma pneumoniae]	172	75814	6	3	6	3	783	1	1	1	640.364	1918.07	3	1918.12	-0.0452	0	35.68	2.9	K	APVKPAAPTAPRPPVQPPK	K				File: Feutin MPN_5.wiff, Sample: 20140807 Feutin MPN_5 (sample number 1), Elution: 37.233 min, Period: 1, Cycle(s): 6650 (Experiment 3)
Also Scores 172 against Q50341
Found in gel mass range 34-45 kDa
Peak list data path	C:\Analyst Data\Projects\Mpn\20140808 Feutin MPN\Feutin MPN_6.wiff
Peak list format	Mascot generic
Search type	MIS
Mascot version	2.4.1
Database	1::contaminants 2::MSPnr100
Fasta file	1::contaminants_all_10062014.fasta 2::MSPnr100_Q215.fasta
Total sequences	68277407
Total residues	24208969539
Sequences after taxonomy filter	102795
Number of queries	1027
Warning	No taxonomy indexes for contaminants, taxonomy ~Mycoplasma~ ignored. Searching all entries in contaminants
Variable modifications	--------------------------------------------------------
Identifier	Name	Delta	Neutral loss(es)
1	Deamidated (NQ)	0.984016
2	Oxidation (M)	15.9949	0	63.9983
3	Propionamide (C)	71.0371
Search Parameters	--------------------------------------------------------
Taxonomy filter	. . . . . . Mycoplasma
Enzyme	semiTrypsin
Maximum Missed Cleavages	3
Fixed modifications
Variable modifications	Deamidated (NQ),Oxidation (M),Propionamide (C)
Peptide Mass Tolerance	100
Peptide Mass Tolerance Units	ppm
Fragment Mass Tolerance	0.2
Fragment Mass Tolerance Units	Da
Mass values	Monoisotopic
Instrument type	ESI-QUAD-TOF
Format parameters	--------------------------------------------------------
Significance threshold	0.05
Max. number of hits	0
Use MudPIT protein scoring	1
Ions score cut-off	0
Include same-set proteins	0
Include sub-set proteins	0
Include unassigned	0
Require bold red	1
Use homology threshold	0
Group protein families	0
Protein hits	--------------------------------------------------------
prot_hit_num	prot_acc	prot_desc	prot_score	prot_mass	prot_matches	prot_matches_sig	prot_sequences	prot_sequences_sig	pep_query	pep_rank	pep_isbold	pep_isunique	pep_exp_mz	pep_exp_mr	pep_exp_z	pep_calc_mr	pep_delta	pep_miss	pep_score	pep_expect	pep_res_before	pep_seq	pep_res_after	pep_var_mod	pep_var_mod_pos	pep_summed_mod_pos	pep_scan_title
27	2::WP_038534367.1	ref|WP_038534367.1| Mgp-operon protein 3 n=2 Tax_Id=2104 [Mycoplasma pneumoniae]	140	130466	7	3	7	3	209	1	1	1	476.75	951.486	2	951.514	-0.0275	0	46.75	0.14	K	AGVDPAPVAR	G				File: Feutin MPN_6.wiff, Sample: 20140807 Feutin MPN_6 (sample number 1), Elution: 29.952 to 30.152 min, Period: 1, Cycle(s): 5521 (Experiment 3), 5526 (Experiment 4)
27	2::WP_038534367.1	ref|WP_038534367.1| Mgp-operon protein 3 n=2 Tax_Id=2104 [Mycoplasma pneumoniae]	140	130466	7	3	7	3	227	10	1	1	487.754	973.494	2	973.483	0.0112	1	23.86	37	R	RDATSTNLP	H				File: Feutin MPN_6.wiff, Sample: 20140807 Feutin MPN_6 (sample number 1), Elution: 32.026 min, Period: 1, Cycle(s): 5601 (Experiment 3)
27	2::WP_038534367.1	ref|WP_038534367.1| Mgp-operon protein 3 n=2 Tax_Id=2104 [Mycoplasma pneumoniae]	140	130466	7	3	7	3	340	1	1	1	548.257	1094.5	2	1094.51	-0.0142	0	30.4	6.5	K	FTPAFDNQR	A				File: Feutin MPN_6.wiff, Sample: 20140807 Feutin MPN_6 (sample number 1), Elution: 36.449 min, Period: 1, Cycle(s): 5749 (Experiment 3)
27	2::WP_038534367.1	ref|WP_038534367.1| Mgp-operon protein 3 n=2 Tax_Id=2104 [Mycoplasma pneumoniae]	140	130466	7	3	7	3	446	1	1	1	595.822	1189.63	2	1189.66	-0.027	0	66.6	0.002	K	TSDTTLTVKPK	I				File: Feutin MPN_6.wiff, Sample: 20140807 Feutin MPN_6 (sample number 1), Elution: 30.077 to 30.301 min, Period: 1, Cycle(s): 5525 (Experiment 2), 5529 (Experiment 3)
27	2::WP_038534367.1	ref|WP_038534367.1| Mgp-operon protein 3 n=2 Tax_Id=2104 [Mycoplasma pneumoniae]	140	130466	7	3	7	3	566	1	1	1	645.828	1289.64	2	1289.67	-0.0312	0	82.42	5.5e-05	R	VDFAANSVLQAR	N				File: Feutin MPN_6.wiff, Sample: 20140807 Feutin MPN_6 (sample number 1), Elution: 41.65 min, Period: 1, Cycle(s): 5945 (Experiment 3)
27	2::WP_038534367.1	ref|WP_038534367.1| Mgp-operon protein 3 n=2 Tax_Id=2104 [Mycoplasma pneumoniae]	140	130466	7	3	7	3	690	1	1	1	706.877	1411.74	2	1411.78	-0.0435	0	53.51	0.04	K	IAGIPLNIDFPSR	I				File: Feutin MPN_6.wiff, Sample: 20140807 Feutin MPN_6 (sample number 1), Elution: 42.882 min, Period: 1, Cycle(s): 6004 (Experiment 3)
27	2::WP_038534367.1	ref|WP_038534367.1| Mgp-operon protein 3 n=2 Tax_Id=2104 [Mycoplasma pneumoniae]	140	130466	7	3	7	3	954	1	1	1	640.366	1918.08	3	1918.12	-0.038	0	44.43	0.37	K	APVKPAAPTAPRPPVQPPK	K				File: Feutin MPN_6.wiff, Sample: 20140807 Feutin MPN_6 (sample number 1), Elution: 35.505 to 35.73 min, Period: 1, Cycle(s): 5726 (Experiment 3), 5719, 5724 (Experiment 4)
Found in gel mass range 20-34 kDa
Peak list data path	C:\Analyst Data\Projects\Mpn\20140808 Feutin MPN\Feutin MPN_7.wiff
Peak list format	Mascot generic
Search type	MIS
Mascot version	2.4.1
Database	1::contaminants 2::MSPnr100
Fasta file	1::contaminants_all_10062014.fasta 2::MSPnr100_Q215.fasta
Total sequences	68277407
Total residues	24208969539
Sequences after taxonomy filter	102795
Number of queries	913
Warning	No taxonomy indexes for contaminants, taxonomy ~Mycoplasma~ ignored. Searching all entries in contaminants
Variable modifications	--------------------------------------------------------
Identifier	Name	Delta	Neutral loss(es)
1	Deamidated (NQ)	0.984016
2	Oxidation (M)	15.9949	0	63.9983
3	Propionamide (C)	71.0371
Search Parameters	--------------------------------------------------------
Taxonomy filter	. . . . . . Mycoplasma
Enzyme	semiTrypsin
Maximum Missed Cleavages	3
Fixed modifications
Variable modifications	Deamidated (NQ),Oxidation (M),Propionamide (C)
Peptide Mass Tolerance	100
Peptide Mass Tolerance Units	ppm
Fragment Mass Tolerance	0.2
Fragment Mass Tolerance Units	Da
Mass values	Monoisotopic
Instrument type	ESI-QUAD-TOF
Format parameters	--------------------------------------------------------
Significance threshold	0.05
Max. number of hits	0
Use MudPIT protein scoring	1
Ions score cut-off	0
Include same-set proteins	0
Include sub-set proteins	0
Include unassigned	0
Require bold red	1
Use homology threshold	0
Group protein families	0
Protein hits	--------------------------------------------------------
prot_hit_num	prot_acc	prot_desc	prot_score	prot_mass	prot_matches	prot_matches_sig	prot_sequences	prot_sequences_sig	pep_query	pep_rank	pep_isbold	pep_isunique	pep_exp_mz	pep_exp_mr	pep_exp_z	pep_calc_mr	pep_delta	pep_miss	pep_score	pep_expect	pep_res_before	pep_seq	pep_res_after	pep_var_mod	pep_var_mod_pos	pep_summed_mod_pos	pep_scan_title
4	2::WP_038534367.1	ref|WP_038534367.1| Mgp-operon protein 3 n=2 Tax_Id=2104 [Mycoplasma pneumoniae]	341	130466	17	8	15	7	199	1	1	0	454.724	907.433	2	907.455	-0.0226	0	42.86	0.38	R	ATWVFER	K				File: Feutin MPN_7.wiff, Sample: 20140807 Feutin MPN_7 (sample number 1), Elution: 40.983 min, Period: 1, Cycle(s): 6487 (Experiment 2)
4	2::WP_038534367.1	ref|WP_038534367.1| Mgp-operon protein 3 n=2 Tax_Id=2104 [Mycoplasma pneumoniae]	341	130466	17	8	15	7	203	2	1	1	456.271	910.528	2	910.56	-0.032	0	24.11	13	A	VTVVAGPLR	A				File: Feutin MPN_7.wiff, Sample: 20140807 Feutin MPN_7 (sample number 1), Elution: 36.73 min, Period: 1, Cycle(s): 6315 (Experiment 4)
4	2::WP_038534367.1	ref|WP_038534367.1| Mgp-operon protein 3 n=2 Tax_Id=2104 [Mycoplasma pneumoniae]	341	130466	17	8	15	7	273	1	1	0	489.768	977.521	2	977.555	-0.0337	1	37.76	1.4	K	AVTGFKLDK	G				File: Feutin MPN_7.wiff, Sample: 20140807 Feutin MPN_7 (sample number 1), Elution: 35.447 min, Period: 1, Cycle(s): 6255 (Experiment 2)
4	2::WP_038534367.1	ref|WP_038534367.1| Mgp-operon protein 3 n=2 Tax_Id=2104 [Mycoplasma pneumoniae]	341	130466	17	8	15	7	274	1	1	0	489.774	977.534	2	977.555	-0.0211	1	59.62	0.0085	K	AVTGFKLDK	G				File: Feutin MPN_7.wiff, Sample: 20140807 Feutin MPN_7 (sample number 1), Elution: 35.619 to 35.853 min, Period: 1, Cycle(s): 6267 (Experiment 2), 6275 (Experiment 3)
4	2::WP_038534367.1	ref|WP_038534367.1| Mgp-operon protein 3 n=2 Tax_Id=2104 [Mycoplasma pneumoniae]	341	130466	17	8	15	7	398	1	1	1	548.253	1094.49	2	1094.51	-0.0231	0	33.62	3	K	FTPAFDNQR	A				File: Feutin MPN_7.wiff, Sample: 20140807 Feutin MPN_7 (sample number 1), Elution: 35.171 min, Period: 1, Cycle(s): 6242 (Experiment 3)
4	2::WP_038534367.1	ref|WP_038534367.1| Mgp-operon protein 3 n=2 Tax_Id=2104 [Mycoplasma pneumoniae]	341	130466	17	8	15	7	494	1	1	1	595.826	1189.64	2	1189.66	-0.0178	0	82.32	5.4e-05	K	TSDTTLTVKPK	I				File: Feutin MPN_7.wiff, Sample: 20140807 Feutin MPN_7 (sample number 1), Elution: 29.007 min, Period: 1, Cycle(s): 5737 (Experiment 2)
4	2::WP_038534367.1	ref|WP_038534367.1| Mgp-operon protein 3 n=2 Tax_Id=2104 [Mycoplasma pneumoniae]	341	130466	17	8	15	7	618	1	1	1	645.831	1289.65	2	1289.67	-0.0263	0	67.13	0.0019	R	VDFAANSVLQAR	N				File: Feutin MPN_7.wiff, Sample: 20140807 Feutin MPN_7 (sample number 1), Elution: 40.659 min, Period: 1, Cycle(s): 6471 (Experiment 4)
4	2::WP_038534367.1	ref|WP_038534367.1| Mgp-operon protein 3 n=2 Tax_Id=2104 [Mycoplasma pneumoniae]	341	130466	17	8	15	7	839	1	1	1	838.869	1675.72	2	1675.77	-0.0492	0	38.14	1.3	K	TTAENDAPLVGMVGSGAA	G	Oxidation (M)	0.000000000002000000.0		File: Feutin MPN_7.wiff, Sample: 20140807 Feutin MPN_7 (sample number 1), Elution: 38.168 min, Period: 1, Cycle(s): 6369 (Experiment 3)
4	2::WP_038534367.1	ref|WP_038534367.1| Mgp-operon protein 3 n=2 Tax_Id=2104 [Mycoplasma pneumoniae]	341	130466	17	8	15	7	853	1	1	1	889.416	1776.82	2	1776.86	-0.04	0	52.41	0.062	K	LNESWPVYEPLDSTK	E				File: Feutin MPN_7.wiff, Sample: 20140807 Feutin MPN_7 (sample number 1), Elution: 41.488 min, Period: 1, Cycle(s): 6513 (Experiment 3)
4	2::WP_038534367.1	ref|WP_038534367.1| Mgp-operon protein 3 n=2 Tax_Id=2104 [Mycoplasma pneumoniae]	341	130466	17	8	15	7	859	1	1	1	910.897	1819.78	2	1819.83	-0.0464	0	23.45	39	K	TTAENDAPLVGMVGSGAAGS	A	Oxidation (M)	0.00000000000200000000.0		File: Feutin MPN_7.wiff, Sample: 20140807 Feutin MPN_7 (sample number 1), Elution: 37.342 min, Period: 1, Cycle(s): 6336 (Experiment 4)
4	2::WP_038534367.1	ref|WP_038534367.1| Mgp-operon protein 3 n=2 Tax_Id=2104 [Mycoplasma pneumoniae]	341	130466	17	8	15	7	860	1	1	1	456.229	1820.89	4	1820.93	-0.0461	1	41.35	0.85	R	AAHLHPSYELVDWKR	V				File: Feutin MPN_7.wiff, Sample: 20140807 Feutin MPN_7 (sample number 1), Elution: 40.673 min, Period: 1, Cycle(s): 6472 (Experiment 3)
4	2::WP_038534367.1	ref|WP_038534367.1| Mgp-operon protein 3 n=2 Tax_Id=2104 [Mycoplasma pneumoniae]	341	130466	17	8	15	7	870	1	1	1	640.364	1918.07	3	1918.12	-0.0452	0	27.42	19	K	APVKPAAPTAPRPPVQPPK	K				File: Feutin MPN_7.wiff, Sample: 20140807 Feutin MPN_7 (sample number 1), Elution: 34.448 min, Period: 1, Cycle(s): 6210 (Experiment 2)
4	2::WP_038534367.1	ref|WP_038534367.1| Mgp-operon protein 3 n=2 Tax_Id=2104 [Mycoplasma pneumoniae]	341	130466	17	8	15	7	903	1	1	0	799.413	2395.22	3	2395.27	-0.0577	0	57.39	0.024	K	TLQDLLVEQPVTPYTPNAGLAR	V				File: Feutin MPN_7.wiff, Sample: 20140807 Feutin MPN_7 (sample number 1), Elution: 41.834 min, Period: 1, Cycle(s): 6530 (Experiment 4)
4	2::WP_038534367.1	ref|WP_038534367.1| Mgp-operon protein 3 n=2 Tax_Id=2104 [Mycoplasma pneumoniae]	341	130466	17	8	15	7	907	1	1	1	830.707	2489.1	3	2489.13	-0.0335	0	54.52	0.042	R	VNGVAQDTVHFGSGQESSWNSQR	S				File: Feutin MPN_7.wiff, Sample: 20140807 Feutin MPN_7 (sample number 1), Elution: 39.368 min, Period: 1, Cycle(s): 6415 (Experiment 2)
4	2::WP_038534367.1	ref|WP_038534367.1| Mgp-operon protein 3 n=2 Tax_Id=2104 [Mycoplasma pneumoniae]	341	130466	17	8	15	7	908	1	1	1	831.026	2490.06	3	2490.12	-0.0596	0	80.24	9.7e-05	R	VNGVAQDTVHFGSGQESSWNSQR	S	Deamidated (NQ)	0.01000000000000000000000.0		File: Feutin MPN_7.wiff, Sample: 20140807 Feutin MPN_7 (sample number 1), Elution: 39.617 min, Period: 1, Cycle(s): 6429 (Experiment 3)
4	2::WP_038534367.1	ref|WP_038534367.1| Mgp-operon protein 3 n=2 Tax_Id=2104 [Mycoplasma pneumoniae]	341	130466	17	8	15	7	912	1	1	1	974.406	2920.2	3	2920.26	-0.0621	0	74.8	0.0003	K	FQDTTSSDQSNTNQNALSFDTQESQK	A				File: Feutin MPN_7.wiff, Sample: 20140807 Feutin MPN_7 (sample number 1), Elution: 37.223 min, Period: 1, Cycle(s): 6332 (Experiment 4)
4	2::WP_038534367.1	ref|WP_038534367.1| Mgp-operon protein 3 n=2 Tax_Id=2104 [Mycoplasma pneumoniae]	341	130466	17	8	15	7	913	1	1	1	1050.12	3147.34	3	3147.42	-0.0794	1	68.22	0.0017	R	VKFQDTTSSDQSNTNQNALSFDTQESQK	A				File: Feutin MPN_7.wiff, Sample: 20140807 Feutin MPN_7 (sample number 1), Elution: 38.129 min, Period: 1, Cycle(s): 6367 (Experiment 4)
Found in gel mass range 14-20 kDa
Also Scores 83 against Q50341
Peak list data path	C:\Analyst Data\Projects\Mpn\20140808 Feutin MPN\Feutin MPN_8.wiff
Peak list format	Mascot generic
Search type	MIS
Mascot version	2.4.1
Database	1::contaminants 2::MSPnr100
Fasta file	1::contaminants_all_10062014.fasta 2::MSPnr100_Q215.fasta
Total sequences	68277407
Total residues	24208969539
Sequences after taxonomy filter	102795
Number of queries	756
Warning	No taxonomy indexes for contaminants, taxonomy ~Mycoplasma~ ignored. Searching all entries in contaminants
Variable modifications	--------------------------------------------------------
Identifier	Name	Delta	Neutral loss(es)
1	Deamidated (NQ)	0.984016
2	Oxidation (M)	15.9949	0	63.9983
3	Propionamide (C)	71.0371
Search Parameters	--------------------------------------------------------
Taxonomy filter	. . . . . . Mycoplasma
Enzyme	semiTrypsin
Maximum Missed Cleavages	3
Fixed modifications
Variable modifications	Deamidated (NQ),Oxidation (M),Propionamide (C)
Peptide Mass Tolerance	100
Peptide Mass Tolerance Units	ppm
Fragment Mass Tolerance	0.2
Fragment Mass Tolerance Units	Da
Mass values	Monoisotopic
Instrument type	ESI-QUAD-TOF
Format parameters	--------------------------------------------------------
Significance threshold	0.05
Max. number of hits	0
Use MudPIT protein scoring	1
Ions score cut-off	0
Include same-set proteins	0
Include sub-set proteins	0
Include unassigned	0
Require bold red	1
Use homology threshold	0
Group protein families	0
Protein hits	--------------------------------------------------------
prot_hit_num	prot_acc	prot_desc	prot_score	prot_mass	prot_matches	prot_matches_sig	prot_sequences	prot_sequences_sig	pep_query	pep_rank	pep_isbold	pep_isunique	pep_exp_mz	pep_exp_mr	pep_exp_z	pep_calc_mr	pep_delta	pep_miss	pep_score	pep_expect	pep_res_before	pep_seq	pep_res_after	pep_var_mod	pep_var_mod_pos	pep_summed_mod_pos	pep_scan_title
49	2::WP_036453165.1	ref|WP_036453165.1| Mgp-operon protein 3, partial n=2 Tax_Id=2104 [Mycoplasma pneumoniae]	83	50097	2	1	2	1	317	1	1	1	595.817	1189.62	2	1189.66	-0.0363	0	72.73	0.0005	K	TSDTTLTVKPK	I				File: Feutin MPN_8.wiff, Sample: 20140807 Feutin MPN_8 (sample number 1), Elution: 27.927 min, Period: 1, Cycle(s): 5556 (Experiment 2)
49	2::WP_036453165.1	ref|WP_036453165.1| Mgp-operon protein 3, partial n=2 Tax_Id=2104 [Mycoplasma pneumoniae]	83	50097	2	1	2	1	714	1	1	1	640.366	1918.08	3	1918.12	-0.038	0	44.24	0.39	K	APVKPAAPTAPRPPVQPPK	K				File: Feutin MPN_8.wiff, Sample: 20140807 Feutin MPN_8 (sample number 1), Elution: 33.611 to 33.825 min, Period: 1, Cycle(s): 6003 (Experiment 2), 6008 (Experiment 3)
Also Scores 83 against Q50341

## Sheet: A549
Found in gel mass range 75-100 kDa
Also Scores 101 against Q50341
Peak list data path	C:\Analyst Data\Projects\Mpn\20150119 A549 Column A Acid Elution\A549_23.wiff
Peak list format	Mascot generic
Search type	MIS
Mascot version	2.4.1
Database	1::contaminants 2::MSPnr100
Fasta file	1::contaminants_all_10062014.fasta 2::MSPnr100_Q215.fasta
Total sequences	68277407
Total residues	24208969539
Sequences after taxonomy filter	45994645
Number of queries	303
Warning	No taxonomy indexes for contaminants, taxonomy ~Bacteria (Eubacteria)~ ignored. Searching all entries in contaminants
Variable modifications	--------------------------------------------------------
Identifier	Name	Delta	Neutral loss(es)
1	Deamidated (NQ)	0.984016
2	NHS-LC-Biotin (K)	339.162
3	NHS-LC-Biotin (N-term)	339.162
4	Oxidation (M)	15.9949	0	63.9983
5	Propionamide (C)	71.0371
Search Parameters	--------------------------------------------------------
Taxonomy filter	. . Bacteria (Eubacteria)
Enzyme	semiTrypsin
Maximum Missed Cleavages	3
Fixed modifications
Variable modifications	Deamidated (NQ),NHS-LC-Biotin (K),NHS-LC-Biotin (N-term),Oxidation (M),Propionamide (C)
Peptide Mass Tolerance	100
Peptide Mass Tolerance Units	ppm
Fragment Mass Tolerance	0.2
Fragment Mass Tolerance Units	Da
Mass values	Monoisotopic
Instrument type	ESI-QUAD-TOF
Format parameters	--------------------------------------------------------
Significance threshold	0.05
Max. number of hits	0
Use MudPIT protein scoring	0
Ions score cut-off	0
Include same-set proteins	0
Include sub-set proteins	0
Include unassigned	0
Require bold red	1
Use homology threshold	0
Group protein families	0
Protein hits	--------------------------------------------------------
prot_hit_num	prot_acc	prot_desc	prot_score	prot_mass	prot_matches	prot_matches_sig	prot_sequences	prot_sequences_sig	pep_query	pep_rank	pep_isbold	pep_isunique	pep_exp_mz	pep_exp_mr	pep_exp_z	pep_calc_mr	pep_delta	pep_miss	pep_score	pep_expect	pep_res_before	pep_seq	pep_res_after	pep_var_mod	pep_var_mod_pos	pep_summed_mod_pos	pep_scan_title
7	2::WP_017532792.1	ref|WP_017532792.1| Mgp-operon protein 3, partial n=2 Tax_Id=2104 [Mycoplasma pneumoniae]	102	75814	1	1	1	1	278	1	1	1	875.911	1749.81	2	1749.82	-0.0103	0	103.87	0.00038	K	GGSQNNEEVQTTYPVK	S				File: A549_23.wiff, Sample: 20150119 A549_23 (sample number 1), Elution: 41.193 min, Period: 1, Cycle(s): 9006 (Experiment 2)
Also Scores 101 against Q50341
